# Supplementary material for: Microbiota Community Structure and Interaction Networks within Dermacentor silvarum, Ixodes persulcatus, and Haemaphysalis concinna
Source: Animals (Basel). 2022 Nov 22;12(23):3237. doi: 10.3390/ani12233237 (PMC9735619; doi:10.3390/ani12233237)
Supplement: Supplementary file 1 [file animals-12-03237-s001.zip › Table S1.xlsx]

## Sheet: Sheet1
# Constructed from biom file
#OTU ID	I1	I2	I3	I4	I5	I6	I7	I8	I9	D1	D2	D3	D4	D5	D6	D7	D8	D9	D10	D11	D12	D13	D14	D15	D16	D17	D18	I19	I20	I21	I22	I23	I24	I25	I26	I27	D28	D29	D30	D31	D32	D33	D34	D35	D36	H1	H2	H3	H4
OTU1	17	35	11	10	54	48	44	43	35	48826	53006	55895	39772	21720	18231	8589	15072	11881	11229	10129	2994	8110	14276	8986	13534	7825	8781	752	129	94	1012	1716	189	151	330	36	21	121	16	108	2941	27505	105	73	83	28	0	0	50
OTU10	1462	1620	1561	1388	1643	1279	1327	1496	1520	109	153	116	166	205	201	412	357	260	399	195	351	223	353	246	214	279	368	281	250	480	546	191	546	345	264	401	200	292	233	179	322	166	309	184	560	427	355	312	466
OTU100	187	137	251	112	211	184	145	171	169	31	43	57	58	176	270	247	283	270	165	227	114	159	70	310	379	197	255	295	162	211	427	336	63	238	306	443	260	200	400	422	511	112	382	178	151	168	350	343	301
OTU10006	0	4	1	0	0	1	1	0	0	0	0	0	0	0	0	0	0	0	0	35	0	0	0	0	0	0	41	0	0	0	0	1	67	0	0	0	0	0	0	65	1	0	0	0	21	0	0	0	0
OTU10019	7	6	5	15	4	5	11	20	0	0	1	2	14	0	1	0	0	3	0	2	0	38	4	35	1	32	1	1	3	45	0	0	0	0	0	0	1	29	0	1	0	0	43	1	49	0	0	0	0
OTU1003	19	0	12	15	1	13	0	15	8	0	0	0	0	1	16	1	15	1	19	0	0	1	25	1	14	1	1	1	2	11	0	10	1	3	0	1	1	1	0	0	0	1	0	0	1	0	44	0	0
OTU1006	12	21	14	15	0	12	30	3	21	0	0	0	0	0	0	47	0	0	0	0	0	1	0	0	0	0	0	0	0	0	0	0	0	0	0	1	0	0	0	41	0	0	0	0	0	0	0	0	0
OTU1007	2	0	13	11	0	8	11	1	17	8	0	0	1	1	0	0	0	0	0	0	0	1	1	0	0	0	22	21	16	0	0	0	0	0	0	1	7	0	40	17	0	0	0	0	17	0	0	36	0
OTU1008	0	0	11	17	1	3	6	0	0	24	0	3	0	0	15	0	0	0	0	0	1	37	0	0	1	0	0	1	0	0	0	1	0	0	0	0	1	0	0	17	35	0	0	0	49	0	0	0	0
OTU1009	0	0	0	2	0	0	10	4	0	0	0	0	0	0	0	0	0	0	0	0	17	28	0	0	0	16	0	0	0	0	0	0	0	0	0	0	0	1	0	0	0	0	0	0	0	0	4	0	0
OTU101	15	8	8	23	15	16	43	33	27	11	24	10	44	79	33	8	5	22	68	76	0	26	7	27	19	130	78	23	5	0	0	72	62	26	117	21	57	8	65	1	59	33	48	26	32	33	24	138	48
OTU1011	17	9	0	1	0	0	0	6	28	1	2	1	0	1	0	1	0	0	0	1	0	34	0	0	54	0	0	0	74	0	21	0	0	0	20	0	1	0	0	0	53	0	0	22	10	22	123	0	0
OTU1012	2	0	0	0	0	0	1	0	0	0	0	0	0	0	0	43	0	30	1	0	0	0	1	6	0	1	19	34	2	0	48	0	0	0	0	0	0	1	0	24	0	0	0	0	0	22	0	118	0
OTU1013	14	0	19	0	0	8	21	13	9	0	0	0	0	0	0	0	0	3	2	1	1	0	0	0	0	0	3	0	5	1	0	0	0	3	2	1	0	0	0	0	1	1	0	0	20	0	0	0	0
OTU10143	0	0	1	0	0	0	0	0	0	0	0	0	0	1	0	0	0	0	16	2	0	0	0	1	0	0	0	1	7	18	0	0	0	0	1	0	22	0	0	0	24	0	34	0	0	1	0	0	0
OTU1018	5	8	0	25	0	8	0	7	0	11	0	0	0	0	47	1	0	0	0	0	0	55	31	28	26	0	0	0	0	66	50	65	0	0	0	0	0	1	0	0	0	0	0	0	1	0	0	61	0
OTU1019	1	0	0	0	0	3	8	3	1	22	0	0	0	1	0	1	0	0	0	51	127	2	25	0	9	0	118	0	4	29	37	65	0	190	19	0	16	0	39	33	41	0	68	29	55	40	0	83	0
OTU102	11	19	19	0	24	47	17	20	19	16	30	18	32	34	46	100	4	1	86	78	104	88	55	77	147	0	0	2	38	59	110	1	69	59	0	161	0	35	68	0	215	1	74	37	81	0	92	35	24
OTU1020	0	0	8	7	4	0	0	0	8	5	0	14	7	0	0	0	2	0	0	0	0	0	0	0	0	0	16	19	0	0	0	0	0	0	0	0	0	21	0	63	0	0	25	0	0	45	0	0	41
OTU1021	19	1	23	0	9	32	5	0	1	16	0	1	0	13	0	0	27	62	0	9	0	0	0	56	1	0	0	1	1	0	43	64	0	0	42	67	0	11	2	0	54	22	24	27	18	0	0	0	75
OTU1022	5	1	0	0	6	0	0	0	0	0	0	0	20	0	23	64	60	0	0	1	1	12	0	44	0	3	0	0	5	0	38	0	1	0	0	0	0	1	0	0	0	1	28	38	0	0	23	23	57
OTU1023	5	0	0	15	25	0	0	0	0	0	18	1	0	2	48	0	0	42	0	1	35	2	29	0	0	0	0	46	16	32	0	85	0	2	74	2	0	69	15	0	88	0	94	1	86	44	24	76	0
OTU10239	1	8	15	0	4	4	0	0	0	0	0	17	4	0	11	1	0	57	0	2	2	25	0	1	4	1	0	6	19	29	0	0	0	0	0	1	0	1	0	46	52	0	0	47	0	0	48	1	1
OTU1026	21	39	29	5	35	3	21	22	36	6	0	0	22	2	52	45	31	18	0	53	0	0	47	49	34	0	79	0	20	55	30	24	5	1	0	1	40	29	15	13	20	22	28	47	24	60	74	79	11
OTU1029	8	31	58	11	14	13	10	0	14	0	0	0	0	0	0	0	0	0	0	0	0	0	0	0	0	0	0	8	0	1	0	0	0	0	0	0	0	0	0	0	0	0	0	0	0	0	0	0	0
OTU103	7	41	34	50	23	32	25	19	23	35	23	5	5	20	32	125	66	33	105	119	4	30	63	36	30	68	63	35	16	59	11	73	75	153	103	61	49	23	116	134	47	23	101	8	131	18	0	76	13
OTU1032	13	2	23	4	0	19	9	14	9	0	2	10	0	0	0	0	1	0	0	22	14	0	1	0	0	0	0	0	64	0	0	0	0	81	0	0	1	17	0	1	39	0	24	0	3	0	0	89	1
OTU1033	0	0	0	0	0	0	0	0	0	0	0	1	0	0	16	0	0	0	59	0	0	0	0	0	0	0	0	52	0	15	0	21	0	0	0	0	1	0	0	0	0	0	0	0	0	18	0	0	37
OTU10331	0	0	32	0	14	0	12	1	0	0	0	0	0	0	0	26	0	0	0	0	1	0	0	0	1	0	0	0	0	1	1	0	0	1	0	0	0	0	0	0	0	1	1	0	0	65	0	0	18
OTU10336	0	0	0	0	0	0	0	0	0	0	0	0	0	29	0	37	0	0	0	1	0	0	16	1	4	4	2	1	1	3	4	4	4	2	4	4	1	0	0	39	2	0	0	1	0	0	0	0	0
OTU1035	50	36	38	15	26	14	2	22	37	0	0	0	0	0	0	0	0	0	0	0	0	0	0	0	0	0	0	0	0	0	0	0	0	0	0	0	0	0	0	0	0	0	0	0	0	0	0	0	0
OTU1036	0	0	0	0	18	0	2	0	0	0	0	0	0	0	0	0	0	0	0	0	0	0	0	0	0	0	28	0	0	0	0	0	0	0	0	0	0	0	0	0	0	0	0	0	0	0	0	0	1
OTU10375	18	14	5	12	16	25	18	0	5	2	3	13	2	58	0	2	32	20	0	4	27	54	5	7	1	8	0	53	30	17	1	1	1	2	0	0	3	3	24	25	1	0	4	34	16	7	66	2	12
OTU1038	0	0	0	0	0	0	0	0	0	0	0	0	0	0	0	0	20	0	0	36	0	0	0	25	0	0	32	0	0	0	0	0	0	0	0	0	0	0	0	0	0	0	0	0	0	0	0	0	0
OTU10384	1	1	1	0	0	4	0	0	0	0	1	0	0	0	1	87	0	0	81	1	0	2	0	1	4	0	1	47	0	0	0	1	0	9	0	52	0	1	0	1	0	0	9	0	5	31	0	0	0
OTU1039	0	0	0	0	0	0	0	0	0	0	1	0	0	4	1	0	1	34	0	1	21	0	23	0	0	0	0	0	81	0	0	0	0	0	0	0	0	0	37	33	0	0	53	0	27	21	0	0	0
OTU104	232	286	254	300	337	205	289	378	298	2	0	5	3	5	2	24	4	1	18	0	2	4	0	0	40	1	0	0	1	1	2	1	2	1	1	0	2	0	1	1	1	1	3	1	2	0	0	0	15
OTU1040	1	0	0	0	0	10	15	3	0	1	0	0	0	6	0	0	18	11	1	0	14	14	34	17	1	1	17	0	1	21	0	0	49	0	61	0	2	1	43	0	29	0	0	9	0	0	0	0	0
OTU10401	9	1	0	4	0	4	4	0	0	0	2	0	0	1	0	1	1	0	17	34	1	0	0	0	0	1	0	0	21	50	0	0	0	54	0	1	29	0	0	0	0	0	0	0	22	0	0	1	0
OTU1043	0	0	5	7	0	0	0	2	0	0	0	0	0	1	0	1	0	0	0	0	0	0	0	38	0	0	0	23	0	0	0	0	0	27	17	0	0	0	1	0	0	57	0	0	30	12	0	0	0
OTU1044	0	6	0	0	11	5	0	0	1	0	0	0	0	64	110	1	1	80	0	59	0	0	22	1	0	2	0	0	26	38	1	6	2	0	0	0	0	1	34	1	38	5	93	79	26	35	0	42	0
OTU1045	21	0	21	54	31	10	5	12	29	0	22	1	0	7	0	0	1	1	31	2	1	0	1	1	0	1	0	0	12	0	0	0	0	1	32	0	0	1	1	0	45	1	0	0	0	35	0	0	0
OTU1046	0	8	4	33	9	3	0	4	10	0	7	3	46	3	0	41	21	0	8	36	66	12	76	84	34	1	3	62	13	73	21	87	10	30	0	0	46	56	47	70	3	87	18	0	9	0	4	0	92
OTU10466	0	0	11	0	0	0	0	0	0	0	0	0	0	3	3	1	27	0	0	0	0	15	1	33	0	27	3	0	1	2	0	11	2	0	1	32	0	33	43	0	0	0	0	0	12	0	4	0	0
OTU1048	45	16	1	32	7	12	12	0	36	1	0	0	0	0	1	32	29	27	0	0	0	0	0	0	0	0	0	0	0	34	0	0	67	0	0	1	0	1	0	0	1	0	70	0	0	0	0	0	0
OTU10484	0	0	0	0	0	0	0	0	0	0	0	1	0	0	1	1	0	29	0	14	1	26	0	0	0	0	0	0	1	0	0	0	0	0	0	29	29	32	0	1	0	0	68	0	0	0	0	1	1
OTU1049	0	0	0	0	0	0	0	1	0	0	0	0	0	1	0	0	0	0	0	0	0	2	0	0	0	0	0	0	27	25	0	0	0	0	0	0	35	0	0	0	1	18	0	1	12	0	0	0	0
OTU105	74	37	54	65	76	105	62	60	78	1	0	1	2	2	24	31	22	8	17	21	10	6	9	3	1	20	3	30	19	35	0	48	36	49	0	0	0	24	0	2	0	21	2	54	2	42	64	32	0
OTU1051	22	11	16	18	47	44	14	8	18	0	0	0	0	0	0	0	0	0	0	0	0	0	0	13	0	1	0	0	0	0	0	0	0	0	0	0	0	0	0	0	0	0	0	0	0	0	0	0	0
OTU1052	0	18	11	0	37	0	0	0	0	0	0	0	0	0	0	0	0	0	22	19	0	0	0	15	0	0	0	0	0	0	0	0	0	0	0	0	0	0	0	0	0	0	0	0	0	13	0	0	0
OTU1054	0	0	12	0	6	6	1	0	0	0	38	0	0	23	8	2	2	7	69	1	3	2	2	48	4	3	1	1	0	2	0	18	8	2	0	3	3	0	0	1	0	1	0	29	10	22	37	0	100
OTU10546	0	0	2	0	0	0	0	0	0	0	4	0	10	4	0	2	0	0	0	50	0	0	6	14	24	0	0	0	10	0	55	0	0	0	19	0	0	0	1	27	0	0	0	0	24	1	36	40	0
OTU1056	0	1	12	0	4	4	21	8	0	0	0	6	24	39	44	22	7	3	82	1	0	1	6	24	5	11	0	0	7	49	67	1	32	0	2	2	49	57	4	62	33	2	1	1	19	88	0	0	1
OTU1058	0	0	0	0	0	0	0	0	0	5	0	0	0	17	0	0	0	0	0	30	0	0	0	0	13	0	0	34	0	0	0	0	0	0	0	26	17	0	0	0	0	0	0	0	0	0	0	0	0
OTU10585	0	0	33	0	0	0	0	0	0	0	13	0	0	0	0	0	0	0	0	0	0	0	33	0	0	0	0	1	0	0	0	0	0	0	34	1	0	0	17	0	0	0	0	0	25	0	47	0	0
OTU106	16	45	47	60	52	75	78	108	32	37	10	50	7	238	49	182	31	105	70	42	59	157	115	110	106	52	60	155	100	395	162	67	42	0	43	1	117	67	52	81	63	149	155	22	352	0	118	102	121
OTU1062	0	13	0	11	0	13	0	6	9	1	0	0	0	17	0	0	0	0	0	0	0	0	0	0	0	0	0	0	1	0	0	0	0	0	11	1	0	0	0	0	40	0	0	0	0	0	0	0	0
OTU10626	1	3	0	3	0	30	8	2	0	2	6	0	0	4	3	0	2	4	0	1	1	5	24	1	28	2	65	53	33	0	2	23	72	1	29	2	23	1	69	102	27	4	27	0	3	53	24	0	0
OTU1063	14	0	0	6	0	0	0	1	20	0	2	0	1	1	1	2	1	1	24	2	1	2	0	1	2	1	2	2	0	11	0	102	56	51	2	2	1	1	82	1	0	45	20	0	3	0	0	34	0
OTU1064	3	0	0	3	3	0	4	4	0	0	0	0	3	0	0	0	0	0	0	0	0	54	0	0	0	15	0	0	0	0	67	0	16	1	0	51	35	27	0	0	0	9	0	0	10	27	0	0	2
OTU10698	8	13	2	1	2	3	2	3	1	0	0	0	0	2	0	0	1	46	3	0	0	0	1	0	1	0	1	0	1	0	82	54	0	1	0	48	0	0	1	0	3	2	2	0	1	0	23	0	0
OTU107	34	31	47	29	44	55	37	50	43	5	8	11	16	1	5	4	75	83	56	4	34	44	73	74	2	45	62	218	33	59	102	34	53	21	51	34	18	70	37	31	14	26	2	2	58	51	0	2	43
OTU1071	37	14	79	32	20	28	10	12	25	0	0	0	0	0	0	0	0	0	0	0	0	0	2	0	0	0	0	0	0	0	0	0	0	0	0	0	1	0	0	0	0	0	0	0	0	0	0	0	0
OTU1072	22	0	12	0	11	7	2	43	12	0	0	0	0	0	0	0	0	0	2	0	0	0	33	0	0	0	0	0	2	0	0	0	0	0	0	0	0	0	0	0	10	0	0	0	0	0	0	0	0
OTU1074	0	2	2	7	0	0	3	7	0	1	5	0	0	37	9	9	2	1	0	2	0	0	1	54	2	0	0	0	33	0	29	74	3	2	0	0	0	0	0	23	1	0	55	0	63	0	0	0	0
OTU10742	1	0	0	0	1	0	0	1	10	0	0	0	0	1	25	0	0	2	1	3	0	14	20	1	0	0	0	2	0	1	0	0	2	3	1	0	0	0	16	0	0	0	0	0	0	0	0	0	0
OTU1076	19	0	0	9	0	26	16	23	38	0	0	0	0	0	0	0	0	0	0	0	0	0	0	0	0	0	0	0	0	0	0	0	0	0	0	0	0	0	0	0	0	0	0	0	0	0	0	0	0
OTU10768	18	9	0	2	23	1	0	18	6	2	0	0	0	0	0	0	0	22	0	24	5	0	0	9	0	8	0	0	1	10	17	13	0	0	0	1	21	0	0	0	0	0	0	26	11	1	14	0	0
OTU1077	10	0	0	0	7	2	0	1	1	0	0	0	0	1	0	1	0	14	0	0	0	49	19	17	0	0	0	0	0	10	27	0	47	0	25	51	19	0	0	0	18	11	0	16	0	0	0	43	18
OTU10795	0	22	0	0	14	0	0	0	0	16	0	0	1	1	0	94	0	0	0	0	32	2	0	32	0	0	0	1	0	0	0	0	0	0	1	0	0	0	0	1	25	0	0	0	0	1	43	0	0
OTU108	0	0	0	0	0	0	0	0	0	0	0	0	0	0	0	1	0	0	0	0	0	0	0	0	0	0	0	1	0	0	0	1	0	0	0	0	0	0	0	0	0	0	0	0	0	0	0	0	0
OTU1080	0	0	1	1	0	9	1	0	0	0	0	0	0	0	0	42	0	25	1	10	0	0	36	24	1	0	55	36	0	49	45	0	0	0	0	50	0	65	19	0	0	7	17	0	1	0	0	0	0
OTU10803	0	6	0	1	4	14	8	9	24	0	20	0	0	0	0	0	29	0	0	0	0	0	0	0	0	0	0	93	0	0	0	0	0	0	0	0	0	0	0	0	32	0	0	0	0	0	0	0	0
OTU1083	0	0	7	8	1	7	0	21	31	10	0	32	0	15	3	19	2	1	0	46	0	0	1	2	0	2	2	12	15	4	2	0	0	34	2	0	2	0	31	78	10	1	122	42	22	25	0	0	0
OTU10838	10	7	18	13	21	12	14	12	16	0	0	0	6	1	0	1	1	2	28	0	2	0	2	0	28	0	0	0	18	18	0	16	1	0	0	0	0	24	43	1	0	1	22	1	1	0	0	0	0
OTU1084	0	0	0	0	0	0	0	0	0	0	0	1	11	0	0	0	0	0	0	1	0	0	0	28	0	0	0	0	0	27	54	1	0	0	0	0	0	0	0	0	0	0	0	44	0	0	0	0	0
OTU1085	20	2	0	6	14	37	0	24	11	24	1	0	4	5	31	93	29	1	28	0	30	0	1	0	4	1	20	0	1	0	19	38	58	0	0	0	29	0	49	88	1	24	4	0	0	0	34	46	0
OTU10866	11	20	23	7	32	11	10	37	30	1	1	4	0	1	10	1	38	67	1	1	19	32	0	0	2	0	5	31	10	0	24	1	0	0	0	42	14	56	0	0	19	16	46	23	2	28	34	0	25
OTU1088	2	0	1	9	2	8	15	3	4	0	8	4	0	26	19	15	36	52	0	106	10	33	79	39	0	1	1	0	52	13	20	24	0	88	1	32	0	84	0	2	0	17	0	0	0	0	35	0	26
OTU109	520	430	419	280	416	378	360	428	312	48	6	31	0	47	9	2	124	45	72	3	243	47	105	34	78	107	119	132	49	68	48	307	48	0	7	141	22	63	56	86	155	14	109	38	66	31	35	127	65
OTU1090	3	0	0	0	0	5	0	0	0	0	0	8	0	0	0	0	0	52	0	0	21	0	0	50	0	0	0	0	0	12	0	0	0	0	0	20	0	0	16	7	0	0	0	0	0	0	0	0	0
OTU10900	0	2	0	1	0	13	12	0	11	1	0	1	0	30	28	1	0	0	0	38	0	0	0	0	0	0	1	0	1	0	31	0	2	0	53	79	0	1	51	1	0	3	0	2	15	0	0	0	0
OTU1092	23	21	0	24	0	2	0	4	10	0	10	5	0	0	3	0	2	151	0	1	1	21	1	0	88	0	1	1	20	1	0	1	49	0	0	0	31	35	41	1	3	30	4	0	57	111	10	0	0
OTU1093	0	0	1	10	7	11	21	19	0	0	9	11	0	0	0	0	0	0	44	0	0	11	0	0	11	0	0	0	0	0	0	0	0	22	0	11	0	0	0	9	39	1	0	0	0	21	2	5	0
OTU1096	1	19	2	16	2	17	0	0	11	0	0	3	0	0	3	0	0	1	0	0	0	11	1	3	1	1	28	28	7	11	1	1	3	1	0	0	0	1	0	0	1	0	33	0	0	0	0	0	24
OTU10988	50	19	21	72	68	39	92	77	45	2	2	14	88	1	25	50	0	0	41	23	0	0	0	28	0	11	102	0	0	11	34	30	27	0	39	40	15	0	0	0	48	2	69	53	26	46	90	39	2
OTU1099	6	16	29	22	17	5	11	26	35	0	0	0	0	0	21	22	0	0	25	27	6	0	0	0	3	0	0	0	0	37	0	0	1	0	0	0	0	0	21	1	0	5	12	47	0	1	0	0	0
OTU11	269	257	329	311	202	199	234	285	345	141	150	128	156	528	546	1370	574	603	946	706	560	570	337	825	411	475	560	763	388	728	825	675	1605	956	1035	670	517	819	817	855	935	769	910	379	608	830	727	1643	980
OTU110	154	222	191	163	71	110	172	146	138	73	55	102	34	285	251	180	410	514	332	276	265	217	153	155	168	174	240	163	430	238	202	439	354	390	252	320	431	177	429	289	353	415	333	269	174	297	300	403	328
OTU1100	30	18	29	0	7	7	36	13	39	0	0	0	24	0	1	0	0	0	2	0	0	0	0	0	37	0	1	0	0	0	0	0	0	35	0	0	26	24	0	0	1	0	0	0	1	0	0	1	0
OTU1101	0	1	0	0	0	0	0	0	0	0	0	0	3	0	38	0	0	1	0	26	0	0	45	0	16	0	38	0	0	0	0	0	0	0	0	0	0	0	0	0	0	0	0	0	0	42	0	0	0
OTU1103	8	25	5	34	0	20	7	6	34	14	0	2	3	0	0	0	0	0	0	0	0	0	0	0	40	0	0	0	1	0	0	0	0	0	0	0	0	1	0	0	0	1	0	0	0	63	0	0	1
OTU1105	0	0	25	0	0	7	1	10	8	11	0	0	0	10	31	0	0	0	0	0	19	0	15	0	0	1	0	0	7	0	0	0	1	0	0	0	22	20	0	1	0	0	0	0	4	0	0	0	0
OTU1107	0	8	0	10	0	0	0	0	0	1	2	0	0	20	1	0	1	34	0	70	24	0	0	0	0	0	33	86	6	0	0	0	0	0	0	1	0	0	1	0	1	0	0	0	36	0	0	0	0
OTU111	21	2	0	0	7	8	8	36	19	1	13	9	0	32	0	85	44	60	81	0	0	25	0	82	0	16	105	0	10	0	32	64	30	0	0	30	35	140	0	34	41	28	59	1	0	52	91	1	0
OTU1110	0	0	5	0	0	0	0	0	0	7	0	1	0	0	0	0	0	36	0	0	0	33	0	1	0	0	0	0	0	23	25	0	0	0	0	0	0	23	0	0	0	0	0	0	11	0	0	0	0
OTU1114	12	0	10	1	20	11	22	18	13	0	0	0	0	0	0	0	0	0	43	0	0	0	0	0	0	0	0	0	0	0	0	0	0	0	0	0	0	0	0	0	0	0	0	0	0	0	0	0	0
OTU1115	0	0	0	1	6	0	0	8	0	0	0	0	2	1	0	2	43	3	1	0	1	1	55	30	2	0	2	15	0	0	39	5	170	0	2	5	3	1	0	0	1	1	1	2	0	0	0	3	0
OTU1117	19	14	29	13	4	11	3	13	7	0	0	4	0	0	0	0	0	0	6	0	0	19	0	0	0	0	0	0	10	26	0	0	22	2	0	0	20	0	0	0	0	0	0	0	0	0	19	0	0
OTU1118	0	0	13	0	3	0	0	0	0	0	0	2	0	0	1	1	0	1	0	4	0	0	32	0	1	20	1	35	0	0	0	0	1	32	0	0	0	0	32	1	0	0	0	2	0	32	0	50	78
OTU1119	0	0	0	0	0	0	0	0	0	0	11	0	0	0	0	8	0	0	0	0	0	13	0	14	0	0	0	0	17	0	0	0	0	0	0	0	0	0	35	0	0	0	0	0	0	0	0	0	0
OTU112	40	53	40	32	14	69	29	30	46	1	8	12	2	5	26	6	8	2	77	75	6	5	48	5	33	18	81	52	51	82	66	71	6	4	42	2	2	34	1	92	82	23	30	2	21	48	0	30	13
OTU1120	15	11	8	13	8	0	12	0	0	0	0	16	0	0	26	1	0	0	0	0	0	0	1	0	0	1	0	0	1	0	0	0	0	0	0	1	0	1	0	0	27	0	1	0	33	0	0	1	0
OTU1121	10	20	2	0	0	0	0	0	0	0	0	0	0	0	0	0	0	0	0	0	0	2	0	0	26	0	0	0	0	0	0	0	30	0	0	0	0	3	0	0	0	0	0	0	0	0	0	0	0
OTU1124	19	0	0	14	10	1	2	27	40	0	0	1	0	0	0	0	0	0	0	1	0	0	0	0	48	0	0	0	0	0	0	0	0	0	0	0	0	0	0	1	0	0	0	0	0	0	0	0	0
OTU1125	0	0	7	3	16	12	8	0	0	0	1	0	0	0	0	0	0	0	24	2	1	15	15	0	0	0	23	0	0	0	30	1	0	1	54	0	0	52	16	42	0	0	26	0	32	34	0	0	65
OTU11268	14	1	0	7	5	5	1	0	0	0	0	8	0	0	0	0	0	0	0	0	0	19	0	41	31	0	0	17	0	0	0	0	0	0	0	0	0	0	0	0	0	0	0	1	0	0	0	0	0
OTU1127	0	11	1	0	0	1	9	0	0	0	16	1	0	69	0	79	21	0	70	0	1	1	0	1	0	22	67	0	0	1	31	0	24	0	0	2	0	0	0	1	0	0	1	41	0	0	0	0	0
OTU1129	0	0	0	0	0	0	0	0	0	0	4	0	0	6	0	27	0	46	0	0	0	0	0	37	0	1	0	29	0	14	0	0	0	0	80	0	0	0	0	0	0	0	31	0	0	0	0	0	0
OTU113	35	47	2	22	23	2	46	15	17	0	2	14	40	37	7	62	0	0	135	20	55	186	0	82	1	21	125	30	54	187	48	3	0	70	0	16	0	71	0	2	38	0	18	18	57	41	55	36	82
OTU1130	12	1	0	0	6	0	0	0	15	0	0	0	0	0	1	0	46	0	1	0	0	29	44	0	0	11	26	0	0	1	0	0	14	22	1	1	34	0	0	0	0	0	0	1	0	0	29	0	0
OTU1133	0	12	21	14	18	2	0	0	0	0	0	0	92	0	0	0	0	0	0	0	0	0	0	0	0	0	0	0	0	0	0	0	0	0	2	0	0	0	0	0	0	1	38	0	0	0	0	0	0
OTU1135	0	0	14	2	0	6	0	0	0	0	13	0	10	0	0	0	38	0	0	4	0	1	29	0	0	15	0	74	0	0	0	0	0	113	0	0	0	145	67	0	0	15	0	0	0	0	0	0	24
OTU11359	19	0	0	0	16	9	0	0	12	0	3	2	6	0	1	2	0	2	0	1	1	1	1	1	0	18	86	13	0	13	2	1	0	0	59	0	0	0	0	4	0	48	0	0	52	0	0	0	53
OTU1136	15	0	0	0	1	5	4	0	0	0	0	2	0	11	0	47	0	0	0	0	10	15	12	0	0	32	4	0	11	32	0	21	0	0	37	19	13	1	0	61	38	13	26	0	26	0	0	0	0
OTU1137	0	0	1	1	0	0	0	2	11	0	0	0	0	25	10	0	0	0	0	101	21	0	0	0	0	0	55	0	0	11	0	35	0	0	0	0	36	0	0	0	0	0	0	0	22	0	30	0	30
OTU114	42	83	31	44	44	59	30	38	68	30	29	33	22	23	117	45	15	13	44	7	22	12	43	129	135	96	30	51	69	207	50	55	223	90	97	154	40	96	81	19	102	37	7	32	125	63	68	75	152
OTU1140	21	0	0	2	0	5	0	0	1	0	0	7	0	44	0	0	41	0	0	12	0	0	21	20	0	0	0	0	0	0	0	0	0	0	0	0	0	0	0	2	3	0	0	0	19	0	0	0	0
OTU1145	0	0	5	0	0	0	0	0	0	0	0	5	17	19	0	2	9	0	1	0	0	0	0	0	0	0	0	37	14	0	0	0	0	0	0	37	0	1	0	0	58	0	0	0	0	0	51	44	15
OTU1146	0	0	0	0	0	0	0	0	0	0	0	0	4	1	0	0	0	10	0	33	71	0	0	0	0	0	0	0	0	0	43	0	0	20	0	0	0	0	0	47	0	0	0	1	0	0	0	0	0
OTU11488	0	2	0	5	8	0	9	0	0	0	0	0	9	2	0	15	27	0	0	0	0	29	19	37	4	26	61	1	13	118	30	0	40	1	80	16	1	1	0	1	1	1	0	0	47	0	41	0	0
OTU1149	3	0	0	3	0	1	3	0	2	13	12	0	0	0	0	0	1	0	0	0	0	0	0	0	0	0	0	0	0	0	10	0	45	0	40	0	36	0	0	98	0	0	0	21	7	33	0	5	1
OTU115	286	190	150	161	179	214	126	143	177	1	0	0	0	0	1	1	0	0	1	2	1	1	0	0	9	0	0	0	1	0	0	0	0	0	1	1	0	0	0	0	0	0	0	0	0	0	0	0	0
OTU11501	12	8	5	27	13	8	0	0	9	1	0	0	0	0	0	0	0	0	14	0	0	0	1	19	2	0	0	0	0	0	0	0	0	0	0	0	0	0	0	1	0	0	0	0	23	0	10	0	0
OTU1152	0	9	0	11	0	6	0	1	0	0	0	0	0	1	0	1	0	0	0	0	0	33	0	0	0	1	0	0	0	0	0	0	1	0	0	0	34	0	0	0	0	0	0	0	27	0	0	0	26
OTU1154	0	1	1	0	0	4	5	1	24	1	0	0	0	1	31	1	2	0	0	2	1	1	1	10	22	3	0	4	6	0	35	3	0	0	30	0	0	0	0	48	1	0	0	0	1	35	0	0	0
OTU1155	33	4	31	36	39	25	6	33	11	32	21	25	18	0	60	48	49	3	8	14	80	2	4	41	0	5	41	85	0	51	4	50	129	122	90	2	5	71	26	19	3	11	2	0	64	47	64	1	55
OTU1158	1	0	0	0	1	3	8	0	0	6	0	0	0	0	0	3	1	0	0	2	16	0	0	30	2	27	1	1	0	9	44	34	116	0	0	0	0	2	35	0	2	15	0	0	29	0	0	71	0
OTU1159	0	0	0	0	0	0	0	0	0	0	15	0	0	2	49	36	61	1	17	0	51	4	0	56	0	12	168	0	75	34	33	1	91	0	31	3	57	42	60	44	3	1	0	0	18	1	0	16	0
OTU116	88	93	74	63	128	47	118	195	129	9	3	5	1	56	59	20	43	5	41	7	3	4	18	46	2	21	28	1	29	54	3	53	58	47	29	22	40	5	79	8	0	1	3	7	47	4	42	16	5
OTU1160	14	7	32	0	10	8	4	1	5	3	0	11	4	0	0	0	0	23	20	17	1	0	1	33	1	0	0	0	0	0	0	0	0	0	0	0	16	1	0	0	0	0	0	0	0	0	0	0	0
OTU11604	5	11	1	1	4	1	1	7	2	0	2	1	0	0	25	1	0	2	2	4	0	0	0	12	0	0	1	45	0	4	0	1	0	1	1	1	1	14	0	0	1	0	0	3	21	0	0	0	0
OTU1165	12	40	0	0	0	0	0	1	0	0	0	0	0	0	0	0	0	0	0	0	0	0	0	0	63	0	76	1	10	0	1	1	2	40	0	0	1	38	0	46	0	0	0	0	0	45	0	0	0
OTU1166	7	0	0	1	0	0	12	0	0	0	0	0	0	0	0	0	0	0	0	0	0	0	0	0	0	0	0	0	16	0	0	0	0	69	0	0	0	0	0	1	0	0	0	1	18	0	0	0	0
OTU1167	1	6	0	13	0	0	1	0	8	0	0	0	0	0	0	0	1	1	0	0	0	0	0	33	0	0	0	42	32	0	0	35	0	0	0	0	34	0	0	0	0	0	37	0	22	0	37	0	0
OTU1168	0	3	7	0	0	12	13	1	0	0	11	1	25	26	1	1	46	2	0	0	1	2	0	3	38	44	41	0	89	65	0	2	1	57	1	1	52	0	0	0	30	36	32	0	0	0	0	0	0
OTU117	0	4	11	17	39	43	17	32	73	16	14	0	11	10	72	41	67	3	1	26	18	20	31	43	56	2	43	59	39	121	25	1	3	127	0	56	46	63	40	0	150	1	31	55	39	23	19	1	0
OTU1170	0	10	0	3	0	7	0	0	0	0	0	6	0	0	0	2	0	0	47	1	0	0	0	1	0	0	33	0	0	0	0	0	1	23	0	0	0	1	0	0	1	0	0	0	46	0	0	0	0
OTU1171	8	5	23	16	14	26	17	17	8	0	0	0	0	0	0	0	0	0	0	0	0	0	0	31	0	0	0	0	0	0	0	0	0	0	0	0	0	0	0	0	0	0	0	0	0	0	0	0	0
OTU1172	0	0	20	0	0	0	0	0	0	0	0	0	0	0	0	0	0	0	0	0	0	0	0	21	0	0	0	0	0	14	0	0	0	0	0	0	0	27	0	0	0	0	22	15	0	0	0	0	15
OTU1173	9	0	21	13	0	7	5	18	17	0	0	6	0	0	16	0	18	0	2	0	20	0	64	34	0	0	2	37	0	0	0	0	0	0	0	0	0	1	0	68	36	9	39	0	0	32	0	66	0
OTU1174	15	9	14	0	9	2	7	23	0	0	0	3	1	33	0	19	2	1	0	0	4	0	0	0	1	0	0	0	2	1	1	2	0	1	0	1	1	0	0	0	0	6	97	15	1	0	27	46	0
OTU1175	37	15	9	16	7	5	2	32	3	1	2	0	0	2	29	2	0	43	0	1	2	1	62	51	126	15	26	0	20	2	1	0	0	59	0	0	0	0	0	0	27	0	0	0	13	38	0	0	0
OTU1176	15	7	1	2	33	15	1	34	1	7	1	2	0	5	3	3	0	2	2	11	26	2	13	59	3	1	0	1	21	20	43	0	97	25	38	34	10	49	49	117	1	9	63	4	35	0	42	36	2
OTU1177	0	0	0	13	0	0	6	0	0	0	0	14	0	0	0	0	0	0	0	0	0	0	0	0	22	20	47	40	1	0	0	0	0	1	0	0	1	0	0	0	0	0	0	36	0	0	0	0	25
OTU118	221	223	257	219	264	198	202	162	216	1	0	2	6	23	1	2	0	2	1	2	0	0	0	0	1	50	0	0	0	0	5	0	1	1	0	1	1	0	0	0	0	0	0	0	0	0	0	0	0
OTU1183	9	0	11	0	0	0	0	0	0	0	0	4	23	0	0	1	0	0	0	0	0	13	0	0	0	0	3	0	10	0	0	0	0	0	0	0	0	0	141	0	0	0	0	0	0	68	0	0	0
OTU1185	0	0	0	1	0	0	0	0	1	0	0	0	0	56	2	0	0	0	1	68	34	0	0	29	0	0	2	1	13	0	0	0	67	0	0	1	36	0	0	0	40	0	0	0	20	0	0	0	0
OTU1186	1	1	0	0	16	0	0	0	0	0	0	0	0	0	1	1	1	0	0	40	0	0	1	1	40	0	0	2	0	18	0	1	1	0	1	33	0	1	0	0	30	0	0	0	0	0	0	0	0
OTU1189	4	0	5	2	0	0	0	0	0	0	0	0	1	0	24	67	1	25	0	3	0	0	0	20	50	0	0	1	38	31	1	1	58	0	1	0	0	0	0	1	0	0	20	0	0	24	1	0	0
OTU119	4	1	11	20	46	7	9	0	11	9	4	24	0	13	43	2	47	75	121	62	38	42	29	60	45	0	0	133	21	27	28	63	123	0	77	18	0	20	0	46	135	114	76	11	1	36	62	0	15
OTU1195	0	0	5	12	20	0	0	0	0	1	0	9	0	0	0	0	0	0	0	0	0	0	0	0	0	19	0	1	0	0	3	0	33	0	0	3	0	0	1	1	0	2	0	0	0	0	0	49	0
OTU1197	0	28	0	7	7	0	0	0	0	1	0	0	0	0	22	0	0	0	0	0	0	0	3	0	29	0	0	21	0	0	21	0	51	0	0	0	0	0	0	25	0	45	0	0	32	0	78	0	0
OTU1199	24	13	30	4	7	3	6	6	9	0	0	0	1	0	0	0	0	18	30	0	0	32	0	14	0	0	29	0	1	28	0	0	0	0	0	0	0	1	0	0	0	0	0	0	0	0	0	0	0
OTU11990	0	2	8	0	4	24	0	0	0	0	0	0	0	19	0	1	0	1	0	0	1	1	0	0	0	12	0	0	2	3	0	0	2	0	0	0	0	13	2	0	4	0	17	0	21	1	38	0	2
OTU12	326	294	298	303	415	280	211	297	485	491	247	140	213	1051	910	393	311	316	431	501	298	310	504	235	307	126	207	447	692	554	691	412	238	471	238	357	326	944	855	556	384	260	333	348	513	1198	1073	914	516
OTU120	22	24	9	9	1	28	0	0	34	6	0	0	0	49	50	35	0	0	23	0	2	1	37	0	36	18	104	68	9	16	1	57	0	75	0	116	0	39	0	153	198	42	0	26	41	0	70	21	60
OTU1200	16	17	9	0	0	24	33	25	46	0	11	0	0	0	0	0	0	0	0	0	0	0	0	0	0	0	0	0	0	0	0	0	0	0	0	0	0	0	0	0	0	0	0	0	20	0	0	0	0
OTU12006	0	0	16	2	0	0	4	0	0	0	0	9	0	0	46	0	0	0	31	1	0	23	6	18	1	0	7	0	29	1	43	0	0	0	36	1	0	0	0	0	0	0	1	22	3	36	0	0	41
OTU1201	0	28	9	4	2	0	0	3	0	0	0	0	0	0	0	0	0	0	0	0	0	0	1	0	0	0	0	64	5	14	1	0	1	68	0	0	0	0	0	0	0	0	0	0	0	0	0	0	0
OTU1205	0	0	0	0	0	0	0	1	0	0	0	0	0	2	1	40	32	0	0	0	1	0	0	48	1	19	1	0	26	0	1	1	39	28	0	22	0	39	0	52	48	0	22	0	0	22	0	0	1
OTU1207	2	11	2	16	12	5	0	20	0	0	0	0	4	4	21	45	25	1	113	56	17	43	1	1	44	7	3	0	11	4	94	1	1	3	31	37	24	1	32	38	66	0	31	0	2	14	0	1	0
OTU1208	0	0	0	0	0	0	0	0	0	0	0	1	2	0	0	0	0	0	0	3	0	0	6	0	0	0	0	0	0	1	0	0	0	0	0	0	33	0	0	0	0	0	18	0	0	0	0	104	0
OTU1209	0	7	1	5	6	0	6	4	11	8	0	0	3	12	1	0	34	0	1	1	6	0	0	0	1	0	39	0	0	0	0	35	1	0	25	2	99	49	0	0	0	28	56	0	0	0	0	0	0
OTU121	12	10	19	19	19	1	9	21	34	14	13	7	47	25	94	116	18	60	0	31	62	11	0	86	197	0	30	61	45	71	11	27	92	0	38	0	86	0	39	40	50	81	45	0	18	91	84	0	37
OTU1211	18	1	7	0	0	7	0	0	1	1	0	0	0	0	2	2	1	47	0	1	0	0	0	0	1	19	0	21	13	0	0	0	0	0	0	3	58	0	47	0	39	35	70	0	0	0	0	0	0
OTU1213	19	13	8	8	3	12	0	0	0	0	0	0	9	11	0	0	0	0	0	0	0	0	13	0	0	0	15	0	0	0	59	0	0	0	0	0	15	2	0	2	0	0	25	0	1	28	0	0	0
OTU1216	16	4	26	19	19	3	13	6	38	3	4	0	0	1	0	1	0	18	1	3	0	1	1	7	0	14	1	1	1	22	57	1	44	0	0	0	0	22	67	1	41	0	31	4	11	24	0	41	0
OTU12163	0	0	1	5	1	20	6	1	0	0	0	1	0	1	0	1	41	0	0	3	69	0	0	0	1	36	1	36	0	10	52	0	0	0	0	0	0	0	0	0	1	0	1	1	1	74	0	0	0
OTU1219	1	0	0	0	0	0	0	0	0	0	0	0	0	36	1	0	18	0	0	0	0	0	0	18	49	0	33	0	0	0	0	0	0	32	39	0	1	45	0	0	0	0	0	1	11	0	0	0	0
OTU122	30	20	10	36	21	29	45	7	29	13	9	14	11	0	17	20	123	9	0	102	109	3	1	22	47	50	139	49	3	83	18	1	0	1	71	60	1	26	32	84	0	101	41	18	0	45	40	32	6
OTU1220	4	15	0	8	13	2	7	1	0	0	0	1	2	0	4	2	0	2	24	5	5	1	0	0	52	22	1	103	3	63	1	43	2	4	56	1	2	53	1	0	0	0	1	29	0	71	40	0	0
OTU1221	11	0	5	1	13	0	0	0	0	0	0	6	0	1	1	0	54	0	23	0	0	0	12	0	25	0	23	29	0	0	0	0	0	1	17	49	30	15	0	0	0	0	0	0	0	62	0	1	15
OTU1223	0	0	0	0	0	0	0	3	0	0	11	0	0	0	0	0	0	0	28	0	0	0	0	23	0	0	0	0	10	0	0	0	0	0	0	2	3	0	0	41	0	0	0	0	23	0	0	0	0
OTU1225	1	1	2	8	4	22	8	29	3	8	0	1	1	31	50	9	9	11	1	4	0	0	2	39	5	3	0	48	39	2	1	5	5	5	3	4	1	51	1	0	0	0	0	0	5	0	1	50	0
OTU123	23	61	61	65	23	78	49	14	58	25	5	12	43	70	144	190	35	1	40	111	58	139	17	127	59	15	41	1	71	180	210	31	318	92	32	67	140	124	88	161	18	67	42	114	45	19	106	117	161
OTU1231	0	0	0	0	0	1	0	0	0	2	0	3	10	0	31	34	48	2	0	2	23	0	11	0	0	6	0	0	71	18	0	0	0	59	32	28	0	78	44	0	150	21	30	0	0	5	0	2	0
OTU1233	38	16	0	24	12	8	0	0	0	3	1	5	0	0	27	16	2	4	0	29	52	0	11	0	1	0	1	113	23	2	60	2	115	46	1	1	1	0	0	44	0	0	32	0	0	0	67	0	1
OTU1234	0	8	17	10	2	18	16	12	13	0	5	0	7	0	0	15	21	0	25	1	0	0	12	0	12	0	20	45	9	0	38	0	0	1	0	0	25	9	0	0	0	0	0	0	0	0	10	4	17
OTU1235	0	10	9	0	5	16	0	0	2	0	25	2	1	1	0	70	2	3	2	1	32	2	4	0	2	3	0	70	26	1	0	1	0	0	0	0	0	0	0	5	77	14	0	1	1	58	0	0	0
OTU1237	6	37	13	10	0	5	7	14	16	0	0	0	0	29	0	0	0	8	1	1	21	0	0	0	0	0	0	35	0	6	0	1	0	11	0	14	15	0	0	0	0	49	1	1	0	0	0	0	26
OTU1238	0	0	13	0	0	0	8	0	0	0	0	0	0	0	0	0	36	0	100	0	35	0	0	0	0	0	0	0	0	0	0	0	0	0	1	0	0	0	0	0	0	1	0	0	0	0	0	0	0
OTU1239	28	21	25	7	31	5	12	6	39	13	3	5	0	2	9	78	0	4	18	65	82	19	28	52	28	0	0	110	0	81	27	20	58	21	27	11	0	19	30	8	56	1	41	1	74	4	28	1	122
OTU124	14	51	35	35	50	50	33	14	25	8	10	3	11	39	27	14	0	1	59	148	2	82	99	0	32	33	62	42	43	89	12	52	1	145	123	40	2	84	3	0	36	33	66	135	32	63	10	62	63
OTU1240	0	0	0	0	7	2	15	0	0	0	0	10	0	0	0	0	0	0	0	1	0	6	0	0	1	0	37	0	0	0	46	0	0	1	33	0	0	0	25	1	0	1	0	0	0	0	0	0	28
OTU12404	10	9	6	11	2	32	26	0	15	19	0	15	0	0	18	0	0	0	0	0	56	0	0	0	0	37	49	1	39	1	0	25	107	0	22	0	1	0	0	0	0	35	22	0	21	76	1	8	0
OTU1245	3	11	9	7	12	2	7	0	9	1	0	0	1	0	0	1	2	26	0	0	0	0	22	0	1	0	0	0	18	6	1	1	0	0	1	0	1	0	0	0	0	0	0	0	0	0	21	0	0
OTU1247	3	0	0	0	14	4	0	0	0	0	0	0	1	1	46	0	0	51	1	0	1	0	0	0	0	30	0	65	60	0	0	0	0	0	0	0	81	0	0	0	0	31	0	0	18	0	0	0	0
OTU12476	0	0	0	0	14	0	5	24	0	0	0	0	0	1	0	0	0	52	0	1	0	11	0	38	0	0	0	0	10	0	35	0	0	26	0	0	15	0	0	0	0	0	0	0	15	28	66	30	0
OTU12478	0	3	0	0	0	31	1	0	0	0	0	1	1	0	25	2	1	1	0	5	3	2	0	40	0	0	0	0	3	2	0	1	0	0	0	0	0	0	25	1	1	1	31	42	0	0	1	0	0
OTU1249	1	1	3	6	0	9	0	0	1	0	0	13	1	5	3	2	2	3	2	1	2	2	2	0	0	1	0	22	3	21	2	69	1	48	5	1	12	2	0	0	1	0	1	0	2	19	0	64	0
OTU125	118	149	185	105	110	126	99	233	117	20	1	1	2	0	0	1	1	0	0	0	0	1	0	0	0	0	0	0	0	1	0	0	1	1	1	0	1	0	0	1	0	0	0	0	0	0	0	0	0
OTU1250	18	0	0	0	3	14	0	9	0	0	4	0	0	0	40	0	1	3	1	1	41	0	0	14	1	27	0	0	1	23	2	0	0	1	0	36	0	13	25	36	0	23	0	0	32	0	0	1	14
OTU1251	12	9	5	15	0	3	0	0	0	0	0	0	0	0	0	0	0	0	0	0	39	22	1	0	0	0	36	0	0	0	0	0	0	0	0	0	0	23	0	0	0	0	31	0	0	0	0	0	0
OTU1252	18	10	8	2	0	0	17	0	15	0	0	5	0	0	0	17	0	0	0	0	1	0	1	6	3	2	1	2	6	0	14	0	0	1	0	0	32	33	0	0	0	4	0	1	1	0	0	0	0
OTU1253	1	5	5	8	11	0	0	0	0	0	0	0	5	0	0	0	0	0	0	33	19	0	0	0	0	0	0	0	8	0	0	21	0	0	0	1	140	0	0	26	0	40	0	0	0	0	0	0	0
OTU1255	28	0	17	12	16	9	0	7	8	4	0	0	0	0	0	0	0	7	32	12	0	0	0	0	0	0	0	0	0	0	0	0	0	0	0	0	0	0	0	0	0	0	0	0	0	5	1	0	0
OTU1256	3	0	12	0	7	1	0	13	5	11	0	0	21	30	0	0	12	16	0	26	0	0	0	3	11	0	0	0	8	45	0	0	0	0	0	19	0	3	34	2	0	53	0	49	79	0	30	0	0
OTU1257	0	1	0	0	8	0	0	4	0	0	0	0	0	16	16	0	0	0	73	0	21	0	0	0	0	15	0	0	0	0	70	0	40	0	0	0	28	5	1	0	0	0	1	45	1	31	0	0	0
OTU12586	5	1	0	1	0	37	0	2	1	1	0	14	0	0	0	1	1	1	0	0	0	0	1	0	13	7	45	0	31	28	0	0	0	1	0	2	0	59	0	1	38	17	13	0	0	5	2	4	4
OTU126	13	25	54	17	8	34	19	25	25	11	0	24	13	32	0	0	11	1	0	87	30	13	106	19	39	1	0	1	4	145	52	0	0	64	59	0	0	0	108	43	38	0	0	0	132	45	0	0	30
OTU12601	14	5	3	1	10	21	2	28	10	0	0	6	22	79	1	7	4	65	23	14	41	10	2	0	1	1	31	197	12	0	0	32	0	49	26	28	25	28	22	0	133	31	0	66	35	18	1	23	28
OTU1261	2	16	11	2	4	1	2	1	9	0	0	0	0	1	2	0	3	0	0	0	0	0	0	0	0	0	0	0	1	1	0	0	0	0	0	0	25	1	3	0	1	0	0	0	0	0	21	0	18
OTU1262	25	1	0	0	0	1	0	18	0	0	0	0	0	0	0	2	4	0	1	0	0	0	29	37	1	0	0	1	12	0	0	0	0	0	0	0	1	36	0	0	0	0	0	0	14	2	48	0	0
OTU1264	1	10	6	8	21	6	31	6	0	17	9	13	0	0	53	4	36	0	22	0	0	7	0	0	0	1	1	0	3	19	1	1	10	0	3	5	19	0	0	0	2	8	43	0	0	1	1	10	0
OTU12660	42	23	50	1	11	19	23	38	18	0	0	2	0	1	0	0	0	0	0	23	18	0	36	1	0	1	13	20	11	0	0	0	0	31	0	3	0	0	0	0	0	0	27	2	20	16	0	0	0
OTU1267	0	0	26	5	23	0	0	27	18	0	15	0	18	1	1	4	25	1	2	3	69	2	1	48	2	36	61	1	3	19	37	3	3	2	1	85	79	0	0	2	110	22	1	1	2	0	0	0	0
OTU127	43	30	0	9	10	9	36	25	5	20	14	4	0	21	17	51	53	0	36	1	79	31	106	85	43	45	65	55	59	15	75	94	69	59	63	22	58	96	5	31	0	79	4	2	14	3	99	102	120
OTU1271	0	3	0	0	17	0	12	0	0	0	0	1	0	0	0	0	0	0	0	0	0	0	0	1	88	1	14	0	29	0	0	0	0	71	0	0	1	0	0	0	0	0	40	0	0	0	0	0	0
OTU1272	0	1	0	0	6	0	0	0	3	6	6	0	0	3	0	0	33	0	15	0	0	36	10	0	0	0	1	2	23	0	0	38	0	0	0	0	0	65	0	0	0	0	0	16	20	0	0	0	21
OTU1276	0	0	5	3	0	0	0	7	0	3	10	9	0	0	3	3	27	8	17	9	6	5	6	37	0	10	0	18	8	6	1	7	45	1	10	8	0	6	20	8	33	12	18	7	8	14	8	41	14
OTU1277	0	10	0	0	0	0	9	0	6	0	0	2	0	13	1	0	0	0	0	2	0	0	0	1	0	0	86	0	0	50	0	0	0	0	0	0	0	0	0	0	0	0	0	0	0	46	0	0	0
OTU1278	0	0	0	0	0	19	0	0	0	0	16	2	0	1	1	0	31	0	0	0	0	0	1	0	0	13	0	0	24	0	0	0	0	42	59	102	30	0	0	2	0	0	0	0	0	0	0	41	43
OTU128	55	4	27	58	22	51	6	17	60	9	3	2	22	35	0	20	56	0	2	60	28	0	0	23	0	0	21	33	1	0	64	25	26	0	0	0	0	36	26	62	42	13	0	0	47	0	0	45	0
OTU12808	0	0	0	0	0	0	0	0	0	0	0	0	0	0	1	0	0	0	0	0	0	0	0	0	0	0	0	1	1	0	54	0	37	0	0	0	0	0	0	0	0	0	30	0	0	0	0	0	0
OTU1282	11	6	0	0	0	3	0	0	6	0	0	0	0	0	0	0	42	0	0	0	0	1	24	25	3	0	0	1	0	0	0	0	0	1	0	0	3	0	0	0	1	0	0	0	1	0	0	48	41
OTU1285	0	0	3	0	5	0	0	0	0	0	11	15	0	1	0	0	1	1	0	0	0	38	0	11	1	0	0	0	18	0	0	0	0	44	23	39	1	0	36	1	65	0	0	0	0	0	52	53	0
OTU12850	0	0	11	0	0	0	0	0	0	0	0	0	5	0	0	27	0	0	0	0	24	0	0	18	18	0	68	52	0	0	0	0	0	0	0	0	0	0	0	0	0	0	21	66	19	0	0	0	0
OTU129	78	47	18	25	74	70	73	44	62	35	3	5	22	16	0	6	2	71	22	2	17	62	48	37	52	38	136	151	18	28	74	56	2	33	45	0	34	123	4	0	166	4	39	1	93	31	42	28	43
OTU1290	6	11	4	9	2	9	0	6	0	0	0	5	0	0	0	25	42	0	0	0	0	0	16	0	0	0	0	0	0	17	1	0	1	0	1	47	57	2	34	0	0	1	25	66	0	0	0	64	36
OTU1295	0	16	8	0	23	20	0	0	0	0	12	0	0	0	1	0	0	1	0	0	0	0	1	0	1	13	0	1	2	0	0	0	0	0	0	0	0	64	0	0	23	0	0	0	1	0	0	0	0
OTU13	1710	1920	2002	1885	2253	1494	1788	1910	2002	57	73	44	180	252	381	158	408	197	178	172	491	317	218	436	190	214	106	160	208	238	74	254	188	149	226	79	267	341	295	303	372	61	239	121	224	351	159	295	237
OTU130	0	6	0	12	6	10	8	22	0	25	39	21	14	118	28	2	49	88	114	0	66	179	82	75	1	2	0	126	83	311	90	41	0	0	34	132	0	129	89	51	191	73	47	2	166	70	19	0	183
OTU1301	0	17	0	0	5	2	0	8	0	0	5	0	0	0	0	0	2	0	147	16	1	0	26	1	13	0	13	0	0	1	0	0	0	0	67	0	8	1	0	2	2	0	0	0	0	0	7	3	23
OTU1303	10	1	1	15	62	14	13	2	7	26	11	3	10	44	3	21	9	81	1	0	0	55	17	49	58	3	1	3	88	113	22	70	63	1	69	63	97	9	17	21	5	12	120	4	17	2	58	16	56
OTU13038	0	0	0	0	0	1	0	0	20	2	0	0	0	2	1	0	0	0	0	1	28	68	19	1	0	0	0	0	39	1	1	0	0	1	0	2	51	32	0	50	91	1	34	35	0	0	2	0	0
OTU1305	8	0	0	12	16	41	0	16	21	0	2	0	9	1	1	0	1	0	0	0	0	0	11	0	0	0	11	0	0	0	0	0	81	0	0	0	0	1	0	0	0	0	28	1	0	40	30	0	0
OTU1307	8	0	11	14	0	0	0	0	17	0	0	0	0	0	20	0	0	0	0	69	32	0	0	20	1	0	0	34	0	1	0	0	0	1	0	0	0	0	0	0	0	0	0	0	1	0	14	0	0
OTU1308	0	0	0	0	0	0	0	6	0	0	0	0	0	0	25	62	0	0	0	2	0	1	0	0	0	46	0	0	0	0	0	0	0	0	0	33	0	0	82	0	0	1	1	29	0	0	0	0	0
OTU131	59	71	62	75	83	63	37	62	41	10	0	1	17	15	18	72	27	33	69	53	0	23	45	58	21	1	127	38	76	28	144	37	78	105	0	8	1	98	1	110	7	40	36	44	84	39	64	26	117
OTU1316	0	0	0	8	8	22	0	0	2	0	0	5	0	110	0	43	51	0	23	2	0	0	0	14	0	0	0	0	0	16	0	0	0	37	0	0	28	0	0	0	0	2	0	0	0	39	0	0	0
OTU1317	1	0	0	3	3	3	0	0	7	0	0	0	0	0	21	0	0	0	0	0	1	16	0	2	0	0	0	0	7	0	0	0	0	92	0	81	0	0	0	0	42	0	0	0	16	0	0	13	0
OTU132	7	0	9	0	6	8	8	15	0	22	16	0	7	0	25	4	0	35	78	84	105	0	17	132	0	2	29	0	1	0	1	72	28	1	158	0	0	0	65	27	0	50	1	67	88	91	0	0	163
OTU1320	0	0	0	0	4	15	1	0	0	5	0	1	0	41	0	0	41	0	0	0	51	0	26	35	5	0	0	0	12	0	42	0	0	0	0	0	14	0	0	0	36	0	22	0	23	0	0	23	0
OTU1321	0	0	0	0	0	0	0	0	0	9	0	1	0	36	18	2	17	0	0	0	2	0	18	0	0	0	30	0	0	0	0	0	0	0	32	0	33	40	0	0	14	0	0	0	0	0	0	0	0
OTU1325	0	5	0	0	0	4	9	9	0	0	2	0	11	1	2	25	1	0	0	37	29	0	20	0	0	0	0	0	1	0	39	0	0	0	12	0	0	0	0	0	0	35	0	0	0	0	0	39	1
OTU1326	16	0	2	9	23	7	0	10	10	0	0	1	0	0	56	0	6	0	0	0	21	14	12	0	0	0	0	0	0	0	0	99	2	0	0	2	32	1	0	0	0	0	44	1	17	0	0	1	18
OTU13273	34	0	6	0	24	22	4	7	26	0	0	0	0	0	1	82	0	0	2	0	39	14	0	0	1	25	35	0	7	0	0	0	0	0	0	0	0	0	0	0	0	0	0	35	0	0	0	0	0
OTU1329	39	62	33	0	13	4	17	8	1	0	3	0	0	26	32	0	0	0	0	0	0	9	0	0	0	0	0	0	0	17	0	0	0	0	0	0	0	29	1	1	20	0	0	0	1	29	0	0	0
OTU133	29	29	27	23	18	37	20	11	21	17	10	6	0	75	26	188	0	54	65	52	0	1	0	71	86	96	85	32	6	48	92	95	0	54	0	70	36	42	1	39	121	48	78	69	35	43	8	206	65
OTU13311	14	7	2	23	16	5	4	25	0	8	0	0	2	22	1	17	2	0	1	0	0	0	0	47	0	12	27	46	0	32	0	0	0	41	0	0	0	0	1	0	31	23	0	1	8	59	86	28	0
OTU1332	4	0	1	10	0	0	0	0	0	0	6	0	0	2	0	56	0	0	35	0	0	65	17	34	0	0	0	0	0	37	0	0	0	0	31	250	0	0	0	8	0	0	0	0	0	15	0	32	0
OTU1334	0	0	0	0	0	4	0	0	0	0	0	0	0	0	0	0	0	0	0	81	0	0	0	18	0	0	0	0	0	0	0	0	0	0	0	0	0	1	1	44	0	0	0	26	0	0	23	0	14
OTU1336	0	0	0	0	0	14	0	0	3	13	0	0	0	0	0	0	27	0	0	0	48	0	0	0	40	0	0	43	16	0	0	45	0	0	0	0	0	0	0	0	18	41	0	0	0	0	0	1	0
OTU1338	0	0	0	0	15	0	1	0	0	0	0	1	0	4	0	0	29	0	0	0	0	17	0	0	0	0	0	16	0	0	0	0	0	34	0	41	0	1	0	5	3	13	0	0	9	21	44	0	0
OTU13383	6	0	36	1	15	0	7	0	8	1	0	8	0	1	2	2	0	0	40	3	36	0	0	3	0	35	13	2	20	78	2	1	0	19	3	0	3	3	0	1	61	83	0	0	36	29	35	1	36
OTU134	25	56	26	43	17	26	40	32	14	15	20	12	41	135	24	19	49	192	2	37	19	47	124	38	3	17	148	40	20	91	0	126	101	75	41	88	26	192	1	97	27	3	62	1	98	126	3	67	38
OTU1340	0	0	0	0	0	0	0	0	0	0	0	1	0	0	1	3	32	0	0	35	0	20	0	0	0	0	0	0	4	0	0	0	0	0	0	0	0	13	0	0	0	0	0	0	0	1	0	1	0
OTU1341	49	20	8	12	31	11	15	3	6	0	0	0	0	0	0	0	0	0	0	0	0	0	0	0	0	0	0	0	0	0	0	0	0	0	0	0	0	0	0	0	0	0	0	0	0	0	0	0	0
OTU1342	0	14	25	51	42	0	1	6	23	0	0	0	0	3	0	0	0	0	0	1	0	0	0	0	0	0	0	0	0	0	1	1	0	0	0	94	0	0	0	0	0	0	0	0	0	0	0	0	0
OTU1344	0	2	0	4	0	3	0	3	0	2	6	0	0	13	0	1	1	2	0	2	53	47	0	0	2	0	0	0	17	0	23	2	0	0	0	2	0	0	0	36	0	0	0	1	0	22	22	0	73
OTU1346	0	0	0	0	0	0	0	0	0	26	0	1	0	0	0	0	0	25	0	0	0	0	0	27	0	0	0	0	0	0	0	0	0	0	46	68	0	0	0	0	0	20	0	0	34	0	0	0	54
OTU13474	0	0	0	0	0	0	0	0	2	0	1	0	0	34	1	1	0	0	0	26	0	0	37	0	0	6	0	14	6	1	0	1	0	0	0	0	0	0	0	0	39	0	0	1	1	0	0	25	22
OTU1348	8	7	0	0	18	7	0	4	0	0	0	9	0	0	0	0	0	0	0	0	0	0	27	0	24	0	0	0	0	0	0	0	0	0	0	0	0	0	80	0	0	0	0	0	1	0	0	0	40
OTU1349	10	0	13	0	10	18	16	17	1	0	0	0	8	0	1	0	0	1	0	0	0	0	1	10	0	0	0	1	0	1	0	41	0	0	0	0	0	1	0	38	1	35	31	0	31	1	0	0	19
OTU135	173	183	166	73	162	121	88	178	114	3	32	1	11	0	42	1	33	0	10	24	21	41	20	0	0	3	1	38	0	30	21	1	10	0	100	1	38	15	0	56	2	1	37	0	38	0	0	52	0
OTU13500	0	0	1	7	5	0	0	0	2	7	0	1	19	0	98	13	0	1	0	53	0	0	35	2	17	3	2	0	11	17	0	21	36	27	0	39	56	0	7	38	36	0	0	0	0	3	0	55	47
OTU1352	1	5	0	1	37	0	15	4	0	10	0	0	0	45	0	0	0	3	0	0	0	0	1	0	42	0	0	1	0	0	0	41	64	1	0	0	0	0	0	0	0	0	0	16	0	0	0	0	0
OTU1353	0	0	0	0	0	12	0	0	8	8	0	0	0	0	0	0	5	0	0	37	0	1	38	0	0	27	31	0	6	1	0	114	0	0	29	11	0	0	23	0	0	0	0	0	0	0	0	0	0
OTU1354	0	0	1	0	0	3	0	1	0	18	0	0	0	0	0	1	0	0	1	43	28	2	44	25	24	0	0	28	7	1	0	2	2	1	0	0	58	46	0	51	0	0	0	0	45	0	0	49	0
OTU1356	25	55	49	12	34	93	47	25	40	6	0	5	0	20	37	9	35	0	0	9	10	0	0	0	0	0	0	0	12	18	26	1	0	1	104	45	2	1	46	1	59	0	0	57	0	103	24	136	52
OTU136	8	13	23	12	19	24	34	40	5	13	0	6	18	1	54	28	122	31	73	0	23	73	24	12	1	2	51	2	7	60	0	49	43	34	26	42	21	69	1	52	98	25	49	68	17	18	2	17	131
OTU1360	0	0	15	0	31	0	1	0	0	11	0	6	0	0	1	5	0	93	0	0	0	0	0	0	18	0	56	0	0	0	0	0	0	0	0	0	0	0	0	0	0	0	0	0	0	0	0	0	0
OTU1361	0	0	0	0	0	2	0	2	0	0	0	0	7	0	0	0	0	0	12	0	0	0	0	0	0	0	36	0	1	0	0	52	13	0	0	0	0	0	0	0	0	0	0	0	0	0	0	69	0
OTU1362	5	0	18	6	4	0	0	6	0	0	5	0	0	10	18	0	3	0	0	0	0	0	62	0	0	0	0	0	8	102	0	8	0	0	0	16	0	0	0	3	37	23	0	0	22	21	0	0	0
OTU1366	0	0	0	0	0	0	7	11	0	0	0	0	0	0	0	18	0	0	0	0	0	0	0	41	0	0	0	0	0	0	0	0	0	0	0	0	0	0	21	0	37	0	0	0	37	0	0	0	35
OTU1367	2	0	0	0	0	0	0	0	0	0	0	0	0	0	0	0	0	0	1	0	52	0	0	0	0	1	0	0	15	25	0	0	1	0	0	0	0	0	0	0	0	0	0	0	90	0	0	0	0
OTU1368	0	4	0	0	0	0	7	0	0	0	0	4	0	0	0	0	0	0	0	0	0	0	0	0	0	0	0	27	0	0	0	0	47	27	0	0	0	0	0	0	15	20	0	23	0	0	0	95	0
OTU137	17	8	14	11	19	22	5	3	10	7	8	0	14	32	56	13	90	115	71	49	23	0	0	28	0	30	0	230	15	17	42	6	0	0	44	36	45	155	0	37	8	73	42	51	1	0	42	0	21
OTU1372	21	6	23	5	56	5	0	38	50	8	0	0	0	0	0	0	0	0	0	34	0	0	0	0	0	0	0	59	9	0	0	0	0	0	0	0	0	0	0	0	0	0	0	0	0	0	0	0	0
OTU1373	2	5	25	39	3	5	0	15	47	0	0	0	10	83	63	4	2	1	43	28	10	44	57	0	6	34	44	3	35	3	1	5	3	4	53	95	41	17	35	48	0	14	35	25	0	0	0	37	28
OTU1375	8	0	1	0	0	3	20	0	9	0	0	1	0	0	0	0	43	1	36	0	34	1	0	0	0	2	91	0	18	28	79	35	57	0	1	25	0	0	1	1	0	0	0	0	12	1	56	32	0
OTU1376	0	0	0	0	26	16	16	7	0	10	0	0	0	1	0	9	0	0	1	1	0	0	3	37	1	8	0	0	0	0	1	23	0	0	0	0	20	0	0	0	1	0	0	0	14	0	0	0	0
OTU1377	0	0	0	0	0	8	0	0	0	0	0	12	1	0	0	0	0	0	0	0	24	0	8	0	0	2	0	36	0	0	0	0	0	0	0	0	43	0	68	0	0	14	2	19	0	65	0	0	0
OTU1378	0	0	0	0	0	18	0	0	0	0	0	0	0	0	1	4	0	0	0	0	0	0	0	0	0	2	1	0	0	41	2	0	5	44	0	0	1	0	0	0	0	0	25	4	4	0	0	0	0
OTU138	95	45	13	69	65	46	36	31	53	34	15	21	61	19	0	0	75	8	0	1	0	2	0	115	61	0	34	34	21	40	32	1	66	147	41	32	23	64	0	20	67	1	0	0	3	110	50	20	86
OTU1380	9	0	0	0	0	0	0	0	0	0	0	0	0	1	1	4	0	0	0	0	30	0	0	0	0	0	1	0	0	31	0	0	0	0	0	40	32	0	0	74	0	26	0	0	0	1	0	0	0
OTU1382	0	0	24	0	0	12	6	0	14	17	20	0	0	0	0	0	0	0	0	0	0	0	0	0	0	0	0	0	0	0	0	0	0	0	0	0	0	0	0	0	0	0	0	0	20	0	34	0	0
OTU1383	0	13	0	5	0	3	5	0	0	2	0	0	1	0	0	0	1	0	0	0	5	0	0	0	0	0	29	0	7	0	0	18	0	0	0	0	30	1	77	0	0	21	0	0	25	32	0	0	1
OTU13833	0	9	8	0	0	0	1	12	23	13	0	0	0	0	22	0	0	1	0	1	0	1	0	0	0	0	68	0	11	0	0	0	0	17	0	0	0	5	0	0	1	0	0	5	11	30	0	0	1
OTU13850	58	55	108	54	55	62	28	51	22	2	1	1	1	33	3	18	0	51	0	1	0	1	0	26	1	1	0	0	3	0	1	50	0	1	2	3	19	51	0	3	0	0	0	37	22	41	7	0	0
OTU13880	13	14	0	65	22	53	50	52	37	6	0	0	0	0	23	1	1	0	1	0	1	0	21	0	2	0	0	1	8	8	0	95	0	0	0	1	0	0	0	61	26	6	0	0	15	9	1	3	69
OTU13882	39	42	50	18	47	18	36	67	45	0	0	0	0	0	0	0	0	0	0	0	0	0	0	0	26	0	0	0	0	0	0	0	0	0	0	16	0	0	0	0	0	0	1	0	0	0	0	0	0
OTU1389	0	3	0	2	0	7	0	0	0	1	15	0	13	40	22	1	1	0	1	1	12	12	1	3	3	0	3	43	33	33	3	48	1	2	33	5	1	1	0	1	0	43	0	0	36	115	41	35	0
OTU139	77	79	73	60	48	57	54	13	33	53	1	6	47	39	70	146	3	39	94	143	45	38	49	143	23	34	20	30	50	22	124	118	76	86	48	199	11	59	20	143	68	25	65	65	18	46	105	93	89
OTU13901	17	16	12	0	4	24	15	9	0	0	0	11	10	0	0	0	0	9	19	77	0	0	0	0	10	10	0	0	0	0	3	1	0	1	0	0	104	0	11	0	0	0	13	11	41	0	0	0	0
OTU1391	22	8	0	0	0	8	0	0	5	0	1	0	0	0	1	0	18	0	0	2	0	33	1	0	2	12	2	0	0	2	0	0	0	1	1	0	1	2	38	0	34	0	0	23	24	0	0	0	0
OTU13937	0	2	4	0	4	0	0	0	0	0	1	0	0	0	0	0	2	1	47	2	20	0	0	0	0	0	0	1	1	2	1	0	0	1	0	0	0	0	0	0	0	0	1	0	0	1	0	0	0
OTU1394	0	0	0	9	0	7	0	0	0	0	0	0	0	0	0	30	0	26	0	0	26	9	0	0	23	0	0	0	8	35	0	0	0	0	3	0	0	24	0	0	0	14	0	0	0	0	35	0	0
OTU13965	0	0	0	20	9	1	0	9	7	0	6	1	0	2	38	0	12	1	8	30	10	0	0	0	0	1	0	0	16	0	0	74	1	1	28	0	0	0	0	35	22	0	7	13	19	0	0	0	18
OTU14	1741	1459	1427	1609	1486	1381	1597	1596	1535	201	226	173	183	235	308	466	381	481	246	446	383	267	267	342	467	178	383	171	229	262	325	317	500	625	853	435	312	482	394	482	510	180	244	512	328	289	403	379	285
OTU140	77	85	58	52	116	68	51	59	135	11	3	17	0	32	80	78	59	25	75	97	133	90	71	58	101	61	164	154	49	150	68	18	138	146	180	73	165	116	54	202	12	117	154	84	71	15	32	146	74
OTU1402	0	0	0	5	21	4	0	0	0	0	0	0	0	0	0	1	0	0	0	0	0	0	0	0	0	0	0	1	29	0	0	0	0	0	0	0	0	63	0	0	0	0	36	0	0	76	0	0	0
OTU1403	0	0	0	0	0	1	0	0	0	6	0	0	1	0	1	0	0	0	0	0	0	0	0	36	35	32	0	0	0	32	1	20	0	1	0	0	32	0	0	3	0	55	21	20	4	0	0	0	0
OTU1404	0	0	0	5	0	0	0	0	0	9	1	0	0	1	0	0	1	0	1	1	0	76	0	0	16	0	80	0	0	17	0	0	0	0	0	0	0	0	30	69	49	1	0	20	34	0	0	0	25
OTU14059	0	15	0	5	38	16	0	28	0	0	4	0	0	1	46	0	35	0	0	16	0	23	0	18	0	0	0	41	0	0	0	52	1	0	0	37	29	0	0	1	0	10	47	68	0	5	0	0	0
OTU1406	7	0	0	0	0	0	4	0	7	0	0	0	0	2	0	19	0	0	30	0	0	0	13	13	0	0	20	0	0	19	0	0	0	38	0	0	0	0	0	0	1	0	0	0	0	0	0	0	0
OTU14075	6	29	0	16	0	17	0	15	14	0	0	0	0	1	0	0	1	21	1	50	0	0	1	22	0	18	41	0	0	1	25	0	0	50	0	25	0	0	29	0	0	33	2	0	0	15	0	16	0
OTU1409	9	8	0	7	2	0	0	0	5	0	0	0	13	0	0	0	0	0	0	0	0	23	23	17	60	0	0	47	4	0	0	0	0	0	8	0	31	0	0	0	4	0	0	0	0	24	77	25	0
OTU141	81	76	63	115	94	96	140	129	83	64	34	26	43	17	22	39	197	43	112	265	9	58	102	77	171	59	111	54	192	72	318	160	111	81	404	149	128	121	155	113	81	95	146	255	163	130	356	154	44
OTU1410	0	15	12	0	0	4	5	0	0	5	0	0	0	0	28	0	22	0	1	0	1	26	0	27	55	1	1	44	3	0	85	6	2	1	3	52	1	1	32	17	0	0	0	0	1	0	0	0	0
OTU1411	0	1	7	0	2	4	26	2	18	0	0	0	0	0	0	0	0	27	0	0	0	0	0	0	0	0	0	0	0	0	0	0	0	0	0	34	0	0	0	0	0	0	0	14	20	0	0	0	0
OTU1414	0	0	0	0	0	0	0	0	0	0	7	0	30	0	0	0	0	0	1	0	0	0	0	0	0	3	0	0	6	15	0	56	0	0	0	0	22	30	0	0	0	0	0	29	0	0	44	0	0
OTU1415	1	12	0	0	0	14	12	0	0	0	0	0	0	0	0	0	0	64	0	0	0	0	0	0	0	1	0	0	0	0	0	58	0	0	0	0	0	76	0	0	0	1	0	0	14	0	0	0	0
OTU14152	40	0	0	0	1	8	1	16	0	0	0	4	0	21	0	0	0	0	0	1	1	0	0	0	0	16	0	0	0	3	0	0	3	0	0	18	35	0	1	4	0	0	0	0	31	0	41	0	0
OTU1418	29	13	38	16	0	21	0	16	29	1	0	0	1	35	0	33	0	1	28	17	0	40	0	0	1	0	0	1	9	15	30	1	0	0	0	0	0	0	56	0	0	20	2	1	0	1	0	30	2
OTU142	54	93	33	90	46	78	29	44	20	14	25	2	47	7	120	109	149	116	8	164	168	63	32	41	178	6	164	76	53	109	211	18	87	164	298	56	76	174	34	70	70	36	85	184	122	109	98	80	119
OTU1420	10	20	0	2	0	14	0	18	0	5	0	0	0	21	41	0	0	0	71	1	75	0	0	0	0	0	0	76	0	0	0	0	0	0	0	0	0	0	0	0	1	0	0	0	9	32	0	0	13
OTU1421	0	1	0	0	0	4	19	0	1	0	1	0	0	1	2	0	32	0	0	1	0	0	33	0	0	0	2	41	0	0	0	2	2	0	0	123	3	0	1	0	1	0	1	0	49	0	137	0	0
OTU1427	0	3	0	0	10	0	0	2	1	0	0	0	0	0	14	0	1	0	0	1	0	0	24	0	2	0	0	0	0	26	0	91	1	89	0	1	0	0	83	0	2	0	0	0	0	0	0	0	1
OTU1428	0	0	0	0	6	0	0	6	0	21	0	0	0	38	0	0	0	1	0	0	1	0	0	0	0	0	0	0	0	23	0	0	0	1	0	1	412	0	0	0	1	0	0	45	0	0	0	0	0
OTU14299	0	1	0	1	3	0	1	3	0	3	0	5	29	11	1	0	35	3	4	26	0	3	1	0	2	12	1	1	2	15	0	24	5	3	1	1	1	1	2	1	0	0	79	28	6	46	0	35	2
OTU143	0	14	52	2	21	5	11	47	42	32	7	1	6	131	65	16	85	52	66	119	63	18	2	27	34	2	1	186	0	38	0	70	97	0	2	9	69	14	1	120	89	20	1	28	90	2	132	2	96
OTU1432	2	2	11	9	18	3	0	0	33	0	0	0	0	0	0	0	0	0	0	0	0	0	0	0	0	0	0	0	0	0	0	0	0	0	0	0	0	0	0	0	0	0	0	0	20	0	0	0	0
OTU14322	1	0	0	1	24	2	23	0	26	0	7	0	0	0	57	0	1	1	0	51	0	0	0	1	0	70	4	0	13	2	32	0	1	1	2	0	0	2	0	0	0	0	24	0	0	0	0	0	0
OTU1438	2	0	12	0	5	8	27	18	34	0	0	0	0	0	1	0	0	0	0	0	0	0	0	0	0	0	0	0	0	0	0	0	0	1	0	0	0	0	0	0	0	0	0	0	0	0	0	0	0
OTU1439	0	8	24	26	27	17	21	22	9	0	0	0	0	0	0	1	0	0	0	0	0	0	0	0	0	0	0	0	0	0	0	0	0	0	0	0	0	0	0	0	0	0	0	0	0	0	0	0	0
OTU14399	6	14	2	11	8	3	4	17	9	2	4	1	9	6	4	53	7	2	5	9	1	1	3	0	0	0	2	1	38	2	57	1	0	41	0	0	0	4	5	5	3	60	4	1	9	0	0	2	2
OTU144	2	21	11	16	3	21	20	24	16	12	0	5	6	89	27	27	5	1	0	39	23	25	0	23	0	14	63	85	9	6	0	19	2	70	52	63	0	124	60	28	0	7	0	0	31	5	46	0	54
OTU1440	10	5	11	20	18	16	73	53	16	0	0	0	0	3	0	0	0	0	0	41	0	17	0	33	0	0	0	41	32	15	41	0	0	0	40	0	50	92	0	0	1	0	0	60	172	1	14	26	1
OTU1441	0	0	0	0	0	1	2	0	5	6	0	6	1	38	1	2	1	2	0	0	0	30	28	0	3	8	1	0	0	1	2	57	1	32	90	1	0	1	0	0	0	0	0	0	64	0	0	0	23
OTU1442	8	0	0	0	3	0	6	12	12	0	5	0	0	0	14	0	35	29	0	61	11	28	0	28	27	0	0	31	27	0	0	0	1	24	0	0	0	0	7	1	32	20	13	26	23	44	24	0	0
OTU145	62	48	43	54	80	68	70	83	79	0	0	4	0	0	1	0	0	0	0	0	0	0	0	0	0	0	0	0	0	0	1	8	1	1	0	1	0	0	0	0	2	0	0	0	0	0	0	0	0
OTU1450	0	14	9	1	0	0	6	4	16	0	2	5	0	0	0	4	0	0	0	0	0	1	1	1	2	1	0	1	0	0	0	0	0	0	0	0	0	1	0	0	0	0	0	0	0	0	0	0	0
OTU1451	1	1	0	0	1	0	9	7	4	0	5	0	13	0	0	0	2	26	2	0	20	0	0	19	0	9	33	0	13	0	0	0	0	0	14	0	0	0	0	0	27	4	0	0	0	0	0	0	0
OTU1452	0	0	12	10	0	0	0	0	0	0	0	0	0	30	0	0	0	1	14	0	65	0	1	0	0	0	0	1	20	0	0	0	0	0	0	0	0	0	43	0	1	0	11	33	29	45	0	10	0
OTU1453	16	3	19	3	1	1	19	5	1	3	14	19	1	49	7	6	5	84	56	26	43	28	43	97	34	2	14	43	14	103	88	22	41	31	1	44	0	0	0	129	7	15	82	9	29	3	14	34	14
OTU14534	17	1	9	0	8	3	8	0	1	0	0	0	6	3	1	18	0	1	1	29	1	0	7	0	25	1	1	24	0	36	34	0	0	0	1	1	8	0	0	0	35	0	49	1	8	26	0	24	0
OTU1454	9	0	27	0	0	1	13	0	0	0	0	11	0	1	1	0	12	0	0	82	0	31	73	0	71	2	0	0	17	4	34	38	26	60	55	0	70	25	25	33	0	0	42	0	0	0	0	0	0
OTU14550	15	5	31	13	21	17	11	11	19	1	4	2	7	0	32	0	0	0	31	53	8	0	10	0	6	0	0	0	4	0	0	0	0	0	25	1	11	29	0	0	1	0	0	16	15	0	0	1	37
OTU146	24	69	13	54	34	69	30	45	73	0	0	0	36	1	2	0	1	0	0	0	61	27	1	14	13	18	0	0	0	0	0	0	0	0	28	0	23	0	44	0	47	80	9	1	26	30	24	44	0
OTU1460	1	7	1	11	5	5	7	0	28	0	0	3	0	0	68	1	0	1	0	43	0	0	30	3	1	25	1	2	6	2	1	1	0	1	1	1	1	0	0	0	0	0	1	1	27	0	1	0	0
OTU1464	0	0	0	19	1	4	0	0	0	0	0	0	28	1	0	0	0	31	0	51	0	0	0	0	0	0	0	0	0	0	0	0	0	0	0	0	0	0	0	59	0	1	0	24	0	0	0	0	25
OTU1465	0	0	0	0	0	13	10	0	0	0	0	0	29	0	0	0	3	0	33	0	0	0	23	0	0	18	0	0	0	0	0	0	0	36	0	33	0	0	0	0	0	0	0	0	12	0	59	0	66
OTU14664	18	17	0	0	19	27	0	0	7	51	0	0	0	0	29	46	45	1	63	0	1	0	0	0	1	0	0	45	0	0	0	0	0	0	0	4	0	0	0	120	0	0	0	33	36	0	1	0	0
OTU1469	1	15	5	0	0	7	0	0	1	0	0	0	13	21	0	0	0	21	0	0	0	0	0	22	0	0	0	1	1	28	65	1	0	0	0	0	1	0	0	0	0	0	70	17	0	22	0	0	0
OTU147	48	56	30	40	129	64	38	48	53	26	0	11	1	16	0	0	1	8	48	0	28	0	24	63	0	0	54	0	20	4	58	51	21	1	60	23	0	86	0	1	81	63	47	13	24	0	39	0	0
OTU1473	0	7	0	0	4	1	1	1	0	9	19	0	15	22	29	0	0	0	0	25	0	1	0	32	0	0	0	0	0	0	0	33	13	0	0	0	0	0	0	0	0	19	0	0	1	1	0	0	0
OTU14740	0	1	14	7	12	22	11	5	11	1	13	0	0	0	0	1	38	50	1	0	18	0	25	0	10	13	0	0	11	1	1	0	0	0	0	0	0	2	0	0	2	18	84	0	57	19	44	0	1
OTU1475	17	0	0	0	0	0	0	0	0	0	1	1	17	0	0	0	0	0	0	0	0	0	0	0	0	0	0	0	0	0	0	0	0	87	0	0	0	0	0	1	86	13	0	0	0	0	0	0	0
OTU1477	0	1	1	0	0	1	1	0	8	10	0	0	2	2	0	2	0	0	21	1	0	1	0	0	1	0	0	1	4	0	29	0	73	0	0	1	0	0	1	0	0	0	2	0	0	2	3	0	2
OTU14772	8	18	0	0	4	0	17	0	0	0	0	0	0	0	0	0	0	0	0	0	0	0	0	0	0	0	0	0	0	0	0	0	0	0	0	0	0	0	0	57	0	15	1	27	37	0	0	0	0
OTU1479	1	18	0	15	0	2	9	8	0	0	0	18	0	0	20	0	1	16	48	3	20	0	0	33	0	1	1	0	1	0	0	0	0	0	79	0	1	0	0	27	34	1	0	19	0	1	0	0	30
OTU148	32	9	21	15	32	10	12	29	20	21	13	3	15	3	0	0	56	0	32	42	14	38	48	42	110	1	53	101	36	66	0	24	1	60	18	70	22	1	1	15	93	0	29	0	49	95	22	57	47
OTU1480	21	0	11	10	13	1	9	41	40	0	0	0	0	0	0	0	0	0	0	0	51	0	0	0	0	21	0	0	3	30	0	0	0	1	0	23	58	17	0	0	0	0	0	0	0	0	16	0	1
OTU1485	0	21	0	0	11	2	0	14	0	0	0	0	4	35	0	23	0	1	0	0	18	0	0	0	0	0	13	58	21	0	0	0	0	0	0	15	0	47	19	1	0	24	0	0	7	0	0	0	0
OTU1486	0	4	0	5	0	40	0	0	11	0	0	8	2	0	0	1	0	73	0	0	0	1	0	0	0	0	0	0	0	0	0	0	0	0	0	40	0	0	0	0	0	0	24	0	0	0	33	0	0
OTU14875	0	0	0	14	24	10	16	13	0	0	0	0	1	0	0	0	2	0	0	0	0	0	0	0	0	0	0	43	1	0	0	0	23	0	0	0	0	0	0	0	0	0	9	0	0	0	3	24	2
OTU14893	0	4	0	0	0	0	0	0	0	0	0	5	0	0	0	0	15	15	0	0	33	0	0	9	0	6	0	0	0	0	0	50	0	0	39	0	0	0	0	0	1	0	0	0	0	29	0	14	0
OTU149	69	35	36	17	37	23	27	36	46	10	2	0	22	32	28	31	37	38	62	55	51	72	68	33	46	6	63	2	56	0	46	70	94	70	59	128	0	0	17	117	1	2	1	40	18	0	41	86	62
OTU14955	0	0	0	0	0	0	0	1	0	0	0	1	0	0	1	0	50	0	0	25	0	0	20	0	0	0	0	0	0	18	0	0	0	0	0	0	0	48	0	0	0	0	0	31	1	0	24	0	0
OTU15	215	319	316	390	322	309	223	422	304	260	264	202	283	775	816	1325	938	1288	1299	895	855	596	417	785	846	379	1223	855	460	507	1159	1507	1168	984	1038	1445	946	1276	835	1099	959	848	779	947	677	1406	985	688	1032
OTU150	24	5	7	3	31	25	40	33	10	9	6	4	25	16	35	48	42	111	54	93	71	30	19	135	52	39	24	97	35	46	120	88	0	31	117	85	81	74	0	114	59	61	29	83	36	65	48	88	11
OTU1508	1	11	42	19	29	28	0	24	0	0	0	1	0	0	0	0	0	0	0	0	0	0	0	0	0	0	0	0	0	0	0	0	0	0	0	27	0	0	0	0	0	0	0	0	0	0	0	0	0
OTU1509	18	0	24	11	0	2	0	3	5	3	0	0	0	1	0	9	0	0	0	0	0	0	12	0	0	0	0	0	0	0	0	0	0	0	0	0	0	0	0	0	0	0	0	0	0	0	0	0	0
OTU151	30	25	29	36	44	39	46	29	14	12	12	14	19	11	15	45	42	45	75	5	6	9	45	3	3	4	8	3	3	5	6	6	31	55	5	90	5	118	2	5	131	23	31	72	21	78	0	0	0
OTU1512	0	0	5	9	0	5	0	0	0	0	0	0	0	0	0	0	0	81	0	0	0	0	0	0	0	0	0	1	43	0	1	0	0	0	0	0	2	0	0	1	0	0	0	0	0	0	43	1	35
OTU15128	10	1	1	0	8	0	4	3	3	0	0	5	17	23	0	19	0	0	65	80	49	13	0	0	0	19	0	21	8	4	37	0	0	0	0	78	40	1	52	0	90	0	0	62	0	19	4	0	22
OTU1513	1	12	21	7	9	28	10	21	53	7	16	14	0	45	100	31	1	3	53	4	37	16	4	43	78	1	1	0	9	85	31	1	30	2	4	49	2	0	25	62	0	11	36	37	29	0	25	1	0
OTU1516	0	0	0	0	4	2	0	6	0	0	0	0	0	0	0	0	15	0	0	0	0	40	0	0	19	0	0	0	0	0	0	0	0	0	0	0	0	0	0	1	57	0	0	0	0	0	0	26	46
OTU152	27	72	54	62	98	83	37	65	48	0	0	0	0	0	1	0	0	1	0	0	0	0	0	0	0	1	0	0	0	19	0	1	42	1	0	53	0	0	0	0	0	0	0	0	0	0	0	0	0
OTU1520	0	3	0	0	0	0	0	0	0	0	11	0	0	27	0	0	0	75	10	1	0	0	21	0	0	1	38	0	36	0	0	0	0	31	0	0	0	2	0	0	0	0	0	0	0	0	0	0	0
OTU1523	49	21	5	14	15	9	26	20	0	2	0	3	8	0	68	0	0	0	47	31	2	0	1	1	19	0	1	0	38	6	0	1	87	37	39	6	2	22	0	1	0	31	1	0	3	41	65	0	0
OTU15286	96	44	73	99	97	78	60	79	123	0	0	1	0	0	1	0	2	0	0	0	0	34	0	0	0	0	0	0	0	2	2	0	0	0	1	2	0	0	0	0	0	1	0	0	1	0	0	0	0
OTU15288	21	47	47	4	30	0	37	1	8	0	0	4	12	0	13	0	0	1	0	0	0	0	20	4	1	16	0	0	0	77	2	0	5	41	44	1	19	2	2	61	0	18	0	49	0	1	14	1	26
OTU15293	0	0	19	1	32	0	7	0	0	0	0	0	0	0	0	1	0	38	0	0	1	0	0	0	0	0	0	0	0	0	0	71	0	0	0	0	0	0	21	0	0	0	26	0	26	1	0	0	64
OTU153	85	41	57	54	95	53	37	109	126	0	0	1	1	16	0	0	9	1	1	0	0	0	0	1	1	0	0	0	0	0	0	0	0	0	1	0	1	0	0	0	0	0	0	0	0	33	0	0	0
OTU15301	0	1	0	0	0	11	0	14	0	0	0	10	1	0	28	0	0	0	0	45	0	0	89	25	0	0	3	60	16	33	0	60	0	0	42	0	52	62	0	21	32	58	0	0	0	0	41	0	76
OTU15314	3	23	3	23	14	8	0	21	3	0	0	0	0	0	3	7	52	0	0	0	0	0	14	0	0	0	0	3	0	0	0	0	0	1	0	0	0	0	36	1	0	0	0	0	3	2	0	0	0
OTU1532	0	0	0	0	0	0	0	1	6	0	0	0	0	0	0	0	0	1	0	0	0	1	0	0	1	0	3	0	2	0	2	0	0	0	27	1	36	0	0	0	0	15	0	0	0	0	0	1	0
OTU15335	30	20	14	0	6	34	3	48	0	0	0	0	5	0	1	0	0	0	0	0	0	0	0	0	0	0	0	0	0	0	0	1	0	0	0	0	0	16	0	0	0	0	0	0	2	0	0	0	0
OTU1536	0	0	0	1	0	0	7	0	8	0	1	0	0	1	0	0	0	0	0	0	12	0	0	0	62	0	0	0	6	37	0	6	1	45	10	0	0	32	1	0	0	0	42	0	48	0	48	0	0
OTU15368	0	7	3	0	0	3	0	0	0	0	0	0	11	0	0	0	0	27	17	0	0	0	0	27	0	0	64	0	0	0	0	0	0	0	0	0	35	0	0	0	0	18	0	0	0	0	0	0	0
OTU154	57	38	28	19	59	12	45	38	60	16	16	8	7	40	0	52	48	1	0	30	12	23	98	52	65	0	65	185	27	9	0	30	78	32	26	37	20	0	27	14	138	83	22	109	96	0	2	0	66
OTU15418	1	5	3	0	0	8	3	0	0	1	1	0	0	7	21	0	1	0	1	32	1	0	4	0	0	44	0	0	3	1	3	0	1	2	0	10	0	1	16	1	0	0	0	44	0	5	1	0	0
OTU1542	25	7	14	0	14	6	2	21	10	0	2	1	5	51	1	0	0	0	0	0	36	0	11	1	0	0	10	24	5	18	0	0	0	0	0	0	52	2	51	22	76	49	0	1	13	29	28	26	31
OTU1543	0	10	0	20	0	9	6	0	18	7	3	0	0	0	24	0	0	0	117	0	0	0	0	0	1	1	42	0	0	0	0	0	0	0	0	17	36	22	13	0	20	0	1	1	13	0	1	0	0
OTU15434	4	3	2	19	16	8	14	24	7	0	0	0	12	40	0	2	0	23	49	0	0	49	1	34	3	15	2	0	10	24	18	2	0	1	1	0	2	1	1	48	1	2	33	1	71	63	0	0	1
OTU15435	0	0	0	1	0	0	0	0	0	0	3	0	0	2	22	0	0	79	18	3	0	0	0	0	0	0	0	29	0	15	8	16	27	0	0	9	0	0	0	10	0	11	0	0	0	26	0	10	15
OTU155	6	4	21	19	11	7	37	59	43	0	9	0	21	73	26	73	10	1	67	17	36	42	17	0	9	0	60	57	3	24	56	1	1	43	104	1	27	43	2	1	83	1	25	31	35	55	14	50	22
OTU15578	0	0	0	0	0	0	0	0	1	0	0	1	0	0	23	0	2	19	0	0	0	18	0	0	42	0	0	1	13	1	5	0	0	0	0	0	36	52	60	0	23	20	0	2	17	2	17	33	27
OTU1559	15	0	0	0	2	8	0	10	19	1	1	1	1	64	19	2	25	0	23	0	16	1	58	0	0	0	0	61	16	14	32	0	82	28	0	4	26	20	1	0	46	0	29	0	8	0	18	0	0
OTU156	0	7	2	0	22	15	7	22	8	0	30	1	15	88	2	89	0	45	0	64	0	43	1	116	95	0	130	19	38	0	87	36	111	0	32	0	15	61	64	31	65	47	39	70	0	40	121	0	81
OTU1563	0	0	0	9	5	13	0	4	0	0	0	0	0	1	0	5	2	61	0	30	0	0	21	24	0	0	36	49	0	20	25	0	0	61	0	2	34	31	45	0	0	1	0	51	44	2	15	25	0
OTU1564	0	0	0	0	0	0	0	0	0	0	0	0	0	0	0	0	10	33	0	0	0	16	0	11	0	0	10	60	26	24	14	55	0	51	47	8	0	0	10	1	0	0	22	0	0	9	0	34	20
OTU1566	15	0	0	0	4	19	0	27	2	6	0	0	4	0	32	55	0	0	0	18	19	0	30	40	0	15	0	0	46	0	8	32	0	0	1	0	0	1	22	1	40	0	45	6	6	0	0	0	0
OTU157	19	18	9	2	1	18	16	46	40	16	11	4	14	14	80	0	9	0	0	0	0	1	25	33	94	41	20	15	55	28	49	64	0	2	109	8	71	31	44	4	30	23	0	0	78	0	0	189	0
OTU1571	23	5	0	6	17	0	5	6	1	0	0	0	0	0	0	21	2	29	1	0	0	0	0	0	0	1	0	0	11	0	0	0	0	0	0	0	0	0	0	0	0	0	38	0	1	0	0	0	0
OTU1572	0	0	0	1	0	0	0	0	0	2	4	0	0	0	10	13	47	0	0	20	0	32	0	0	9	47	0	18	7	0	0	0	79	0	0	23	32	0	1	0	0	24	0	56	0	1	0	0	0
OTU1573	0	0	6	7	12	13	0	16	7	0	0	0	0	0	31	25	1	30	1	0	9	0	0	25	0	0	0	0	0	1	52	0	1	0	1	0	0	57	16	1	31	1	18	22	6	0	42	0	0
OTU1574	36	42	60	27	19	42	52	24	38	10	0	20	0	76	24	0	114	108	11	44	162	30	0	0	1	14	82	15	35	47	0	80	150	52	6	21	96	158	69	44	1	38	18	8	106	114	0	1	76
OTU158	37	55	37	42	117	66	47	32	44	26	7	6	13	26	94	19	52	36	17	14	89	64	97	2	43	59	66	105	38	41	29	42	61	78	59	28	33	120	58	53	150	43	91	19	42	89	63	60	76
OTU1580	0	0	0	0	0	43	0	0	3	0	0	2	0	0	0	0	0	0	44	0	0	21	0	23	0	0	1	0	7	1	4	0	0	40	0	48	23	1	0	0	0	0	1	5	0	0	0	0	0
OTU15800	5	5	0	0	1	4	0	16	0	0	0	2	0	0	0	0	1	0	0	0	0	21	1	0	0	39	54	0	1	1	24	55	0	59	0	0	1	0	0	0	37	55	0	0	0	15	0	0	0
OTU1583	9	0	0	6	16	4	12	29	34	0	0	0	0	40	0	0	1	40	0	0	0	32	0	1	0	0	1	2	2	0	2	49	0	0	1	0	66	0	0	1	0	24	24	0	1	0	0	0	22
OTU1584	0	11	1	15	0	0	0	0	9	3	0	0	0	0	0	0	0	3	0	15	0	0	0	86	45	1	1	0	55	18	1	2	14	1	0	0	0	0	0	24	3	0	0	10	24	0	0	33	26
OTU159	29	18	12	0	11	29	22	19	0	0	0	16	53	1	85	0	28	23	122	52	99	51	0	67	85	46	103	22	36	16	79	1	121	0	163	75	90	84	98	78	16	0	127	27	39	0	117	0	64
OTU1592	0	0	14	0	0	0	0	0	0	0	0	0	17	0	0	0	0	0	0	0	0	0	0	0	1	0	0	0	0	22	0	0	0	0	0	0	0	0	0	47	0	29	0	0	73	0	0	0	71
OTU1593	18	12	4	8	13	12	28	33	30	0	0	0	0	0	0	0	0	0	74	0	69	2	0	22	0	0	0	28	1	18	1	0	1	0	0	43	0	8	0	1	2	1	43	0	0	0	0	0	1
OTU15951	8	0	0	0	13	0	1	0	6	0	0	2	0	0	0	46	24	29	21	0	0	18	1	20	0	0	14	0	0	13	0	2	28	1	35	0	26	18	0	0	2	10	42	0	14	19	20	48	20
OTU1597	8	0	23	0	14	0	1	0	7	10	0	0	18	0	0	47	3	0	0	0	37	22	0	0	28	0	0	24	0	57	2	59	0	24	0	33	28	4	0	0	0	0	0	0	0	94	0	78	0
OTU1598	9	0	1	6	0	0	0	0	0	0	0	2	0	0	1	1	0	0	0	0	24	0	0	0	0	0	0	0	0	0	0	0	0	36	0	0	1	33	1	32	0	26	1	0	0	0	1	0	0
OTU16	1192	1211	1457	1575	1416	1270	1321	1481	1310	20	31	38	15	109	102	196	143	123	62	255	185	207	184	170	94	82	52	147	103	278	268	198	45	104	101	380	102	302	182	161	190	34	152	121	186	108	85	159	116
OTU160	12	22	21	33	12	2	13	0	7	24	0	27	1	21	26	0	117	1	1	45	68	36	49	99	0	8	81	56	28	37	93	63	0	56	1	70	27	0	61	2	31	32	76	0	84	33	0	16	33
OTU1602	9	0	41	0	0	0	6	0	9	0	0	0	0	0	1	0	0	1	0	0	1	1	1	0	17	0	0	0	0	23	0	0	7	0	0	0	1	22	0	37	1	0	0	63	0	0	2	0	0
OTU1604	9	21	12	6	0	1	0	13	8	0	10	0	0	0	26	41	0	1	0	0	0	0	0	0	0	0	1	0	0	0	0	0	26	37	0	1	0	0	30	0	1	37	0	0	59	0	1	14	1
OTU1605	0	19	13	6	0	0	0	0	0	0	0	10	4	1	2	1	41	7	31	0	0	47	0	1	0	1	0	47	1	1	1	0	0	81	0	3	0	57	0	2	2	0	0	1	24	0	0	0	2
OTU1609	0	0	0	0	0	0	0	0	9	0	0	0	0	0	0	0	0	0	0	1	0	17	11	17	0	0	0	0	0	0	0	0	1	0	0	0	1	0	0	0	0	0	27	76	1	1	0	0	0
OTU161	49	11	19	9	34	4	30	29	19	17	0	0	3	91	2	34	4	2	98	22	34	98	5	49	3	14	3	38	9	104	71	4	4	70	3	4	3	70	0	54	21	1	1	6	122	2	34	0	76
OTU1611	0	0	0	0	1	0	0	0	0	0	0	0	0	1	0	26	1	28	0	1	31	34	0	4	0	0	0	0	1	0	0	0	0	0	0	0	13	1	168	0	0	0	0	0	13	0	0	0	31
OTU1614	14	0	21	9	18	42	0	30	52	0	0	0	0	0	0	0	0	0	0	0	0	1	0	0	0	0	0	34	0	0	0	0	0	0	0	0	0	0	0	0	0	0	0	0	0	0	16	0	0
OTU1616	1	4	2	2	66	6	34	0	0	0	0	0	0	33	0	0	0	73	82	0	0	31	0	0	32	2	0	1	0	0	1	0	0	0	95	259	0	0	0	1	0	0	0	0	1	18	55	0	0
OTU16168	27	12	3	5	17	0	0	22	0	0	0	0	0	0	0	0	0	0	0	0	0	0	0	0	0	0	0	0	0	0	0	0	0	0	37	0	0	0	0	1	0	0	0	0	0	0	0	6	47
OTU16177	0	0	0	0	0	0	0	0	0	0	0	1	0	1	0	0	34	0	1	68	0	0	33	0	1	0	2	0	11	1	0	0	0	1	0	21	0	0	1	0	0	17	0	0	5	0	0	0	88
OTU162	15	73	67	9	5	34	10	41	0	16	14	16	6	2	0	0	71	0	0	114	0	0	0	1	24	2	56	0	3	54	80	69	70	118	0	2	33	1	19	0	0	1	0	0	26	62	33	0	35
OTU1625	0	0	0	0	0	2	0	0	10	0	0	0	0	0	9	17	0	0	0	0	0	1	0	0	1	1	0	0	16	15	53	1	0	0	0	0	1	0	0	0	0	0	0	15	1	23	1	1	0
OTU163	60	1	66	33	17	51	18	30	21	32	0	0	0	0	51	12	19	0	0	0	48	21	0	0	29	21	55	47	0	0	0	56	1	0	0	2	0	0	0	1	91	1	25	0	0	0	21	0	0
OTU16339	338	344	370	278	300	240	201	420	269	17	43	35	104	21	58	121	252	152	67	31	12	55	94	103	3	8	34	95	55	56	112	95	128	86	45	58	34	67	133	31	11	50	128	141	77	429	1015	24	8
OTU1634	17	3	0	8	0	3	0	0	0	8	0	11	0	13	7	0	0	0	0	54	0	0	0	0	0	23	37	34	35	0	0	0	27	1	0	0	0	0	0	1	0	0	0	0	0	0	0	0	0
OTU1636	0	29	8	23	0	22	5	0	29	0	0	0	0	0	0	0	0	0	0	0	0	0	0	0	0	0	0	0	0	0	0	0	0	0	0	0	0	0	0	0	0	0	0	0	0	0	0	0	0
OTU164	78	68	22	44	58	93	67	78	100	0	1	0	0	0	1	1	0	2	0	1	0	0	0	0	2	6	0	0	10	1	0	1	1	0	0	22	1	2	0	0	24	0	0	0	31	0	0	3	0
OTU1644	19	0	1	4	12	9	0	0	1	0	0	0	0	1	1	1	19	1	0	3	0	0	0	1	0	0	0	0	1	0	0	1	0	30	0	0	0	0	0	0	25	0	0	0	0	0	0	0	74
OTU1649	22	8	0	15	0	11	0	6	26	0	1	0	0	1	0	0	0	0	0	1	0	30	0	1	0	4	0	0	3	1	17	41	0	0	0	12	0	0	20	0	18	14	0	1	31	0	22	0	0
OTU165	111	134	57	104	106	46	128	79	26	19	12	8	10	74	69	72	12	44	32	29	73	5	32	1	34	3	158	28	65	126	48	139	97	150	38	71	73	76	34	35	1	0	24	1	50	72	19	49	1
OTU16544	0	2	0	0	0	0	0	0	0	0	0	0	0	0	0	0	0	0	0	0	0	0	0	0	0	0	0	0	5	0	0	1	0	0	3	0	806	0	0	0	0	0	0	0	0	0	0	0	0
OTU1655	14	33	27	18	17	0	37	4	18	0	0	0	0	0	0	0	25	0	0	0	0	13	0	47	0	0	0	0	2	15	0	0	0	0	0	77	0	39	20	1	0	28	0	0	10	0	0	0	13
OTU1657	35	1	27	1	1	1	0	0	19	0	17	1	3	1	33	2	0	10	1	0	34	41	1	45	1	1	0	1	83	26	107	0	52	67	19	2	57	0	0	1	26	29	33	38	20	0	38	39	0
OTU1659	0	0	0	0	0	0	0	0	0	0	0	0	0	0	25	1	5	0	0	35	0	21	0	13	0	0	0	0	4	1	1	1	0	0	31	23	0	0	0	60	0	39	23	0	11	20	0	0	0
OTU166	20	39	5	2	0	0	5	39	46	5	1	4	0	4	9	71	5	35	2	65	88	5	16	1	4	2	185	31	4	62	3	2	3	53	4	4	27	2	20	110	136	64	58	0	15	0	53	58	1
OTU1660	0	0	1	0	1	4	2	1	0	0	0	10	0	1	0	2	0	50	32	0	1	18	0	0	86	2	12	31	0	0	1	1	120	1	1	45	2	0	0	0	0	2	0	0	0	0	0	0	0
OTU167	32	63	77	55	30	71	62	81	117	10	9	7	12	13	4	66	22	62	11	92	0	4	7	35	3	0	2	43	51	50	26	1	17	2	1	27	86	0	0	2	1	1	23	0	83	1	0	36	0
OTU16705	1	0	0	2	16	6	0	11	13	0	0	0	0	1	0	0	0	0	17	0	1	21	12	0	0	0	0	0	0	13	1	0	0	0	24	0	14	0	0	0	0	0	0	0	0	20	0	0	0
OTU1671	20	15	13	0	4	0	0	0	10	0	0	0	0	0	0	0	0	1	0	19	0	1	0	0	0	0	0	0	0	0	0	0	0	20	26	0	0	0	0	22	0	0	3	0	17	0	0	33	0
OTU1672	0	0	0	0	0	5	0	0	0	0	0	0	18	2	0	1	0	0	1	0	0	35	0	0	0	40	2	0	90	0	0	0	0	0	0	0	0	0	0	0	40	0	0	6	2	0	48	10	0
OTU16729	6	21	15	21	12	59	10	11	11	1	0	0	0	0	0	0	1	0	0	0	0	0	0	0	0	0	23	29	2	0	0	0	0	0	18	0	0	2	0	0	0	0	2	0	0	0	0	4	0
OTU1674	18	12	0	11	0	19	11	19	0	0	0	0	0	0	0	30	32	0	0	0	1	0	0	0	0	0	0	0	0	0	0	34	0	0	0	24	0	22	0	0	1	0	0	41	0	24	0	0	0
OTU1677	0	15	36	0	18	0	0	5	0	0	0	0	0	16	0	0	0	0	0	12	0	9	0	0	0	0	0	0	5	0	0	2	0	77	0	44	51	87	0	0	0	0	0	0	2	52	0	0	1
OTU16777	19	5	11	0	32	24	25	20	25	0	6	0	0	17	0	1	0	36	68	77	1	24	35	0	1	0	18	0	13	14	20	1	16	1	1	1	30	82	0	0	50	2	0	0	37	36	0	46	0
OTU1679	0	3	5	1	0	0	3	4	19	0	0	1	0	0	0	0	0	0	0	0	55	2	1	0	22	28	0	0	11	0	0	0	0	1	0	0	0	0	0	2	1	0	0	0	39	0	24	24	25
OTU168	15	17	14	23	14	2	4	42	1	13	19	2	20	40	57	11	5	2	0	37	13	0	14	47	29	1	0	41	49	1	20	89	195	149	134	0	1	80	1	80	1	117	504	0	29	0	42	28	0
OTU16820	108	173	105	87	81	118	150	175	83	3	9	1	0	0	1	0	24	0	0	1	0	0	7	0	0	0	0	1	25	1	19	0	1	0	0	0	0	1	1	17	2	42	48	8	40	1	0	2	0
OTU1683	0	0	0	0	0	10	0	0	0	0	0	0	0	0	1	1	18	0	0	0	1	0	0	32	0	0	0	0	27	6	0	1	111	0	0	0	0	1	0	30	0	0	0	0	70	0	0	0	51
OTU169	62	89	81	57	131	28	26	79	116	0	1	0	1	0	1	0	1	1	0	0	0	0	0	0	0	0	0	0	0	0	1	0	0	0	0	59	0	0	0	0	0	0	0	0	2	0	0	0	0
OTU1690	0	5	10	0	7	6	0	1	0	1	0	0	0	21	0	0	0	2	0	0	0	2	0	0	17	0	0	0	0	0	63	32	1	0	58	0	1	0	0	0	0	0	0	45	26	0	0	41	27
OTU1695	0	0	0	0	0	0	0	0	0	0	0	0	6	44	0	0	0	0	0	0	0	0	0	0	0	8	16	0	0	0	1	0	0	0	0	0	0	1	0	0	0	0	0	25	0	7	0	0	0
OTU1699	0	12	0	1	0	17	0	24	20	0	12	0	0	0	1	0	0	0	4	0	0	0	0	0	57	0	0	0	3	0	0	0	0	0	0	0	0	0	0	0	0	6	0	25	24	0	0	0	0
OTU17	710	551	714	561	649	521	433	446	641	117	77	37	181	407	95	198	268	260	356	291	271	333	340	607	335	271	238	744	376	401	363	230	600	186	579	266	350	758	161	474	390	177	489	189	580	416	512	556	499
OTU170	24	6	78	43	33	39	21	19	22	36	23	33	28	30	138	97	101	109	100	104	47	36	37	24	119	35	31	38	90	28	79	0	40	62	41	101	72	95	60	85	131	93	39	40	43	3	81	67	126
OTU1703	0	0	0	11	0	1	18	0	5	0	1	0	0	0	1	0	0	0	21	0	0	0	0	0	0	0	0	27	0	0	0	50	0	0	0	0	0	0	0	0	0	1	0	0	0	0	0	0	0
OTU17039	0	0	0	4	3	6	0	0	3	0	0	0	0	0	0	26	14	0	0	0	0	0	0	0	0	14	0	26	0	0	58	0	0	0	0	42	0	7	0	0	0	0	0	9	0	0	0	17	0
OTU1704	9	0	1	23	16	10	1	0	0	0	0	0	0	0	0	81	0	0	0	0	0	0	11	0	0	0	0	0	0	0	1	0	0	0	0	0	0	0	0	2	0	33	0	0	20	0	1	0	18
OTU1707	2	13	0	4	6	2	17	3	24	2	15	1	10	1	69	1	21	41	29	47	62	45	0	27	15	0	46	0	2	0	0	1	3	0	1	0	2	1	0	1	92	1	30	13	26	0	0	25	22
OTU17078	0	0	0	3	0	0	0	0	0	0	0	0	0	9	0	1	0	0	70	3	0	1	0	38	1	0	0	0	0	1	0	37	44	1	1	0	0	17	0	0	0	1	1	1	0	0	0	0	3
OTU171	75	44	49	85	116	53	61	22	74	3	0	0	0	0	2	0	0	26	1	0	0	1	0	0	0	0	0	0	0	20	0	0	0	1	0	0	0	1	0	0	0	0	0	0	0	0	0	0	0
OTU1710	8	0	0	0	0	5	0	2	0	0	0	11	0	0	0	28	1	0	0	47	29	0	28	0	0	0	1	0	0	0	0	0	0	0	0	42	0	0	0	0	0	0	0	26	0	0	0	0	33
OTU1712	1	5	23	0	0	0	0	4	0	10	18	4	0	1	1	0	21	0	1	0	22	0	0	0	21	0	0	0	21	11	0	1	42	1	47	0	0	0	0	2	0	0	34	0	0	0	0	0	0
OTU1714	0	0	0	0	0	1	0	0	0	0	0	0	0	1	15	15	0	2	0	1	29	0	0	0	0	0	0	0	0	39	0	0	0	0	0	0	0	1	0	0	0	0	0	26	1	1	0	0	55
OTU1715	0	1	0	0	1	0	6	0	0	0	0	0	0	5	0	11	1	0	0	1	0	0	0	1	0	0	0	0	0	0	0	0	0	0	0	0	0	11	32	0	52	0	0	0	33	0	0	5	1
OTU1717	3	7	30	0	0	15	0	26	7	0	0	0	0	0	0	0	0	0	0	0	0	0	0	0	0	0	0	0	17	0	0	44	0	69	0	0	0	0	0	42	0	0	0	0	0	0	0	0	0
OTU1719	4	12	0	0	0	2	0	3	1	0	0	0	0	21	0	0	0	0	0	0	1	0	1	0	0	0	0	0	0	2	0	0	0	0	0	54	0	33	0	0	0	0	48	0	0	0	49	23	0
OTU172	24	41	40	41	41	87	37	6	55	19	32	1	10	97	32	4	50	29	0	22	3	41	61	4	3	39	4	51	27	109	132	25	108	50	20	3	6	2	2	3	79	49	66	25	66	69	97	21	71
OTU1723	19	15	32	9	26	15	4	59	7	20	12	9	0	39	37	38	0	92	57	0	0	22	75	0	1	0	0	1	118	23	0	2	0	0	2	15	19	2	0	0	0	0	0	0	37	0	0	0	3
OTU1725	0	0	0	0	0	4	10	0	0	0	19	0	0	14	1	1	0	1	0	2	1	0	1	1	1	0	36	1	1	34	0	1	0	36	1	0	0	0	24	0	0	0	0	0	24	0	0	0	49
OTU1728	0	0	0	5	10	27	1	23	0	1	5	0	0	1	0	60	1	0	0	22	0	0	0	1	21	0	0	0	14	44	0	101	0	0	0	0	33	11	41	0	0	0	0	0	17	0	0	0	0
OTU173	0	1	0	10	10	0	5	20	0	3	5	5	1	1	11	28	4	15	64	37	1	0	0	66	16	12	8	11	57	9	39	0	24	30	14	3	68	30	0	0	42	0	28	1	0	10	60	92	20
OTU17334	0	10	1	0	5	26	0	21	0	0	0	0	0	0	37	17	0	1	3	42	0	0	0	0	0	0	0	0	7	0	0	0	0	0	0	0	0	0	0	0	0	0	31	0	0	0	0	1	0
OTU17346	0	0	0	0	0	0	15	12	0	1	0	0	0	0	0	1	0	0	1	0	0	0	0	0	0	0	0	2	0	0	0	0	0	0	0	0	0	0	0	0	30	0	0	2	0	0	0	0	0
OTU1737	2	1	0	0	0	1	0	0	0	0	0	1	27	0	0	2	1	1	0	0	0	0	0	20	2	0	2	0	9	0	0	2	0	1	0	1	0	0	0	0	0	0	0	0	30	34	24	0	0
OTU1738	0	0	3	0	2	0	0	0	3	8	0	0	0	42	0	64	28	20	0	0	0	0	0	37	0	0	0	0	14	31	64	1	1	0	13	0	47	25	0	133	0	0	0	21	13	1	0	0	0
OTU174	0	30	25	29	62	22	37	50	34	35	58	7	0	57	18	181	31	32	42	79	47	48	22	19	3	38	82	103	78	35	17	78	114	81	68	44	40	37	58	98	56	36	21	2	57	53	95	97	64
OTU1745	0	0	0	0	0	0	0	0	0	0	0	0	0	0	0	0	0	0	0	19	0	0	0	0	0	0	0	0	0	0	29	0	0	0	0	0	0	0	0	0	0	1	0	0	3	0	0	96	0
OTU1748	15	1	2	0	0	0	0	0	6	6	0	12	0	1	0	1	1	0	22	0	0	0	0	0	30	12	0	49	1	0	0	0	0	1	0	0	0	0	0	0	0	0	71	0	0	0	0	0	0
OTU175	62	39	39	32	45	29	27	80	71	39	0	8	40	38	53	0	54	56	6	33	23	54	30	57	97	0	72	0	66	2	219	49	51	54	0	2	43	24	127	40	0	1	63	128	52	66	32	21	109
OTU1751	0	5	0	12	0	13	7	10	0	0	1	0	4	1	33	0	1	0	0	0	30	2	0	0	4	0	0	35	13	0	71	35	41	70	0	0	2	0	20	0	32	30	1	59	22	21	70	32	1
OTU1752	1	1	2	0	7	1	2	2	1	12	19	27	12	1	2	20	2	16	4	2	40	1	30	0	0	1	11	33	51	1	115	36	1	1	3	2	0	1	33	1	0	0	35	0	36	43	26	3	1
OTU1753	0	0	0	3	1	0	11	6	0	0	0	0	0	0	0	39	0	1	27	21	0	6	0	0	24	0	1	0	6	0	0	90	0	0	91	0	18	3	33	0	2	0	0	0	0	0	0	7	0
OTU17559	13	0	0	20	0	0	25	0	0	0	3	0	0	0	0	0	0	0	0	0	0	0	16	0	0	7	0	0	0	0	0	0	0	0	0	0	0	0	0	3	0	0	0	0	3	11	0	67	0
OTU1756	0	0	0	0	0	0	0	0	5	0	0	3	0	0	1	1	0	0	0	0	0	0	0	0	0	14	0	0	0	0	0	0	17	0	0	0	0	114	0	68	0	27	0	0	0	0	0	0	0
OTU1757	0	0	0	0	0	5	0	0	0	0	0	0	0	0	0	0	0	0	1	0	0	0	0	0	0	0	0	0	1	1	0	50	0	0	0	0	0	0	0	0	0	1	0	34	1	0	0	0	0
OTU17585	0	5	0	2	3	6	0	0	10	8	0	1	0	0	11	0	4	30	0	1	0	0	0	0	1	15	0	1	14	0	0	1	0	0	0	51	0	0	0	0	1	8	0	0	25	0	0	36	0
OTU1759	0	11	3	4	17	0	0	20	0	8	0	0	0	0	0	0	0	46	48	0	0	0	0	8	1	0	0	38	0	0	0	0	94	0	0	0	0	49	0	34	0	0	0	0	0	36	0	0	0
OTU176	26	26	43	29	35	43	32	65	65	23	12	3	1	7	93	73	71	6	5	26	70	12	52	48	157	10	45	123	20	62	2	199	102	39	4	58	1	43	70	81	99	25	164	34	168	4	63	0	87
OTU1760	8	3	7	0	22	0	0	0	0	0	2	0	17	2	1	29	30	2	0	0	1	0	5	0	34	1	1	0	55	83	0	0	42	1	1	0	1	0	0	0	0	13	1	0	59	0	0	0	14
OTU17660	54	28	22	9	26	7	11	18	19	0	1	3	0	2	4	3	3	2	4	2	1	7	3	5	5	5	4	6	12	17	2	0	5	3	0	2	1	6	27	2	2	29	10	1	34	0	0	0	0
OTU177	18	0	1	1	4	25	14	0	0	12	0	10	13	81	17	80	73	46	75	49	34	11	35	38	0	11	99	91	50	25	147	51	130	142	101	40	424	117	68	200	101	50	48	152	78	4	126	28	103
OTU1772	0	33	0	9	1	29	16	0	22	0	9	9	1	1	3	25	1	1	2	2	0	1	0	1	27	1	0	51	0	26	44	0	20	1	0	0	0	36	0	41	0	44	0	38	3	19	0	0	0
OTU1774	3	0	12	14	8	10	0	1	0	0	19	12	0	1	0	87	0	2	46	1	0	0	0	40	0	46	0	0	0	0	0	100	1	147	1	0	0	38	0	211	1	1	0	0	0	0	59	1	45
OTU178	3	0	7	0	0	6	11	5	9	0	13	0	4	27	2	45	11	37	4	14	0	12	0	7	1	0	67	0	3	10	0	11	1	70	20	74	7	48	104	4	0	37	15	27	28	17	6	36	31
OTU1782	0	0	11	4	0	1	0	1	1	1	0	2	1	32	3	0	2	27	2	57	2	0	0	2	1	1	110	1	26	1	1	3	1	2	49	0	0	0	43	0	1	7	0	0	54	38	0	0	0
OTU1783	17	8	0	1	0	1	0	7	4	15	0	7	0	3	20	37	32	1	0	1	39	1	16	69	0	27	0	0	0	0	28	0	0	106	19	1	0	40	54	0	1	0	0	1	1	7	0	0	0
OTU1784	23	0	0	0	0	0	0	0	0	0	7	0	0	7	0	1	0	1	60	0	1	0	0	0	1	25	32	0	14	0	10	41	0	0	1	0	1	57	0	0	0	0	0	0	10	0	0	0	0
OTU1787	0	0	0	0	7	10	0	0	14	0	0	12	0	28	0	22	0	0	0	0	0	0	0	0	0	0	0	0	6	0	0	0	0	0	0	4	0	8	0	0	1	59	0	0	12	0	0	0	0
OTU179	0	0	1	0	9	1	0	12	25	0	0	0	0	1	0	33	3	67	13	35	27	20	0	0	69	3	53	0	0	0	0	0	46	0	13	0	0	106	40	0	0	0	1	0	0	0	3	0	54
OTU1795	2	14	16	5	11	0	2	7	9	7	0	4	0	0	21	46	24	0	28	0	18	9	19	1	13	0	0	2	0	0	3	2	0	0	0	2	1	36	1	14	24	1	29	0	32	0	0	1	0
OTU17956	31	19	55	22	24	19	7	52	20	15	0	9	0	2	0	56	0	0	1	0	0	29	57	3	85	12	5	3	18	23	2	1	1	2	26	91	0	16	5	0	0	17	0	1	34	1	16	20	24
OTU1796	0	0	12	6	0	9	0	4	11	0	6	11	0	0	0	0	0	0	0	0	0	0	0	0	0	1	0	0	0	0	0	0	0	0	0	0	0	0	0	0	0	0	0	0	0	0	0	0	66
OTU1798	14	0	0	0	4	2	1	13	0	0	0	0	0	0	0	1	0	0	0	37	0	0	0	0	0	0	29	0	0	0	0	1	16	27	0	0	0	1	0	45	0	0	15	0	12	0	0	16	0
OTU18	238	188	191	176	218	233	268	264	268	99	78	145	101	323	940	464	482	690	542	556	872	337	514	391	437	163	424	643	389	389	412	667	757	644	578	649	328	485	769	480	433	571	559	557	587	502	767	539	482
OTU180	30	22	3	24	8	16	12	19	16	47	19	6	2	2	45	1	46	40	40	2	58	27	25	43	27	13	23	31	28	142	70	36	0	98	48	10	22	1	76	0	29	86	65	64	14	2	0	0	71
OTU1801	1	0	24	0	20	0	21	11	4	0	0	0	0	12	0	1	0	0	0	0	0	0	0	0	0	0	0	0	0	0	0	0	0	0	0	0	0	0	0	0	0	0	0	0	0	0	0	0	0
OTU1809	0	38	5	40	2	30	0	0	0	0	0	0	0	0	0	0	0	0	0	0	0	0	0	0	0	0	0	0	0	0	0	0	0	0	0	0	0	0	0	0	0	0	10	0	0	0	0	0	0
OTU181	3	0	17	5	14	27	1	20	16	0	29	19	33	0	22	0	3	29	50	62	0	49	9	5	0	0	1	27	7	61	195	122	0	0	0	2	0	0	1	6	53	31	52	0	48	0	0	0	31
OTU1810	17	16	0	7	1	14	22	0	9	0	0	0	0	0	17	0	3	26	8	5	42	1	0	0	0	13	1	0	2	0	16	0	3	2	1	0	0	34	0	46	25	1	0	0	60	0	0	59	1
OTU1813	1	14	20	35	18	0	0	0	12	10	0	0	0	0	0	0	0	19	53	0	0	0	19	1	0	55	0	1	0	7	28	0	0	0	0	1	25	46	28	1	1	0	63	34	36	1	0	0	0
OTU1819	0	0	0	0	0	3	0	0	0	0	0	0	0	0	0	63	0	0	0	0	0	0	0	0	0	46	0	0	1	23	0	0	0	37	34	1	0	0	4	0	0	0	0	0	10	0	0	0	0
OTU182	0	0	8	2	5	1	17	1	10	1	0	7	1	0	37	0	0	56	43	2	24	0	1	36	49	0	76	1	7	63	0	83	0	0	31	92	0	40	1	36	61	0	59	0	14	62	1	0	0
OTU1820	0	0	0	1	0	22	0	0	0	0	10	0	0	0	20	29	5	6	0	2	1	47	0	0	80	0	74	23	6	0	76	45	0	54	48	5	0	0	59	0	49	1	0	0	22	30	0	0	0
OTU18213	0	0	5	0	15	1	2	0	11	0	1	0	0	1	0	1	30	0	37	1	0	0	1	0	29	11	1	1	0	63	46	0	0	0	0	0	0	0	0	0	2	1	0	0	31	0	0	0	0
OTU1822	0	1	5	0	4	0	0	0	0	7	0	13	0	0	2	57	1	1	0	0	0	43	0	2	0	0	0	15	0	0	0	48	19	0	0	0	1	0	22	0	1	0	0	0	0	0	0	0	67
OTU1824	0	11	0	20	16	22	0	0	0	0	0	0	0	0	0	39	0	0	0	0	28	0	0	0	0	0	45	0	8	0	0	0	55	0	30	0	0	0	0	0	0	0	0	76	0	0	66	0	0
OTU1825	0	4	0	0	0	0	0	0	0	0	0	0	0	0	0	0	0	0	0	26	0	0	0	0	0	0	0	0	0	0	0	0	0	0	0	0	0	0	0	0	0	0	0	0	0	0	0	0	0
OTU18282	1	18	0	0	17	1	0	0	0	0	0	7	0	44	41	2	1	31	0	0	1	0	1	13	0	0	0	0	0	0	0	0	0	0	0	2	0	1	42	1	1	0	0	0	0	39	29	0	0
OTU1829	0	28	0	26	19	28	6	10	26	0	0	0	0	0	0	0	0	0	0	0	0	0	0	0	0	0	0	0	0	0	0	0	0	0	0	0	0	0	0	0	0	0	0	0	0	0	0	0	0
OTU183	1	7	13	22	14	6	15	8	7	0	0	0	2	1	51	29	1	0	3	33	0	37	0	41	28	16	1	0	16	29	44	1	129	0	0	1	75	2	0	0	165	0	0	22	2	39	93	104	5
OTU1830	16	31	11	16	36	14	8	8	30	0	0	14	6	1	0	67	25	0	0	0	0	0	0	24	0	0	16	0	9	22	1	0	0	1	0	0	17	1	38	0	0	19	1	0	0	1	0	0	35
OTU1838	13	0	23	21	1	1	15	12	3	6	5	3	0	5	26	68	4	50	2	68	2	1	1	5	10	3	4	1	26	0	0	1	3	1	0	0	0	0	1	0	0	1	27	0	24	0	1	0	0
OTU1839	0	0	6	0	0	0	0	0	0	0	5	0	0	24	0	4	43	1	0	2	0	0	0	30	0	19	26	0	31	0	0	0	0	0	0	4	0	23	0	0	0	2	0	0	33	0	0	0	43
OTU184	92	10	48	24	41	19	62	65	34	0	0	11	14	16	1	14	0	0	0	0	0	0	2	0	0	0	62	22	2	1	0	0	34	15	0	26	20	1	0	0	3	0	0	0	0	27	0	0	0
OTU1841	13	0	0	0	0	0	0	0	0	0	0	0	0	39	0	3	43	0	47	0	0	0	0	0	0	0	31	0	0	0	0	0	0	0	0	0	0	0	0	42	0	0	0	0	10	0	0	0	109
OTU18462	12	7	12	13	15	23	8	0	16	6	0	0	3	20	0	22	64	0	0	0	1	0	0	37	0	0	0	0	13	0	40	0	0	33	99	62	45	20	24	0	0	30	1	0	22	0	19	0	0
OTU185	35	71	67	52	48	71	11	56	48	15	0	7	58	63	2	147	58	54	35	84	210	185	96	75	36	4	3	82	60	327	413	76	93	2	42	35	39	91	119	73	79	13	210	126	36	92	73	11	96
OTU1851	8	6	0	0	0	0	9	27	1	0	0	0	0	0	0	0	1	0	0	0	0	0	29	0	0	1	0	0	21	0	0	0	0	48	0	39	1	31	0	0	0	0	0	35	0	0	0	0	0
OTU18514	14	0	10	3	0	11	1	0	0	0	0	1	3	1	0	1	32	0	0	35	34	0	0	0	0	0	0	0	11	6	2	1	0	0	0	57	0	2	7	27	1	0	0	30	0	0	0	0	1
OTU1853	0	13	29	0	0	6	0	0	0	0	0	0	0	18	0	0	17	0	0	30	0	0	2	0	31	0	0	0	4	0	0	0	34	0	0	0	0	1	0	1	0	0	0	0	19	0	21	0	0
OTU1854	0	5	11	0	0	0	0	0	32	0	0	0	0	0	0	0	0	0	0	0	0	0	0	0	0	0	77	0	1	0	0	0	0	72	0	49	0	0	0	0	0	0	0	0	38	0	0	0	0
OTU18589	181	159	182	189	185	121	150	157	152	1	0	20	0	6	0	51	0	2	63	2	1	1	146	0	33	1	82	47	26	25	54	147	0	0	83	30	0	41	1	62	2	0	1	71	0	0	1	1	43
OTU186	55	77	39	67	75	54	60	74	106	11	7	10	0	43	41	38	17	159	129	2	46	43	28	46	70	21	44	73	100	116	62	76	65	36	55	37	36	54	34	66	3	12	24	38	49	0	105	22	87
OTU1864	0	0	0	0	4	1	0	0	0	0	0	0	0	0	0	0	66	0	0	42	33	0	0	0	0	0	0	0	27	0	0	0	0	0	0	0	0	0	0	0	0	0	0	0	0	19	26	0	0
OTU187	31	20	7	14	14	17	16	15	11	0	0	3	1	0	1	63	2	6	9	1	1	17	0	0	32	17	80	40	0	0	40	17	43	44	24	23	66	0	77	75	0	30	0	1	1	0	21	0	20
OTU1871	2	5	15	8	0	3	7	19	6	1	7	0	0	0	0	20	0	1	55	16	12	0	21	27	33	0	0	0	36	0	0	0	0	1	26	37	0	46	0	36	1	0	1	2	0	0	0	0	1
OTU1876	12	22	58	18	0	0	0	0	15	1	0	0	1	2	35	1	3	0	1	1	33	17	13	59	1	4	5	28	97	76	2	1	5	3	46	2	0	65	1	30	0	1	41	0	1	35	0	10	0
OTU1878	0	0	0	26	0	13	4	57	0	0	0	0	0	0	0	0	0	0	0	0	0	0	0	0	0	0	0	0	0	0	0	0	64	0	0	0	0	0	0	0	0	0	0	0	0	0	0	0	0
OTU1879	27	8	11	44	7	22	0	19	24	0	0	0	0	1	0	0	0	0	0	0	0	0	0	0	1	0	0	0	0	0	31	0	0	0	0	0	0	0	0	0	0	0	0	0	0	0	0	0	0
OTU188	50	41	9	101	40	60	5	50	53	34	15	0	1	0	0	0	0	0	0	0	0	0	0	14	14	0	0	0	4	11	0	1	0	1	24	0	0	0	0	0	0	0	0	2	12	0	0	0	0
OTU1885	0	0	0	0	0	0	0	0	0	0	0	1	0	0	0	0	0	0	0	0	0	0	0	24	26	0	0	38	4	0	23	0	0	0	0	0	0	0	0	0	0	21	0	0	0	77	0	0	0
OTU1886	0	0	1	1	0	0	17	0	0	0	0	1	6	0	0	0	2	0	0	0	0	0	0	0	0	35	0	0	1	47	0	0	0	0	1	1	1	0	0	0	0	0	0	0	0	30	0	0	0
OTU18860	0	5	0	0	1	26	7	13	13	0	0	2	0	0	23	21	67	0	0	0	22	7	10	0	0	0	27	0	19	5	0	1	0	20	53	0	0	0	0	0	7	0	0	25	0	0	15	0	1
OTU1887	7	0	1	0	1	6	4	0	5	1	0	0	15	0	0	0	0	19	13	0	0	0	0	32	0	2	29	0	13	0	0	0	0	58	1	0	0	0	21	0	0	1	0	0	0	15	24	0	0
OTU18899	0	5	30	0	0	0	2	0	0	1	25	7	7	0	1	37	0	50	0	0	21	0	0	0	0	2	0	19	4	1	0	32	0	51	0	0	62	0	1	95	0	0	20	30	26	1	0	75	0
OTU189	62	30	33	0	43	12	0	13	24	11	0	0	1	2	1	51	95	0	57	1	1	1	0	0	54	0	0	3	1	3	0	0	0	0	2	0	1	24	1	1	89	83	35	0	56	0	41	0	24
OTU1891	7	4	0	3	0	0	0	0	0	0	0	1	0	0	0	8	16	95	6	0	1	1	18	18	0	19	27	0	51	18	52	1	0	2	79	24	0	14	3	1	1	23	5	0	0	0	8	1	1
OTU1896	0	0	17	0	0	0	22	0	0	0	0	2	0	0	41	0	0	0	0	0	0	4	0	0	0	1	0	44	0	1	0	0	136	40	0	0	0	1	27	0	0	0	77	0	0	0	0	0	0
OTU19	610	716	620	641	742	688	603	607	783	203	341	214	239	471	325	687	435	705	322	587	565	545	334	331	950	493	921	784	525	488	492	917	682	922	904	751	360	1022	773	1196	504	497	975	584	581	727	512	452	660
OTU190	37	25	15	22	37	30	8	16	15	12	57	5	2	0	27	38	0	42	31	25	0	1	6	15	0	1	0	6	63	44	2	0	44	0	1	1	0	45	98	1	6	56	26	10	70	0	63	2	4
OTU1901	2	15	0	0	0	18	7	10	58	0	0	0	0	0	1	20	0	0	0	0	0	0	0	0	0	0	0	1	0	0	0	0	0	0	0	0	0	0	0	0	0	0	0	0	0	0	0	0	0
OTU1906	0	0	10	14	14	31	21	0	18	0	17	0	14	28	4	20	21	0	31	0	0	21	0	21	0	0	0	0	0	11	1	0	0	0	0	26	0	0	21	0	2	32	1	0	0	0	1	0	1
OTU19060	0	1	0	1	9	0	12	0	1	0	0	0	0	23	0	0	0	0	1	2	0	3	0	1	1	0	28	1	0	22	3	2	0	0	15	0	0	18	66	0	0	1	22	2	2	0	3	19	20
OTU19079	0	1	1	0	0	1	0	0	12	0	0	1	0	0	1	0	0	0	0	1	1	0	0	0	0	3	1	48	35	0	0	0	0	0	0	1	0	34	1	0	0	0	0	0	0	0	0	0	0
OTU191	15	5	10	36	26	23	19	12	27	16	26	16	29	14	17	0	14	8	119	47	34	38	26	38	73	2	55	82	38	16	64	19	0	44	89	62	0	53	39	103	0	24	28	3	19	32	0	49	0
OTU19167	1	1	9	0	6	0	0	1	10	0	0	18	5	0	0	0	2	0	0	1	0	0	0	0	51	15	0	0	0	57	42	0	0	0	61	66	0	0	0	152	0	0	5	0	1	1	0	0	0
OTU1918	0	12	18	13	38	20	17	32	0	13	0	0	0	0	0	3	1	0	1	39	0	58	71	0	0	0	0	0	0	0	0	57	45	1	0	40	0	17	0	49	0	0	0	64	6	41	0	0	0
OTU192	13	4	27	33	11	14	34	10	23	28	13	20	16	95	180	241	82	2	151	130	42	195	29	213	145	93	122	116	66	306	30	106	140	0	37	27	168	65	23	108	94	1	133	49	133	23	101	229	21
OTU1921	0	0	6	11	5	6	0	5	9	0	0	0	0	0	0	0	0	0	0	37	0	0	0	0	33	0	23	0	0	34	0	0	0	31	1	0	0	0	0	0	0	0	0	1	1	1	0	0	47
OTU1923	0	11	6	13	0	0	0	5	0	0	0	0	4	0	0	0	2	0	1	25	22	0	0	0	0	0	0	1	0	33	0	0	32	0	0	41	0	0	1	0	0	0	0	0	9	0	0	0	23
OTU19234	3	0	5	5	0	1	0	9	2	9	3	5	0	0	35	0	3	0	13	2	0	25	23	0	0	0	0	0	15	20	75	0	28	0	0	35	1	0	64	0	77	0	0	31	29	0	0	0	0
OTU19241	94	83	78	73	65	48	40	24	45	12	31	7	11	0	9	11	0	92	0	0	12	4	2	6	0	2	0	0	10	0	0	35	27	49	1	50	0	29	1	0	3	1	2	47	2	47	47	21	2
OTU1925	5	0	0	0	0	0	0	0	0	0	0	8	0	22	0	0	0	35	40	0	22	0	0	0	0	0	0	0	10	1	0	0	0	30	0	1	0	38	0	30	0	0	1	0	0	0	16	46	0
OTU19291	3	0	0	0	0	0	0	0	0	1	0	0	0	15	3	18	0	1	0	4	1	9	0	0	0	11	0	0	1	24	0	18	0	1	31	1	1	0	1	0	41	0	0	0	0	0	7	1	0
OTU193	37	39	23	17	50	23	59	57	25	0	0	13	0	35	47	6	4	3	8	7	61	40	13	2	3	2	6	2	30	9	2	22	39	1	2	0	1	70	10	0	7	5	4	39	52	0	1	0	1
OTU1931	0	4	0	0	0	0	0	7	0	6	0	0	0	0	2	0	0	0	0	28	0	0	0	25	0	31	0	61	0	0	0	0	0	0	0	0	0	0	14	0	0	0	0	0	0	2	0	0	1
OTU19335	1	0	0	1	5	10	0	9	0	1	3	0	11	2	1	1	2	3	1	0	14	2	0	0	2	2	2	0	0	1	0	1	1	0	1	0	1	1	1	0	1	0	1	1	0	9	0	0	0
OTU1939	0	0	8	0	0	0	0	0	9	2	0	0	0	2	0	1	0	0	2	0	0	1	29	1	1	1	40	29	0	72	0	0	150	1	0	25	1	0	0	0	0	12	0	0	0	0	0	0	0
OTU194	11	10	4	17	32	37	1	42	21	15	3	13	31	1	28	18	0	2	1	0	0	0	72	0	0	1	159	29	30	0	39	0	29	2	0	0	0	54	0	82	1	32	41	52	10	4	1	3	32
OTU1944	14	3	0	0	2	16	10	32	1	5	1	2	0	0	1	1	0	0	0	0	0	0	0	0	0	0	0	0	32	11	0	1	0	0	77	1	0	0	25	0	0	0	0	0	0	0	0	0	0
OTU195	7	4	7	2	5	20	11	6	12	1	2	1	15	34	33	1	49	2	1	2	42	17	4	3	8	10	6	36	40	61	63	36	3	41	5	2	112	71	79	4	0	16	49	26	47	20	74	33	69
OTU1950	6	0	2	0	0	0	0	0	0	0	1	0	1	1	1	1	33	1	2	0	1	1	1	1	23	44	43	0	0	0	1	46	2	1	59	32	0	77	0	0	0	0	0	0	0	0	0	92	0
OTU1952	13	0	1	1	0	3	20	15	7	0	0	0	0	0	0	0	0	0	0	0	0	1	1	52	38	0	26	0	0	0	0	0	0	88	1	0	0	0	0	0	0	0	0	1	0	43	0	59	0
OTU1954	8	7	0	6	0	2	0	8	0	6	0	12	15	0	0	0	0	0	0	0	29	16	0	25	62	1	0	0	8	1	1	12	1	0	1	0	58	0	0	0	2	0	0	0	0	0	0	0	0
OTU1958	0	11	0	2	0	0	9	10	0	14	0	0	2	0	0	0	0	1	0	0	0	1	1	0	0	2	0	0	19	0	64	28	38	0	22	0	1	0	0	0	1	1	0	0	0	0	0	0	0
OTU196	34	12	39	23	66	60	19	29	39	0	0	0	0	24	0	61	0	0	1	0	24	2	2	2	0	0	39	1	15	18	0	29	1	1	138	0	0	0	0	1	14	0	0	0	0	0	0	0	0
OTU19633	0	9	1	1	8	0	0	1	0	14	15	0	0	0	55	0	0	5	64	0	0	0	1	0	17	5	4	0	36	15	0	1	0	6	4	1	0	13	0	0	0	0	0	1	0	43	0	32	0
OTU1964	16	38	0	12	25	0	0	10	24	0	0	0	0	0	0	0	0	0	0	0	0	0	0	0	0	0	0	0	0	0	0	0	0	0	0	0	0	0	0	0	0	0	0	0	0	0	0	0	0
OTU19648	9	0	18	0	0	11	0	0	0	0	0	0	0	0	21	0	0	0	0	26	1	0	21	17	0	0	0	0	0	0	0	0	0	0	0	22	0	3	0	0	0	0	0	0	0	28	0	0	0
OTU1965	7	16	19	0	0	0	9	7	33	0	0	0	0	21	0	0	0	0	0	0	1	1	1	3	0	0	1	1	0	1	4	51	3	2	4	3	0	0	0	0	0	0	0	0	0	0	0	0	0
OTU197	0	0	1	0	0	14	0	5	7	11	0	2	13	69	23	58	0	0	31	60	45	103	26	21	0	0	67	0	53	215	0	89	22	0	0	1	48	49	36	39	35	29	16	21	101	48	35	91	87
OTU1970	1	3	4	3	9	0	6	1	2	0	0	2	0	1	12	11	0	0	0	0	0	7	9	0	0	0	0	0	0	12	7	0	0	0	0	0	0	0	0	0	0	0	20	25	0	16	0	0	14
OTU1974	11	7	0	14	0	12	0	8	2	1	4	0	0	26	18	0	0	0	0	0	5	2	0	27	1	8	0	0	19	12	41	0	0	0	38	2	10	12	50	0	4	2	1	3	72	1	0	35	7
OTU1976	0	1	0	0	5	0	8	18	0	0	0	0	0	0	0	0	0	0	0	0	0	0	0	0	0	0	0	0	0	0	47	35	0	0	0	0	0	0	58	0	1	0	0	0	0	0	0	0	39
OTU198	10	10	47	41	44	20	32	30	21	24	0	8	14	13	27	70	25	33	2	3	2	47	55	4	57	1	2	43	23	7	1	1	25	0	1	97	32	3	3	138	0	6	67	5	18	38	1	2	29
OTU199	25	21	28	25	40	32	27	5	37	0	0	0	16	0	1	2	1	35	13	82	0	2	46	1	43	0	0	0	262	0	1	0	0	0	54	121	0	1	21	0	0	0	0	0	0	23	69	0	0
OTU1991	0	0	11	8	11	29	7	8	0	0	0	0	0	0	0	0	0	0	1	0	0	1	0	16	30	27	26	0	0	0	0	31	46	0	0	0	0	0	42	1	0	0	0	27	0	0	0	0	0
OTU1998	5	1	1	0	21	0	1	2	1	0	10	0	17	0	1	2	111	7	0	2	1	0	1	1	0	1	82	1	1	0	0	14	1	0	1	1	0	0	0	49	55	50	24	72	140	7	24	0	0
OTU2	10	0	0	6	15	0	0	17	8	42	16	27	30	190	12	9	10	55	13	40	14091	19037	25	26	25	30827	43	18	19	11	0	0	0	23	0	1	11	51	67	4	20	10	11	21573	15	14	0	24	0
OTU20	747	709	552	478	444	586	694	565	536	48	30	20	30	38	48	22	308	96	136	1	116	25	48	195	128	13	1	105	89	49	63	39	175	99	153	106	155	39	50	41	120	61	155	116	69	74	114	84	65
OTU200	59	67	92	48	84	76	47	74	84	1	0	3	2	1	1	0	2	0	1	2	0	0	0	0	0	0	0	0	1	44	2	1	3	0	2	0	10	1	1	0	1	1	57	0	0	0	0	0	0
OTU2002	0	1	0	6	0	0	0	0	0	0	0	0	0	0	1	0	0	0	59	2	0	0	4	19	0	0	26	0	16	0	0	17	0	0	0	0	0	0	11	12	0	0	0	0	0	0	29	33	1
OTU201	17	13	18	0	10	36	10	16	5	8	0	0	0	1	3	1	1	0	0	0	47	11	40	0	5	1	2	46	2	10	92	25	32	0	0	0	0	1	0	0	58	14	0	0	0	48	0	49	9
OTU2011	0	1	14	2	0	9	0	1	0	11	0	0	1	1	1	49	0	0	28	0	93	0	1	0	0	0	0	0	26	0	11	1	0	0	45	0	0	0	0	1	0	0	1	0	0	0	0	0	0
OTU20186	0	0	13	0	0	4	0	0	0	0	5	1	8	0	14	0	34	41	0	10	0	9	22	0	14	0	0	1	33	8	22	2	2	0	0	17	0	1	0	13	5	3	3	1	21	1	4	66	0
OTU202	18	45	27	35	79	32	33	69	76	49	40	5	1	2	41	25	67	1	14	5	64	27	37	98	37	17	1	177	37	52	48	24	54	35	21	65	122	58	63	112	2	82	101	99	137	53	83	2	223
OTU2020	6	2	0	0	0	2	0	0	4	0	1	0	0	1	0	48	0	54	3	0	0	0	1	0	0	0	16	0	0	0	0	0	1	0	0	1	0	23	0	1	1	0	0	98	0	0	0	0	42
OTU2024	10	4	19	13	1	21	0	4	0	8	0	0	0	0	0	1	1	25	2	0	0	1	0	40	0	0	0	94	11	27	41	0	0	38	43	76	1	71	27	2	0	0	25	0	0	9	0	0	0
OTU2026	15	0	0	0	0	0	0	0	8	0	0	0	0	52	0	0	0	0	0	0	0	0	0	14	2	0	0	22	0	0	29	0	39	0	0	0	0	0	60	28	0	0	0	0	1	0	0	0	0
OTU203	36	68	48	24	59	22	37	0	18	6	78	1	17	63	100	1	39	115	122	59	28	25	19	0	0	46	15	0	19	38	247	0	0	0	38	26	56	1	40	0	59	24	18	101	47	42	68	0	34
OTU2034	0	0	0	0	0	5	0	7	0	0	0	0	0	0	82	1	0	66	0	1	30	0	22	1	0	0	0	0	0	0	0	0	0	1	0	0	0	0	0	2	0	0	0	0	0	0	0	0	0
OTU20361	1	0	1	0	0	7	8	4	0	0	0	0	0	0	2	0	0	0	0	2	0	2	0	0	1	0	11	0	18	0	0	2	20	1	1	0	2	2	47	1	0	0	0	2	8	34	8	32	0
OTU204	97	34	85	73	30	23	39	40	47	5	2	6	2	0	2	69	5	4	3	2	2	0	17	1	0	1	0	1	3	29	26	29	26	25	16	18	23	1	0	4	64	30	3	2	10	0	0	0	0
OTU2042	15	8	25	0	0	2	22	2	15	0	0	0	0	0	0	0	0	0	0	0	0	0	0	0	0	6	0	25	0	61	0	0	0	24	0	2	0	0	0	0	0	0	0	0	0	0	0	0	0
OTU2049	4	0	0	0	0	0	12	0	0	1	0	0	0	0	0	0	0	0	45	0	0	1	40	0	15	0	0	41	13	0	0	0	0	43	34	0	0	1	0	0	0	0	0	1	0	66	0	0	0
OTU205	73	60	48	52	25	53	53	53	61	53	14	12	24	69	43	58	46	125	29	113	253	34	137	150	143	27	55	82	39	230	76	55	222	4	6	104	115	193	101	91	75	79	172	120	180	272	96	83	239
OTU2051	0	17	0	0	1	5	0	0	0	1	0	9	1	1	1	86	2	15	0	2	1	1	0	9	0	0	1	0	0	6	2	0	0	44	2	46	0	0	0	0	0	0	61	1	0	0	0	38	0
OTU20541	0	1	0	7	2	0	0	6	0	0	0	5	0	58	2	4	0	2	0	1	0	0	1	1	2	11	3	1	11	26	17	50	2	0	19	1	1	4	55	18	77	44	2	20	2	6	1	4	0
OTU2056	1	19	7	0	0	8	0	11	0	1	0	14	0	68	0	0	3	1	58	1	1	0	0	0	42	39	40	1	41	21	63	1	0	1	27	44	0	44	88	46	0	14	0	0	26	0	0	0	2
OTU2057	0	31	36	8	0	16	7	10	49	0	0	3	0	0	40	66	1	20	44	28	13	1	1	0	0	1	2	1	18	3	85	66	0	43	1	1	0	0	41	64	0	28	8	37	0	0	54	1	45
OTU206	67	60	68	24	78	59	60	79	48	1	0	0	0	1	2	1	1	0	0	1	0	18	2	1	1	0	2	1	1	0	2	1	0	0	0	2	1	0	0	0	0	1	0	0	0	0	0	0	0
OTU2060	13	19	8	8	0	7	19	26	11	0	0	0	5	0	0	1	0	0	2	0	0	16	0	0	0	0	0	1	0	0	3	0	0	0	0	0	0	0	0	0	0	0	2	0	0	0	0	0	2
OTU2062	0	0	0	0	5	0	0	0	10	0	0	4	0	1	25	0	0	29	0	0	58	0	0	0	0	0	0	12	0	0	0	0	0	0	35	0	0	29	0	0	47	0	0	0	0	4	0	0	2
OTU20649	61	77	30	36	33	48	56	34	49	0	0	0	0	0	0	1	0	0	0	0	0	0	0	0	0	0	0	0	0	1	0	0	0	0	0	0	0	0	0	0	0	0	0	0	0	0	0	0	0
OTU2067	1	0	1	0	0	1	2	0	0	0	0	4	9	0	27	32	1	0	19	0	2	0	61	3	37	14	0	0	1	1	0	0	0	2	3	1	46	0	0	0	0	31	1	43	0	1	76	0	1
OTU20680	0	12	0	35	1	4	17	8	5	0	0	0	2	1	0	0	0	35	3	1	0	55	0	38	33	0	0	0	0	0	0	0	0	0	0	0	66	0	0	2	1	0	0	2	0	0	0	0	0
OTU2069	0	0	2	20	0	10	5	0	0	10	7	0	0	2	28	0	0	43	0	0	0	0	12	0	0	0	16	0	0	18	39	1	63	0	32	22	28	39	18	0	99	0	0	0	0	0	32	0	0
OTU207	36	26	9	61	12	13	63	6	30	30	1	0	2	39	1	19	1	0	0	34	0	12	5	8	2	0	60	0	8	16	3	0	30	1	0	5	14	30	0	59	49	1	39	93	31	29	0	0	58
OTU2077	0	8	0	0	0	0	7	16	9	0	0	0	0	0	0	0	23	0	24	0	0	0	0	23	0	0	0	0	4	0	0	37	0	0	27	0	0	45	0	0	0	11	0	0	3	0	0	0	0
OTU20781	0	0	3	0	0	1	0	7	1	2	2	1	3	4	0	2	12	3	10	2	3	2	1	4	9	9	10	4	3	1	9	11	0	3	0	6	3	10	5	4	3	4	4	11	20	15	4	17	3
OTU2079	2	33	31	38	24	34	25	30	53	0	1	1	1	0	0	2	1	1	1	1	0	11	1	1	0	0	3	1	0	10	0	0	0	2	0	0	17	0	27	1	45	0	0	19	1	0	24	0	0
OTU208	10	12	60	49	26	23	4	30	13	13	1	7	0	7	41	8	6	68	59	22	2	18	4	86	38	2	2	79	44	32	3	36	30	84	161	3	19	4	58	30	141	22	1	53	87	14	63	0	1
OTU2081	0	0	0	0	0	9	2	10	0	13	0	0	0	1	0	0	0	1	0	0	0	0	0	1	6	0	0	0	1	3	0	1	52	0	0	0	0	2	0	0	40	0	22	1	1	0	0	113	0
OTU2084	0	12	0	14	0	0	0	0	0	0	0	0	0	19	0	0	0	0	0	53	0	0	0	0	0	0	0	0	1	0	0	0	43	0	0	0	0	0	0	1	0	0	0	0	0	0	0	0	0
OTU2086	13	7	0	17	6	7	1	22	30	0	0	0	0	0	37	16	0	0	0	0	2	0	0	0	0	0	0	0	7	0	0	0	0	0	0	0	0	0	0	0	0	0	18	0	0	0	0	0	0
OTU209	1	0	4	25	4	18	18	16	7	5	6	5	11	16	46	0	21	0	50	3	86	12	28	47	1	6	83	55	1	47	50	1	1	41	71	0	108	82	51	19	30	13	0	44	73	0	29	0	37
OTU2094	20	18	8	0	20	9	21	0	0	0	0	0	0	0	0	0	0	0	0	0	0	0	0	0	0	0	0	0	0	0	0	0	0	0	0	0	0	0	0	0	1	0	0	0	0	0	0	0	0
OTU20968	0	0	22	0	3	0	5	1	0	0	0	0	0	59	0	0	0	0	0	0	0	0	0	46	0	0	0	0	43	0	0	1	77	0	120	0	0	3	0	2	0	0	53	0	25	1	0	40	0
OTU21	134	164	198	189	164	217	160	163	149	20	32	8	98	5	77	134	73	6	120	76	23	10	65	102	37	13	27	68	66	28	56	52	125	251	1	54	16	25	80	128	95	130	171	66	107	200	199	7	161
OTU210	52	18	29	9	30	53	24	19	19	10	15	2	6	21	12	1	1	42	43	69	1	30	14	10	0	31	120	1	81	59	32	54	32	73	90	27	12	21	97	70	28	52	0	53	22	6	42	25	47
OTU21019	0	3	3	0	0	0	11	0	0	2	0	14	11	0	30	0	0	0	20	1	0	0	16	15	1	0	0	8	0	0	31	1	0	0	1	43	0	0	0	0	1	0	0	0	0	56	48	0	0
OTU2109	2	3	0	3	13	8	0	0	0	0	8	0	0	0	0	1	37	14	47	0	0	26	0	48	0	0	26	2	6	0	26	0	0	23	23	0	0	0	11	0	0	0	0	18	7	0	24	0	0
OTU211	20	18	31	31	42	66	25	41	28	19	39	12	26	68	91	80	35	112	133	3	76	64	38	73	62	49	39	188	78	40	52	94	128	28	162	62	111	0	73	64	216	71	160	79	80	98	96	33	54
OTU2115	138	222	131	76	152	116	96	84	129	69	19	29	47	64	121	150	54	156	120	157	108	103	92	94	198	92	178	191	187	77	70	132	124	192	184	233	170	137	318	107	120	98	73	144	88	140	196	46	124
OTU212	0	9	0	13	4	28	12	17	0	8	0	0	31	0	17	74	0	128	0	0	30	5	0	0	0	0	0	1	0	35	1	22	92	0	0	32	15	3	61	69	1	1	6	2	15	0	34	1	12
OTU2122	12	8	11	37	5	0	31	0	15	0	0	0	0	1	0	0	0	0	0	0	0	0	0	0	0	0	0	0	3	0	0	0	0	0	0	0	0	0	0	0	0	0	0	0	0	0	0	0	0
OTU213	1	18	13	1	0	3	0	9	4	33	4	10	4	25	18	54	42	6	26	61	48	33	0	6	29	12	55	32	35	41	13	23	0	1	69	11	47	57	9	47	102	12	17	0	30	24	1	23	0
OTU2131	0	0	0	0	0	0	0	0	0	0	0	0	0	0	0	0	0	0	16	0	2	0	0	0	0	0	0	35	13	0	0	0	0	0	1	0	0	0	0	0	0	0	24	0	0	0	0	0	0
OTU214	79	56	78	27	31	50	55	111	34	24	38	51	31	88	116	52	62	47	168	30	28	22	71	106	133	40	141	80	169	156	155	186	35	151	6	84	151	63	19	80	79	66	78	101	74	138	84	124	6
OTU21411	11	19	1	3	3	1	3	8	0	0	0	0	1	17	0	15	1	29	0	0	0	0	1	2	0	0	0	0	0	0	4	0	0	0	52	0	0	0	0	0	0	0	2	0	0	2	10	0	1
OTU215	9	0	9	46	56	21	19	6	9	3	0	0	2	31	4	64	40	2	46	5	33	23	1	0	39	4	119	3	12	5	1	2	81	44	2	5	4	59	29	67	119	5	81	88	4	34	135	2	1
OTU2151	0	0	7	0	0	0	4	0	11	0	0	1	0	53	0	0	0	1	0	40	0	0	1	0	0	1	0	1	0	34	0	37	0	1	0	0	16	30	75	1	28	22	23	1	0	10	0	0	0
OTU2152	0	0	0	0	0	0	0	12	13	0	1	0	0	0	0	0	0	0	0	0	0	14	0	0	0	0	23	0	0	29	38	0	0	0	0	0	0	17	0	0	0	0	0	70	23	2	0	71	0
OTU2157	26	22	6	3	1	18	1	1	7	12	1	0	15	60	2	3	42	2	0	1	2	2	22	0	12	0	0	0	27	3	57	21	0	0	1	0	10	25	69	2	108	11	0	0	22	0	31	60	13
OTU2159	1	0	33	0	7	31	0	19	0	14	7	2	0	0	0	0	0	0	0	0	0	28	0	20	0	0	0	36	17	1	0	19	0	64	0	0	2	0	0	0	1	0	0	0	16	0	0	0	4
OTU216	51	19	46	27	46	13	39	8	46	9	0	0	49	0	1	28	1	40	13	55	0	0	78	59	25	17	0	1	4	0	2	12	0	123	0	3	31	0	17	19	1	0	45	0	0	53	1	0	0
OTU2162	0	0	0	1	0	5	2	0	0	0	9	0	0	0	0	0	1	0	0	61	0	0	30	11	27	0	0	0	20	65	0	0	1	0	24	0	0	0	0	3	0	0	53	0	42	64	0	0	9
OTU2165	20	5	0	12	0	4	10	0	0	1	0	6	0	0	0	40	0	0	0	24	0	0	0	18	0	0	0	0	16	22	0	0	19	0	0	0	0	0	0	0	0	0	35	0	7	0	37	19	1
OTU21666	0	0	1	4	0	0	0	0	0	1	0	0	0	3	0	0	1	1	0	27	0	0	1	1	0	0	23	2	0	81	0	10	23	2	1	1	1	0	0	24	1	0	0	0	2	0	0	0	29
OTU217	75	6	8	0	17	4	0	6	0	8	1	0	0	43	32	22	54	0	1	0	0	0	0	16	51	0	19	1	14	166	17	106	0	1	0	21	1	24	0	9	37	3	0	2	1	0	12	19	0
OTU2170	0	11	0	6	0	15	5	24	1	1	0	9	0	0	0	0	27	0	0	0	0	0	0	0	0	0	0	0	0	0	0	0	0	1	0	108	41	0	0	0	0	0	0	0	0	0	0	0	28
OTU218	13	13	0	5	0	0	0	9	9	5	0	12	0	33	64	124	6	0	24	36	31	0	0	0	61	0	26	0	5	8	0	21	0	0	102	0	1	0	0	0	3	1	12	0	0	0	0	0	0
OTU21875	0	0	0	4	1	3	0	0	12	5	5	4	2	8	22	0	1	13	0	75	5	19	11	0	76	2	97	1	0	11	0	0	41	20	0	29	137	3	0	26	2	11	12	0	0	8	8	0	0
OTU219	46	26	30	55	26	26	30	77	32	2	1	0	0	0	0	2	0	0	0	0	0	1	2	7	47	0	0	0	19	18	0	0	1	0	0	74	17	11	20	0	0	29	0	46	41	24	0	0	40
OTU2191	0	17	1	0	1	0	13	0	3	0	0	2	22	30	19	0	1	57	0	32	1	0	1	0	48	0	1	1	1	23	0	0	3	1	40	0	1	0	0	0	0	0	0	28	0	0	0	0	0
OTU2193	0	0	0	0	0	0	0	0	0	0	0	1	0	0	0	29	0	0	0	0	0	50	0	1	0	1	0	0	5	12	1	0	1	0	38	0	0	0	0	0	0	0	0	27	0	0	0	0	24
OTU2195	0	0	0	0	9	0	0	1	0	0	0	0	0	0	16	0	0	0	0	0	0	30	0	0	0	1	1	55	0	22	0	57	1	1	1	0	0	26	0	0	0	1	0	0	0	0	0	0	1
OTU2199	45	12	0	14	15	4	7	18	4	0	0	0	0	0	42	0	35	1	0	1	0	1	0	0	0	0	0	0	0	1	0	0	0	0	0	0	0	1	0	20	0	0	0	0	3	1	0	41	3
OTU22	77	21	48	15	17	77	59	35	60	15	52	12	2	56	87	66	146	64	19	200	99	25	84	68	129	44	70	79	59	44	254	120	27	160	145	77	51	119	126	117	35	24	22	98	126	55	112	245	156
OTU220	35	21	11	7	16	17	9	35	33	1	0	8	10	51	40	1	32	14	21	44	0	36	0	49	4	2	20	122	2	13	1	37	1	38	3	0	0	50	1	63	50	0	18	131	51	109	41	18	7
OTU2200	50	1	37	36	63	50	59	28	58	0	12	0	11	103	148	34	47	68	40	49	62	34	19	0	17	6	32	20	87	1	34	31	96	92	44	81	114	79	58	32	50	64	51	0	30	10	17	33	59
OTU2203	0	14	0	0	0	12	6	17	0	0	24	0	19	0	0	35	0	40	0	1	29	0	0	36	0	0	0	34	23	0	29	0	0	0	0	1	0	0	45	34	0	0	0	0	0	0	0	0	0
OTU22085	0	6	16	0	0	0	0	0	6	0	0	0	0	0	0	33	0	0	0	0	0	0	0	4	1	0	1	0	13	1	0	24	0	0	32	0	0	0	0	1	0	1	0	0	0	0	0	0	1
OTU2209	0	0	0	4	2	0	9	0	0	0	1	0	1	0	0	0	59	0	0	0	0	22	0	0	0	0	0	0	6	0	0	0	0	0	0	0	0	0	0	0	19	0	0	0	0	0	49	0	0
OTU221	22	86	49	91	46	13	46	0	16	0	0	0	0	26	0	49	3	0	0	1	1	0	1	1	1	0	0	0	0	2	0	49	0	0	0	0	0	0	0	0	0	14	0	0	0	0	0	0	0
OTU22125	5	22	11	5	15	26	18	3	15	1	6	0	8	0	1	1	36	0	9	4	0	0	5	4	34	12	1	4	59	1	0	0	0	0	1	0	8	10	2	0	2	25	7	7	3	6	52	0	0
OTU2213	0	0	0	0	0	0	0	0	3	5	0	0	0	3	50	53	0	21	0	3	0	0	0	0	0	1	0	0	0	0	1	0	0	0	27	1	0	35	0	0	0	0	0	0	0	0	31	0	27
OTU22183	0	4	0	0	0	0	0	5	0	0	0	0	0	0	0	0	0	0	36	0	0	0	0	0	0	21	0	0	0	33	0	45	0	0	0	14	2	19	0	58	0	38	0	0	15	0	0	0	0
OTU222	17	12	16	43	57	22	18	17	7	8	5	28	22	79	95	29	85	36	67	55	0	37	21	65	63	27	1	54	79	49	18	19	22	13	144	57	11	43	38	19	60	41	51	3	90	138	49	1	74
OTU2224	16	9	25	0	0	6	0	21	0	0	0	0	0	0	0	0	0	0	21	36	0	17	22	0	0	0	0	0	0	0	0	0	0	0	0	0	0	0	0	0	0	0	0	4	0	0	52	0	0
OTU223	12	40	18	16	6	26	35	1	13	0	10	4	4	0	12	40	21	23	1	19	56	28	27	40	1	0	0	32	0	46	0	0	35	0	0	0	0	16	34	15	0	1	0	21	13	3	71	38	36
OTU224	8	15	77	36	34	76	9	52	76	1	5	10	0	45	59	102	0	54	14	45	50	0	28	0	16	5	130	0	148	16	35	0	52	0	51	28	13	70	35	259	0	2	52	30	34	21	1	29	59
OTU22403	33	12	21	0	36	22	12	11	34	0	1	0	0	0	0	0	1	0	0	0	0	0	0	1	0	0	0	0	1	0	0	0	0	0	0	0	1	0	1	0	1	0	0	0	1	1	0	0	0
OTU2242	4	10	10	7	25	2	27	18	23	7	6	16	18	45	22	77	0	121	35	19	1	3	1	107	51	50	21	62	22	92	1	18	42	60	103	26	48	22	71	61	47	1	129	26	15	43	1	30	68
OTU225	32	5	27	40	36	1	15	26	21	11	10	0	10	0	93	5	41	0	68	2	0	24	23	40	0	0	22	0	17	0	3	0	32	0	0	28	45	155	0	0	0	0	97	36	12	31	46	57	0
OTU2257	7	0	5	6	0	26	5	6	12	0	0	0	0	0	0	0	0	0	0	0	0	37	0	0	0	0	0	0	0	0	0	0	0	0	0	0	0	0	0	0	2	0	0	0	55	0	36	0	0
OTU226	7	8	30	39	23	8	14	46	27	1	3	2	2	37	106	74	3	51	31	36	43	3	22	1	21	15	1	37	48	16	23	22	47	29	29	9	2	23	56	0	58	0	3	3	39	36	48	0	33
OTU22604	0	9	49	28	23	6	9	31	3	0	0	0	0	0	0	19	30	1	1	0	0	0	0	14	12	0	36	0	4	0	0	0	0	5	0	0	0	0	0	1	0	1	0	0	24	0	0	0	0
OTU227	5	2	5	0	2	6	27	6	0	0	0	17	7	13	69	78	31	32	0	26	2	28	1	1	52	26	93	0	18	21	0	65	0	71	83	0	25	32	51	66	0	44	40	16	46	18	24	0	65
OTU22773	0	1	0	0	0	0	0	0	0	9	0	0	14	0	0	3	0	37	0	0	0	0	0	17	23	2	1	0	20	0	7	0	0	0	0	1	0	0	0	0	0	0	0	0	0	0	0	41	31
OTU228	55	79	67	140	72	75	49	49	61	0	0	0	1	0	18	0	3	0	0	20	0	0	0	0	0	0	0	0	25	18	0	20	0	0	0	0	21	0	0	0	0	0	0	0	0	0	0	0	0
OTU2283	6	0	18	16	0	10	0	30	0	11	0	0	0	1	0	0	0	0	0	0	0	0	0	4	26	0	0	0	0	15	0	0	0	0	2	0	0	0	0	0	0	0	0	0	0	1	0	0	0
OTU229	45	28	19	34	4	46	8	28	25	11	2	2	0	1	36	18	65	70	90	5	61	51	24	12	139	28	56	36	18	85	29	13	49	85	2	10	32	141	2	97	22	22	152	1	69	0	21	5	0
OTU22979	72	55	125	61	94	76	74	67	84	34	33	5	50	0	38	32	18	3	176	115	23	56	48	92	3	54	61	7	21	66	0	1	2	0	39	45	55	56	59	0	49	3	62	201	32	100	163	0	0
OTU23	0	0	0	0	0	0	0	0	0	0	0	0	0	0	0	0	0	0	0	0	0	0	0	0	0	0	0	0	0	0	0	0	0	0	0	0	0	1	0	0	0	0	2	0	0	0	0	0	0
OTU230	166	85	198	66	143	120	132	172	171	15	0	7	1	50	25	1	14	173	46	10	50	25	0	0	0	0	0	0	19	9	22	0	140	0	0	60	37	62	0	78	0	94	0	1	0	0	70	0	0
OTU2300	0	0	0	0	5	0	0	5	0	1	0	2	0	1	0	0	0	0	70	0	0	0	0	0	0	0	0	18	0	0	0	31	0	0	0	0	0	23	0	0	0	0	0	16	0	0	9	48	0
OTU2306	0	0	0	0	0	0	0	0	11	0	0	0	0	0	1	0	0	39	0	0	0	0	0	0	0	29	0	0	0	0	26	0	0	0	0	0	0	40	1	43	0	0	0	0	0	2	0	63	0
OTU2307	0	0	5	5	0	0	0	0	0	0	0	0	0	0	2	0	2	0	0	0	0	19	0	0	2	24	23	27	0	0	37	0	0	0	0	0	18	0	0	51	38	1	0	0	0	0	20	10	44
OTU231	0	0	5	1	0	16	0	2	0	0	7	13	10	28	0	0	0	0	99	0	70	0	0	56	15	33	0	50	14	0	53	0	18	1	0	70	3	14	33	0	0	16	0	53	13	0	15	52	0
OTU23153	12	1	0	36	3	10	0	0	0	0	0	0	0	1	0	24	34	0	0	0	0	0	0	43	0	0	1	30	7	14	0	0	0	0	0	0	0	0	0	0	1	0	0	1	0	0	0	0	0
OTU2317	0	4	19	13	7	0	0	18	32	6	0	15	0	2	2	0	43	0	1	0	2	0	1	1	1	1	0	37	1	1	19	0	52	0	2	2	0	0	0	1	0	22	0	0	0	0	33	106	0
OTU2319	1	12	21	5	4	21	4	0	16	0	0	4	0	0	0	1	0	0	26	29	0	0	0	0	26	0	53	0	8	106	0	0	0	0	2	0	0	33	0	0	0	1	0	2	68	0	0	0	0
OTU232	17	26	21	13	34	9	1	13	4	0	0	8	19	56	22	7	18	29	28	71	52	57	3	30	5	0	65	3	12	24	3	96	142	155	48	12	0	21	62	84	4	11	66	1	9	39	82	0	0
OTU2328	0	0	0	0	0	0	5	0	0	5	0	2	0	0	0	0	0	0	24	0	0	0	0	13	0	1	0	20	0	28	0	30	0	0	0	0	2	19	15	0	0	15	0	0	0	0	0	0	15
OTU233	103	83	77	59	33	43	64	97	75	4	11	1	2	62	39	5	51	5	4	6	5	20	28	8	47	8	9	5	45	88	29	39	87	72	2	27	70	36	4	40	52	2	118	25	34	1	31	125	3
OTU2330	0	13	0	0	0	7	1	39	11	1	0	0	0	0	0	29	1	1	0	0	1	52	0	0	0	28	8	1	21	0	0	0	0	0	2	0	0	0	0	1	0	0	0	0	22	0	0	0	0
OTU2333	0	0	0	0	0	0	0	11	0	16	0	0	0	0	0	0	0	0	0	43	0	0	1	59	36	0	1	0	12	0	1	0	0	1	66	0	0	0	1	0	0	0	52	0	0	0	0	0	0
OTU23338	9	15	6	7	6	9	25	25	72	0	0	0	0	45	0	0	0	0	0	0	0	0	0	0	0	0	0	0	0	0	0	0	0	0	0	0	0	0	0	0	0	0	0	0	0	0	0	0	0
OTU2334	7	5	5	14	6	21	0	5	3	0	0	0	0	0	0	1	0	0	0	0	0	0	7	0	0	0	58	0	11	0	0	0	24	58	0	0	58	0	0	0	0	0	13	73	42	0	19	0	0
OTU234	0	0	0	0	39	8	0	0	0	0	21	1	19	1	0	71	129	0	8	0	0	0	15	26	0	0	0	0	28	14	58	0	1	89	0	0	34	2	0	0	0	0	18	0	0	52	0	55	17
OTU23472	0	15	4	1	11	10	35	0	0	2	0	8	3	13	44	65	22	0	0	57	24	22	0	0	27	34	29	74	16	11	21	35	78	0	107	19	12	0	27	1	0	39	1	6	2	22	0	51	0
OTU235	50	27	33	25	51	64	51	48	32	22	0	48	16	55	45	3	53	21	29	25	5	94	37	84	37	7	6	25	30	78	67	58	1	39	3	2	27	49	79	74	3	12	51	4	28	78	52	39	155
OTU23586	0	36	12	34	11	6	23	4	20	3	1	2	0	0	8	0	17	0	0	0	0	25	13	1	1	0	0	0	0	14	0	0	0	0	0	0	0	19	0	0	0	0	0	0	27	2	0	0	0
OTU236	36	12	46	57	40	35	28	4	19	0	0	0	0	0	32	0	0	0	59	0	16	6	0	1	0	1	0	0	0	0	0	0	0	0	0	0	43	0	52	0	0	0	0	1	0	0	0	0	0
OTU2361	0	1	0	0	0	0	0	9	4	0	0	0	0	0	0	1	0	0	0	0	0	14	0	0	0	0	0	0	0	0	0	0	0	0	0	0	0	0	1	0	0	0	0	0	0	0	0	0	0
OTU2362	0	11	11	8	11	0	0	0	10	0	0	0	0	0	0	77	0	0	0	0	0	1	0	0	0	0	1	0	0	1	0	62	0	0	0	0	0	0	1	0	0	1	1	19	13	0	0	0	40
OTU237	12	12	0	24	1	5	1	13	1	13	0	0	1	3	0	38	31	1	11	63	16	0	7	0	1	0	2	55	51	0	0	0	2	73	0	0	0	71	0	1	47	0	38	0	40	66	5	0	27
OTU238	13	29	14	6	14	13	10	18	14	34	2	1	0	40	43	46	44	102	151	15	66	5	41	47	1	13	24	191	54	56	11	75	52	30	81	7	5	19	111	25	2	6	50	7	51	24	33	79	47
OTU23865	0	1	2	1	3	0	0	6	11	0	0	2	9	5	2	0	23	1	0	0	38	11	13	0	0	1	0	1	6	0	0	0	0	1	0	1	0	0	0	0	1	0	0	65	0	0	0	40	0
OTU239	0	22	2	13	0	12	20	15	17	0	0	0	11	16	1	0	65	0	0	27	49	15	0	39	0	0	3	0	0	41	28	1	0	58	0	0	32	1	62	46	70	0	0	0	0	19	0	20	1
OTU2391	7	0	0	0	11	1	0	1	1	0	0	0	0	41	30	0	0	0	41	0	0	1	1	0	0	0	83	1	0	0	3	1	2	0	71	0	1	0	0	0	0	0	0	0	37	24	0	0	0
OTU2395	0	0	0	0	0	15	0	0	0	0	0	0	0	0	0	0	0	0	22	0	0	25	0	0	0	0	0	0	2	0	20	0	0	0	0	0	0	17	0	0	0	13	17	0	0	0	0	41	0
OTU2396	12	17	13	0	9	1	0	7	2	0	7	0	1	0	2	0	22	0	33	1	0	0	32	2	3	1	0	31	10	0	0	2	1	4	0	64	0	0	0	24	33	0	42	1	0	0	0	0	24
OTU24	567	594	627	603	714	606	475	547	673	190	176	91	277	619	414	572	194	398	465	699	280	235	560	732	502	304	724	950	1131	351	535	707	565	660	607	869	508	567	631	823	437	281	437	768	515	929	1165	415	401
OTU240	0	6	13	0	0	14	0	8	5	6	11	5	11	0	18	0	0	0	0	29	3	0	26	53	19	11	0	0	1	0	0	113	1	0	0	0	0	0	0	0	0	0	20	0	1	1	0	1	0
OTU241	28	9	15	40	11	1	4	10	17	0	0	13	0	50	49	0	0	0	0	76	0	41	17	29	0	31	48	139	4	0	0	44	55	0	0	0	0	140	0	35	21	32	66	1	86	27	188	0	0
OTU2412	10	23	10	11	1	0	12	21	11	0	0	0	0	1	0	0	1	0	0	0	0	0	14	0	0	11	0	0	12	0	0	0	0	0	0	0	0	0	0	0	0	0	0	0	0	0	0	0	0
OTU2413	1	0	9	0	40	18	1	0	0	10	0	0	0	71	1	27	21	40	52	1	0	0	0	8	0	0	1	0	0	0	1	0	0	0	42	2	0	0	16	0	1	27	0	1	0	0	0	37	0
OTU242	14	14	3	0	5	6	0	1	16	1	0	1	2	16	1	1	49	0	1	20	1	0	0	0	0	2	0	0	9	27	0	29	52	1	61	41	0	4	0	0	26	0	49	39	67	20	39	0	0
OTU2429	0	16	0	2	0	5	9	0	0	7	1	0	0	0	1	56	1	0	25	2	2	0	0	0	0	58	71	0	7	43	0	24	3	32	0	0	23	0	26	0	52	0	0	0	24	35	0	0	0
OTU243	22	28	39	15	63	38	7	66	67	0	0	0	2	0	1	1	1	15	0	30	5	0	0	0	0	0	10	0	7	0	0	0	0	0	0	0	0	5	69	25	2	1	27	1	1	0	2	0	24
OTU244	47	67	22	20	5	17	26	59	3	1	27	1	7	66	2	1	145	1	25	65	51	0	51	55	1	22	30	40	38	0	0	114	0	125	23	28	40	35	0	66	32	17	1	41	5	5	37	118	0
OTU2441	36	5	24	9	22	28	8	30	3	0	0	0	2	0	0	0	0	1	0	0	0	0	23	0	3	1	21	1	0	0	0	1	0	0	0	0	0	0	0	0	0	0	0	0	0	0	0	0	0
OTU2443	27	9	15	13	7	19	9	18	19	0	0	17	1	1	52	22	38	2	18	31	1	18	22	25	2	5	2	1	1	6	2	18	0	1	1	5	0	51	1	9	2	0	3	12	1	50	0	80	3
OTU2449	1	28	18	1	2	0	4	2	1	0	1	0	1	2	31	1	3	3	1	0	32	0	1	1	0	0	18	0	1	31	0	25	1	1	2	0	0	2	1	0	0	17	0	0	99	0	0	0	0
OTU245	116	70	36	103	116	71	129	61	76	1	2	0	0	0	0	0	0	0	30	2	0	22	4	18	0	16	0	1	0	11	0	29	0	1	1	0	9	0	0	0	89	0	1	0	0	21	0	0	0
OTU2458	8	0	0	0	8	0	7	0	26	0	0	0	8	1	0	1	0	1	0	0	1	0	1	0	0	12	0	0	6	0	0	0	30	1	0	0	2	0	0	1	152	0	0	0	0	21	0	0	0
OTU246	55	27	30	13	55	19	37	48	5	0	0	0	0	0	0	0	0	0	0	0	0	0	0	0	0	0	0	0	0	0	0	0	0	0	1	0	0	0	0	0	0	0	0	0	0	0	0	0	0
OTU2461	42	31	10	38	35	51	32	10	14	0	0	0	1	13	0	24	1	0	0	0	15	17	0	0	57	0	99	0	5	0	0	0	0	0	0	0	1	0	23	1	1	1	69	32	6	1	38	28	0
OTU247	49	23	18	11	34	14	5	23	5	34	0	0	7	0	0	0	0	0	2	28	1	0	2	17	0	0	43	26	6	22	62	0	0	0	0	25	0	0	0	0	1	5	0	52	0	0	0	32	0
OTU2470	0	7	0	0	0	6	0	2	0	0	0	0	0	0	0	7	0	0	0	0	0	0	0	0	1	0	0	8	0	0	1	0	0	0	0	0	0	14	0	0	0	0	0	0	0	0	0	0	0
OTU2473	0	1	0	0	0	0	0	1	0	0	3	0	0	0	0	0	0	1	1	0	2	4	9	15	1	1	1	0	4	1	3	0	1	0	38	2	21	1	0	0	0	0	0	0	0	20	121	109	0
OTU248	38	38	25	7	27	30	5	12	0	12	3	1	1	1	82	10	4	12	5	63	2	5	28	8	25	5	16	4	32	27	66	45	3	41	26	35	0	7	3	4	2	23	19	45	4	0	6	114	31
OTU24899	50	94	94	81	69	100	67	57	88	1	0	1	0	0	2	2	2	0	0	3	0	0	0	3	1	0	0	1	0	0	1	0	1	0	0	11	0	0	0	0	0	0	0	2	1	0	0	0	0
OTU249	0	2	1	6	0	0	0	0	0	0	0	6	0	1	14	0	19	0	16	0	10	0	0	0	2	8	11	0	22	4	18	0	0	17	0	34	41	20	0	0	16	3	40	16	18	28	9	0	30
OTU2492	6	0	14	5	8	16	0	0	1	0	43	0	21	1	0	0	1	1	0	54	0	42	0	25	0	39	21	0	15	15	32	1	23	0	84	0	58	17	59	0	0	18	59	21	35	0	28	1	115
OTU25	18	2717	11	10	20	29	15	8	23	4	8	6	0	28	49	10	30	17	0	25	25	0	22	1	0	1	6	26	0	5	0	64	0	47	31	20	0	101	0	1	28	917	44	27	1	59	0	48	33
OTU250	14	25	21	45	48	60	19	29	9	0	8	3	0	2	11	0	0	0	1	0	42	52	44	35	0	12	1	0	44	29	1	14	25	1	1	24	1	0	0	35	0	12	33	0	20	50	0	0	0
OTU25015	1	0	0	2	0	0	0	2	9	0	0	0	0	2	0	0	0	0	0	3	0	0	1	0	32	0	0	0	0	51	0	0	44	1	2	0	0	0	24	1	38	0	0	1	41	0	0	11	0
OTU2504	17	0	0	0	20	0	2	1	0	14	0	0	1	48	5	55	1	23	0	82	1	0	0	0	1	2	0	3	0	13	0	1	1	2	29	29	0	0	0	101	0	2	2	1	15	0	0	0	61
OTU251	47	2	5	6	17	4	8	24	10	0	0	20	12	0	1	40	57	39	45	2	12	2	1	2	1	0	1	44	14	0	0	138	19	0	79	33	0	0	54	50	25	3	30	0	22	0	22	0	35
OTU252	0	2	0	0	3	0	0	0	9	0	10	3	12	8	5	45	64	0	27	23	7	13	1	27	18	18	57	30	3	38	0	31	0	3	58	0	71	5	45	0	48	39	0	26	8	111	37	103	28
OTU2524	12	1	0	0	0	0	15	22	11	0	0	0	0	0	0	48	0	0	0	0	0	0	0	34	0	33	0	0	6	0	0	0	0	24	69	0	33	0	69	89	47	0	0	0	0	59	0	39	0
OTU2528	0	8	0	0	7	9	0	12	0	0	0	0	0	44	1	0	0	0	0	1	0	0	0	1	0	0	1	0	0	0	0	0	0	0	0	0	0	27	0	0	35	1	27	0	1	0	0	1	33
OTU2529	2	16	0	0	15	1	1	0	5	0	0	0	0	0	0	33	93	23	0	0	0	0	0	0	33	0	70	0	0	33	35	68	52	43	1	0	10	0	33	0	0	0	0	0	36	0	0	31	12
OTU253	15	1	4	7	8	5	0	0	0	0	18	3	0	1	26	0	0	25	94	0	0	18	24	6	79	0	67	0	25	23	2	65	35	0	0	0	55	108	22	95	76	0	0	1	6	22	1	53	0
OTU25316	1	0	0	3	0	0	0	0	0	0	0	0	0	1	0	0	0	84	1	1	0	0	2	0	0	2	0	0	10	0	39	0	0	30	0	1	0	0	34	0	30	0	0	0	17	29	0	0	0
OTU25320	9	5	14	10	0	0	8	10	16	3	0	1	0	0	0	0	0	0	64	0	0	15	0	0	0	0	24	0	0	0	29	0	0	0	1	0	41	0	0	2	0	1	0	0	0	0	0	0	0
OTU2538	0	20	17	12	8	0	0	29	0	22	0	0	1	18	1	4	16	4	1	35	68	33	8	30	1	0	79	1	25	24	0	46	0	45	1	37	33	0	63	0	0	19	0	0	0	0	5	24	0
OTU254	13	4	7	3	0	0	6	1	19	1	6	3	0	0	43	0	14	63	0	23	11	0	0	14	56	16	0	0	7	13	0	37	1	0	0	14	71	0	26	28	0	0	0	0	7	0	0	0	0
OTU2548	3	1	10	0	0	3	19	1	0	19	0	21	0	1	0	9	10	0	0	42	30	0	0	18	0	1	28	0	6	1	0	0	5	0	0	31	0	0	0	30	9	25	0	19	38	0	0	0	18
OTU255	69	63	17	56	80	59	74	74	88	3	2	2	1	53	2	0	0	0	0	1	1	0	0	0	0	0	0	0	0	1	0	0	0	2	0	1	0	0	0	0	0	1	1	1	1	0	0	0	0
OTU2552	5	0	0	0	10	0	0	0	0	0	0	1	0	0	0	0	17	18	0	0	0	0	17	0	0	1	0	0	0	16	0	0	0	41	0	0	0	0	41	25	1	0	1	0	26	0	25	29	2
OTU25520	63	0	4	18	25	21	21	0	6	5	0	0	12	24	0	1	0	1	1	0	72	15	0	0	0	15	0	0	0	14	0	0	3	0	0	0	27	114	0	0	63	0	0	0	10	0	0	0	44
OTU2554	0	0	0	30	0	0	0	0	0	0	0	0	0	0	0	0	0	0	0	0	12	0	0	0	0	0	0	0	7	43	0	125	0	0	0	0	0	0	0	0	0	0	1	0	0	0	0	0	0
OTU256	9	11	3	9	20	3	7	7	9	0	5	0	1	5	20	16	8	16	15	3	20	37	5	5	6	9	0	38	30	41	32	13	60	49	4	1	12	50	24	19	4	0	0	5	12	30	17	14	26
OTU2567	10	0	0	5	0	0	9	8	7	0	0	0	0	0	0	0	0	0	0	0	0	0	0	0	0	0	0	0	0	0	0	16	0	1	53	0	0	30	0	0	0	3	0	0	0	0	0	0	0
OTU257	5	8	8	1	9	0	35	9	0	5	0	13	5	25	0	21	43	21	0	20	29	24	1	45	1	0	109	15	9	14	0	3	100	41	0	58	93	3	64	0	1	1	0	3	0	58	0	38	38
OTU25706	0	0	5	1	0	0	8	0	0	0	16	0	0	0	0	0	0	0	0	0	0	0	18	22	0	0	0	0	5	0	0	0	0	0	0	0	0	0	42	0	0	1	0	24	0	0	27	0	0
OTU258	20	38	35	31	26	30	46	4	11	17	1	7	49	1	1	0	1	45	2	1	2	22	2	3	2	3	47	2	18	3	39	32	3	16	2	2	1	1	0	0	0	1	3	0	20	55	1	49	22
OTU25863	13	19	10	9	1	0	5	0	6	0	14	0	10	3	1	89	0	16	0	0	18	0	26	0	0	0	5	18	3	0	1	0	37	55	0	0	0	0	0	1	0	0	41	0	0	0	0	0	0
OTU259	32	41	19	65	84	56	31	25	22	7	0	7	0	0	2	2	41	0	0	33	53	18	0	21	70	31	36	0	16	90	75	32	1	0	25	113	0	33	0	49	0	22	1	1	19	1	33	48	60
OTU25904	2	12	7	10	14	7	0	22	16	0	0	0	0	0	0	68	0	33	0	0	1	0	14	0	21	0	0	0	1	0	7	0	0	0	0	0	0	0	0	0	0	0	0	0	1	0	30	0	28
OTU2597	0	11	0	0	3	7	1	0	8	0	0	0	1	0	0	0	0	0	35	1	6	0	2	1	0	0	0	0	12	15	1	1	20	2	1	0	46	0	113	0	0	0	0	29	0	3	54	0	0
OTU2599	11	70	26	25	18	30	33	22	3	14	0	4	0	0	60	5	0	0	31	1	0	0	0	0	0	38	0	0	6	15	38	64	46	5	0	0	0	82	0	47	2	47	34	1	8	0	152	29	99
OTU26	174	205	174	222	157	131	80	161	178	96	33	12	12	129	89	115	149	225	159	312	109	119	112	136	88	118	191	153	101	91	188	235	293	273	170	99	182	225	334	185	265	216	141	167	161	191	171	174	142
OTU260	20	1	4	7	13	0	13	2	7	0	17	12	21	23	42	2	76	82	59	84	31	28	82	36	61	2	47	59	1	40	62	3	4	54	50	33	1	4	136	51	58	8	1	30	18	15	0	1	22
OTU2603	0	1	2	4	8	9	2	0	14	0	0	0	0	2	1	0	30	0	55	0	1	2	1	32	0	5	0	89	11	0	2	0	0	52	0	0	0	0	94	73	0	1	0	143	37	0	0	0	0
OTU26068	0	0	0	0	0	0	0	2	0	0	0	0	0	2	0	1	0	1	1	0	18	0	1	0	1	0	0	0	0	0	0	0	0	41	0	0	0	0	0	2	0	1	0	0	0	0	21	0	0
OTU26083	26	7	23	7	4	0	7	10	8	0	14	0	0	58	0	37	0	3	1	1	2	25	0	29	1	6	0	0	46	0	2	0	0	14	21	0	18	0	1	1	0	11	1	0	0	0	22	0	0
OTU2609	0	0	0	0	0	1	0	0	0	0	0	0	1	0	0	0	0	1	0	17	19	0	1	0	0	0	0	44	12	0	0	0	0	0	0	0	0	0	0	0	1	0	2	0	2	0	0	60	0
OTU261	23	0	29	20	11	18	18	10	28	0	0	0	0	0	0	0	0	0	0	0	2	24	0	930	1	0	0	1	4	0	0	1	0	0	1	0	0	0	0	0	1	0	43	0	0	0	0	0	0
OTU26120	21	0	0	0	0	0	11	0	0	0	0	0	26	0	26	2	1	0	12	0	26	0	0	0	0	1	0	69	45	0	29	66	0	0	0	1	0	0	0	0	0	0	70	1	0	45	0	0	0
OTU2616	16	11	46	8	15	23	37	32	27	0	0	0	0	0	0	0	0	0	0	0	0	0	0	0	0	0	0	0	0	0	0	0	0	0	0	0	0	0	0	0	0	0	0	0	0	0	0	0	0
OTU262	0	0	1	0	7	2	1	1	2	11	4	5	0	0	15	46	2	10	18	41	0	21	0	18	0	5	0	0	22	0	2	34	18	1	62	6	0	47	15	91	27	12	22	15	29	60	12	16	0
OTU2620	4	6	18	10	27	26	7	13	20	12	22	0	17	11	65	2	1	0	0	4	0	0	1	17	0	0	16	0	0	12	0	0	0	0	26	31	0	1	41	0	0	0	0	0	21	28	0	14	51
OTU26256	0	0	0	0	4	8	0	0	4	10	0	5	1	0	1	19	2	0	0	0	1	0	1	0	0	0	0	40	20	0	0	0	1	0	0	1	0	0	0	0	0	0	0	0	0	0	0	0	0
OTU263	32	33	10	12	15	52	0	15	15	14	0	8	0	22	13	42	0	37	0	20	0	14	20	0	36	1	1	44	14	34	1	64	0	1	0	43	1	30	63	0	24	21	74	55	38	12	45	18	0
OTU2630	1	16	19	4	10	5	9	21	15	15	0	0	4	2	15	2	0	0	10	0	41	14	1	79	49	28	3	2	33	17	0	38	35	1	46	1	2	0	1	1	0	2	0	15	26	76	0	0	27
OTU2631	14	0	16	1	19	9	0	2	30	0	0	0	0	0	0	0	5	89	0	0	1	2	10	97	1	0	25	65	7	31	0	0	2	0	0	0	0	5	52	0	3	5	74	3	2	4	0	0	1
OTU2634	0	0	0	1	0	7	0	0	0	0	0	0	0	0	0	30	1	38	32	9	0	0	0	0	0	0	36	0	0	0	0	0	0	0	1	0	0	0	0	90	1	1	0	0	18	0	0	47	0
OTU264	1	15	10	0	9	6	7	18	9	13	1	8	23	132	20	20	2	0	20	18	35	88	42	78	22	53	153	15	55	184	148	0	0	48	39	39	92	61	0	82	134	0	0	78	155	53	35	13	0
OTU265	31	4	27	3	3	16	4	12	17	13	0	11	5	57	0	36	0	30	128	95	56	5	28	79	91	25	69	73	42	4	1	37	40	1	0	117	14	2	67	59	6	31	18	25	32	0	41	74	29
OTU2653	0	0	13	19	0	2	0	0	0	0	0	0	0	0	0	0	0	0	93	2	0	25	0	0	0	0	0	0	13	1	0	0	0	0	0	0	0	0	35	1	0	0	0	0	1	0	0	0	0
OTU2658	0	0	0	3	0	13	6	0	3	0	0	1	0	0	0	0	0	0	23	0	0	0	0	0	0	0	58	44	3	0	2	49	0	0	0	16	0	0	21	0	0	7	0	0	0	0	51	49	0
OTU266	17	3	12	19	44	22	21	30	13	19	5	0	31	8	14	16	4	52	18	8	6	40	3	51	32	4	3	32	10	62	0	18	6	1	31	66	27	29	1	5	40	23	42	25	17	53	66	27	30
OTU2669	0	0	0	0	0	0	0	0	0	0	6	0	0	0	17	0	5	0	0	63	0	0	0	0	58	21	0	34	30	0	58	0	0	0	0	0	0	38	0	0	19	0	32	0	0	1	0	26	2
OTU267	0	0	11	27	0	8	0	2	0	0	0	1	7	0	6	0	0	0	38	0	22	0	0	71	0	0	34	0	0	8	0	45	29	3	0	0	0	0	84	150	0	14	2	22	17	0	1	0	63
OTU26758	24	0	19	0	18	8	7	0	0	0	0	13	0	0	0	32	21	0	30	0	0	31	18	1	0	50	91	0	23	1	0	0	0	40	48	0	0	0	35	0	0	0	0	0	0	0	38	0	1
OTU268	18	6	21	45	23	19	3	0	9	0	0	8	0	0	0	0	0	1	0	0	11	0	0	0	19	0	0	0	5	0	47	79	23	0	50	0	0	0	0	1	32	0	0	0	0	0	0	25	0
OTU2687	0	0	0	0	6	2	0	0	0	0	14	0	5	0	0	0	0	0	34	33	88	17	0	0	0	0	0	0	0	0	0	0	0	0	0	35	0	0	0	0	0	11	0	0	0	0	0	0	0
OTU269	27	23	3	15	9	78	13	46	13	25	0	1	7	1	1	57	28	0	0	27	17	0	0	0	0	0	0	0	79	15	57	48	20	0	0	0	0	49	0	0	1	0	33	1	0	68	2	95	87
OTU26958	4	0	22	25	19	3	5	25	16	1	0	0	0	1	1	1	5	0	1	0	0	0	38	0	24	1	1	0	21	39	0	13	0	0	0	1	0	0	0	0	1	0	0	0	64	1	0	55	1
OTU26970	0	0	0	6	0	0	0	0	0	0	0	0	0	0	1	1	0	0	0	0	0	0	0	0	0	0	0	0	15	0	0	0	0	0	54	0	0	0	115	1	72	0	0	1	1	0	0	0	37
OTU27	152	227	122	162	156	212	120	108	193	72	71	75	32	103	96	222	277	141	144	263	137	136	121	129	122	157	371	212	192	48	196	346	253	248	107	160	364	183	231	160	150	134	181	156	320	20	204	137	153
OTU270	17	2	22	10	6	16	9	1	1	16	19	2	0	0	33	68	57	2	4	24	69	59	19	44	16	22	3	2	3	97	35	169	143	52	48	43	2	124	72	41	45	6	47	2	27	27	10	60	1
OTU2703	25	0	0	0	0	0	1	7	8	8	1	0	1	0	0	1	1	4	0	0	0	1	0	30	0	0	1	0	30	0	0	0	34	0	0	0	1	0	0	39	0	2	0	0	0	1	0	0	0
OTU27032	10	7	0	0	9	0	3	2	0	6	0	0	0	2	0	2	0	3	1	0	1	2	0	1	10	0	2	12	25	19	1	0	1	31	2	0	0	0	0	7	0	24	31	1	0	0	0	23	0
OTU2704	0	4	0	13	0	17	0	35	0	0	0	0	0	0	0	0	0	0	0	0	0	0	0	0	0	0	0	0	0	12	0	0	0	0	0	0	0	0	0	0	0	0	0	0	0	0	0	0	0
OTU271	8	0	0	0	4	0	0	0	0	6	0	0	0	78	22	0	69	18	6	0	20	28	0	0	14	8	24	89	0	0	2	33	106	0	3	0	1	23	0	38	64	0	0	30	1	21	11	41	38
OTU27115	0	2	0	0	0	19	0	0	13	0	0	0	15	0	1	0	0	0	0	0	0	0	0	0	0	0	0	0	0	0	0	0	40	0	0	0	0	29	0	1	0	0	0	0	0	23	0	56	25
OTU27169	0	0	6	0	0	0	0	3	0	14	0	14	0	0	0	0	0	0	60	0	2	0	0	0	19	26	0	96	0	0	67	0	0	0	68	0	0	48	23	107	0	19	0	0	0	0	0	0	0
OTU272	0	0	11	0	4	24	9	12	2	0	0	17	20	0	41	0	60	39	0	0	34	0	0	0	41	0	77	67	14	0	45	0	59	0	71	0	0	72	0	1	0	45	0	0	0	0	0	66	36
OTU2725	0	0	0	0	0	0	0	0	0	0	0	0	0	0	23	0	23	28	0	0	0	0	30	0	18	0	0	0	0	0	0	0	0	0	34	0	0	0	0	63	0	0	0	0	0	0	0	0	22
OTU273	65	43	34	62	18	10	19	46	30	0	0	0	0	28	0	0	0	35	0	28	0	1	0	0	0	0	6	0	0	0	0	0	0	0	0	0	0	0	0	0	0	0	0	0	0	0	0	30	0
OTU27374	0	0	4	19	0	0	0	0	13	13	0	0	0	1	50	0	0	0	0	0	0	0	0	0	0	0	0	0	0	0	0	4	0	0	72	34	0	0	0	0	0	0	0	43	50	0	0	0	7
OTU274	50	16	89	53	39	13	8	27	8	13	9	0	0	32	24	7	0	16	0	2	29	18	1	0	0	0	69	0	1	0	18	16	0	0	0	0	23	0	37	30	67	18	1	0	0	4	0	0	0
OTU27409	0	3	8	34	8	4	0	7	5	3	0	2	0	0	0	0	14	0	0	0	24	0	0	0	0	19	0	0	28	0	1	0	63	0	39	0	1	33	46	0	8	43	0	1	1	0	0	0	0
OTU27477	0	0	0	0	0	7	0	0	7	0	0	6	0	5	0	1	0	3	0	1	1	25	0	1	0	0	113	0	0	0	0	0	1	44	1	0	0	0	0	0	59	0	0	0	0	42	0	0	0
OTU275	18	44	38	15	77	48	25	45	31	2	9	7	12	27	58	39	5	49	106	2	19	49	2	41	65	14	71	7	42	72	1	14	67	79	70	48	1	46	2	23	33	3	41	89	41	2	43	42	48
OTU2750	44	0	7	30	20	14	4	8	6	0	0	1	0	0	0	0	0	0	0	0	0	0	0	0	0	0	0	0	0	0	0	0	0	0	0	0	0	0	0	0	0	0	0	0	0	0	0	0	0
OTU27512	0	0	0	0	0	0	0	0	0	2	1	6	3	0	0	0	0	0	23	16	0	13	0	0	27	14	63	0	0	22	37	31	0	0	8	0	0	1	23	67	1	1	0	0	0	36	0	23	0
OTU27514	0	0	0	1	0	0	9	0	0	0	0	0	21	0	0	0	0	0	0	0	0	0	0	48	0	0	2	0	0	0	52	0	0	0	25	0	0	0	0	0	42	0	0	7	0	0	0	0	0
OTU276	2	17	21	0	0	18	2	4	3	35	1	0	18	39	13	0	3	3	1	0	2	0	2	3	2	30	1	2	6	33	0	3	1	61	39	42	0	0	0	135	1	13	57	0	55	38	22	2	47
OTU277	97	41	27	78	77	145	118	61	115	10	3	21	0	38	41	24	38	56	0	38	0	4	15	93	1	25	59	70	97	0	57	0	119	28	0	15	54	42	0	73	118	86	63	134	208	27	0	2	2
OTU2779	13	23	11	5	0	2	14	14	0	0	0	7	0	0	0	27	0	0	0	0	27	64	0	0	0	0	0	0	0	51	21	0	0	0	0	1	0	0	0	0	0	0	0	0	16	2	0	0	0
OTU27793	39	34	22	47	39	38	14	16	38	0	0	1	0	0	0	2	0	0	0	0	30	2	12	0	0	0	0	0	0	0	1	0	0	0	0	0	0	46	0	0	0	0	0	0	0	0	22	6	0
OTU278	19	17	7	32	10	54	32	0	25	3	0	1	14	2	8	26	9	97	31	15	0	1	39	1	72	3	33	14	99	0	27	40	50	25	55	28	0	163	5	99	2	15	22	0	0	50	81	11	43
OTU2780	24	10	27	3	12	0	4	0	25	0	0	0	2	0	1	2	1	0	0	0	0	0	0	0	0	0	0	0	0	0	0	0	0	0	0	0	0	0	0	0	0	0	0	1	0	0	0	0	0
OTU2789	6	13	0	5	10	22	4	9	20	0	12	0	0	1	16	19	1	24	0	1	0	0	1	2	45	0	1	1	33	0	8	0	2	25	59	0	28	5	0	0	0	56	5	0	28	2	0	0	0
OTU279	2	6	22	62	39	44	8	10	26	0	29	1	14	23	29	67	1	0	20	4	45	22	10	55	0	3	10	3	13	0	50	129	0	86	1	0	0	67	0	28	1	33	88	0	69	1	94	0	45
OTU2794	36	8	11	0	0	10	0	7	8	0	0	0	5	0	14	0	12	0	0	3	0	0	13	0	26	7	0	0	0	31	1	28	0	0	0	42	0	0	0	34	0	0	0	0	0	0	0	0	0
OTU27940	89	55	82	120	71	84	59	74	62	0	1	1	0	32	18	16	0	0	0	4	27	37	28	0	0	15	0	104	12	1	0	83	1	36	0	1	0	0	0	16	6	0	0	0	64	40	2	0	0
OTU27952	106	75	162	101	127	109	17	100	97	0	18	2	0	1	0	86	13	43	75	190	119	24	23	4	28	2	92	128	8	0	209	0	95	28	118	96	93	61	53	123	150	340	64	17	59	0	20	0	57
OTU27956	0	0	14	12	0	0	0	0	22	3	0	3	0	0	13	0	0	6	0	28	0	2	0	0	1	0	23	19	2	1	0	0	0	5	0	36	27	3	25	0	35	0	28	0	0	21	0	0	0
OTU27984	0	0	0	0	0	0	0	0	0	0	0	0	0	0	0	1	117	1	0	0	0	0	0	63	0	0	0	0	42	0	0	1	0	1	0	0	0	0	0	0	0	0	0	14	22	26	40	0	0
OTU27999	3	13	3	2	4	3	2	0	4	0	4	4	0	29	5	2	19	0	1	0	0	0	92	9	52	15	0	0	12	7	1	0	1	1	1	22	20	0	0	36	1	0	26	53	0	2	1	147	53
OTU28	125	166	134	91	112	111	67	81	145	40	23	42	20	42	50	96	117	414	146	25	214	98	73	52	87	156	36	216	41	235	35	233	101	92	337	54	126	196	24	96	435	26	83	97	104	192	119	230	110
OTU280	1	0	0	7	14	10	4	33	10	0	6	0	0	0	0	0	33	23	0	0	30	0	18	0	0	18	0	0	13	0	80	0	0	74	0	0	0	0	86	0	46	0	0	0	42	88	93	0	0
OTU2800	0	0	7	0	0	0	0	19	5	0	27	0	0	0	35	0	1	0	0	1	0	0	0	0	16	8	0	0	0	0	0	0	0	34	0	0	0	37	0	1	89	0	0	0	14	0	36	53	0
OTU2801	0	0	0	0	0	13	0	0	0	0	0	16	0	2	0	0	0	94	0	0	0	0	0	25	23	0	4	0	3	32	0	0	0	0	0	0	0	28	0	0	0	0	0	0	0	0	0	0	0
OTU2803	0	3	7	0	0	0	3	0	0	10	0	0	0	0	0	31	2	2	0	1	0	0	0	25	0	0	0	71	0	2	0	1	1	0	1	0	1	2	0	0	0	1	1	1	26	0	0	0	0
OTU2807	0	0	0	1	0	4	0	0	0	17	0	0	0	0	0	0	0	0	40	0	26	0	0	0	0	0	0	1	0	38	0	0	0	0	41	1	0	0	0	0	0	0	0	0	0	60	0	1	0
OTU281	16	45	63	11	40	0	16	0	47	0	2	2	0	0	1	0	1	0	1	0	0	0	0	1	1	0	0	0	0	0	0	0	0	0	0	0	0	0	0	0	0	0	0	0	0	0	0	0	0
OTU28131	27	17	7	29	11	14	8	27	22	1	0	0	1	10	6	5	0	0	0	13	0	71	0	91	26	1	0	0	0	66	26	19	0	42	0	0	0	2	0	0	68	9	93	0	8	0	0	0	97
OTU28159	0	0	9	0	20	0	0	0	2	0	3	3	0	0	0	0	0	0	0	0	0	0	0	0	0	0	6	0	4	0	1	17	0	0	15	20	26	0	0	16	24	8	0	15	0	0	0	17	0
OTU282	8	0	8	0	0	9	13	1	6	2	0	3	27	1	42	1	20	18	0	41	51	0	1	20	22	0	0	1	1	25	0	53	54	0	0	0	33	50	26	1	0	0	0	2	25	0	0	0	0
OTU2820	0	8	11	11	0	12	0	16	6	5	0	2	0	0	0	0	0	0	19	0	0	15	0	0	0	0	0	27	0	0	1	22	0	0	15	1	0	0	0	0	0	14	16	0	0	0	0	0	0
OTU28225	0	0	0	0	0	0	0	0	0	0	0	0	0	0	1	19	0	0	0	0	0	0	0	29	1	11	0	0	12	0	0	0	0	0	71	1	0	31	0	33	0	0	0	0	0	0	0	0	0
OTU283	11	0	0	5	14	2	4	15	21	0	16	9	12	1	2	2	2	2	75	1	2	1	5	1	1	0	0	0	18	0	130	0	1	31	118	114	1	2	62	2	0	39	2	2	18	69	1	87	0
OTU28330	0	0	0	0	0	10	15	1	9	0	0	0	0	0	0	0	0	0	0	0	0	0	0	0	0	1	0	30	9	0	0	0	54	0	0	0	0	0	147	0	0	0	0	50	23	0	0	58	0
OTU28333	0	0	0	0	0	0	0	0	0	0	0	0	0	0	0	0	0	1	0	22	0	0	0	0	0	36	0	0	0	0	0	0	0	0	55	0	0	0	56	0	0	0	0	0	0	0	42	0	95
OTU28335	14	0	0	4	1	0	0	0	0	0	0	0	0	1	0	0	29	20	0	0	28	0	2	0	1	1	0	0	6	2	0	17	0	0	0	0	0	0	57	4	0	0	0	0	18	0	0	1	1
OTU28367	0	0	1	2	0	0	0	0	3	0	0	0	0	25	0	1	0	0	0	0	0	0	0	0	0	0	0	0	21	0	0	0	0	26	0	0	0	24	1	82	0	0	0	0	1	0	0	0	0
OTU28390	4	0	0	0	18	0	14	8	1	8	0	0	0	0	0	6	0	1	0	1	30	0	1	48	1	0	1	0	2	9	3	1	2	1	2	4	0	1	0	0	104	1	24	2	10	0	0	0	0
OTU284	37	33	27	58	10	40	16	44	60	16	0	1	1	2	7	3	20	2	0	0	0	0	0	22	184	42	0	0	21	0	0	0	0	0	1	0	0	52	0	0	36	0	51	0	1	0	0	0	52
OTU2841	0	0	0	7	0	0	0	20	15	0	0	9	0	0	48	25	0	1	0	0	1	3	31	8	0	0	0	0	2	23	0	0	0	0	0	2	0	1	0	24	0	0	0	0	0	33	0	1	23
OTU2849	0	0	3	7	0	5	0	0	0	2	10	0	0	0	0	0	0	0	0	30	36	1	0	0	0	24	0	61	3	0	0	48	51	0	1	0	0	0	29	0	29	0	0	0	5	0	0	0	0
OTU285	60	38	37	32	46	23	32	27	65	0	1	1	0	2	0	1	3	1	0	2	0	1	0	0	0	0	0	0	0	19	0	1	0	0	0	0	0	2	0	0	24	0	0	1	0	0	0	0	0
OTU2850	7	5	0	0	0	0	1	0	0	6	0	3	7	39	3	0	17	6	1	1	1	21	2	0	3	0	0	0	22	53	78	1	1	53	47	1	2	0	0	1	1	0	29	0	0	0	0	28	0
OTU28519	9	0	16	0	0	0	0	0	0	0	0	5	0	0	0	0	1	0	2	0	0	0	1	61	22	0	1	51	1	0	0	0	1	80	0	0	1	0	0	0	0	0	0	0	43	70	0	0	1
OTU28597	0	0	11	12	0	10	0	1	0	13	0	15	0	0	0	69	0	0	0	0	0	0	2	2	1	0	68	0	4	0	34	0	53	0	0	0	0	0	0	0	0	1	0	0	1	0	63	0	26
OTU286	26	31	11	8	24	32	24	8	0	0	0	0	0	16	0	0	0	1	0	0	65	0	1	0	0	40	24	0	0	20	1	21	0	0	22	0	18	36	42	0	0	0	0	0	0	0	0	0	0
OTU28624	34	14	4	4	12	22	28	2	21	12	0	0	1	0	1	6	57	3	36	0	7	29	35	0	36	0	93	26	3	103	98	33	0	0	0	16	81	19	64	1	0	0	0	59	0	3	79	62	0
OTU287	6	83	42	85	29	10	19	50	49	10	0	7	0	0	0	10	0	0	0	56	3	1	0	0	22	21	56	0	18	19	0	11	0	69	0	29	21	0	14	0	0	0	0	0	16	1	23	0	0
OTU28720	15	27	57	53	26	23	8	11	40	12	6	20	0	3	1	63	3	65	1	87	1	15	37	42	5	2	7	38	56	91	72	24	37	1	2	3	5	45	1	0	145	23	43	67	36	18	109	0	24
OTU2878	0	0	0	0	1	8	0	11	0	0	9	0	0	0	0	0	0	0	0	0	0	35	0	15	0	1	0	0	0	0	0	47	0	0	0	0	0	2	0	0	0	1	56	0	33	0	0	0	0
OTU288	24	62	109	43	13	50	23	49	75	5	0	23	14	10	19	101	4	70	36	80	44	85	159	55	52	28	36	1	100	21	28	1	4	46	31	127	84	59	0	60	3	83	1	4	52	86	91	36	1
OTU2881	0	0	11	0	0	11	9	1	2	0	0	1	0	0	0	0	54	0	34	0	0	0	0	32	0	0	0	0	3	0	0	19	0	0	0	0	0	0	0	0	1	1	45	1	2	0	0	0	20
OTU2884	59	10	19	34	1	13	1	11	21	11	12	18	4	26	51	40	43	13	1	3	2	91	1	26	50	0	94	0	45	89	1	41	1	1	4	0	26	36	1	3	0	61	0	3	36	0	64	55	28
OTU2889	21	12	0	0	0	0	0	11	7	0	0	0	0	96	3	40	1	1	0	28	86	46	47	69	1	2	2	21	80	1	0	0	43	46	0	0	1	64	0	41	8	1	2	1	36	59	18	0	67
OTU289	17	19	5	12	6	14	21	5	10	0	12	0	0	0	38	0	2	152	0	0	18	29	24	0	0	0	0	29	3	46	1	39	1	0	1	0	14	0	20	0	28	0	0	20	29	0	1	137	67
OTU29	728	659	685	554	804	563	772	722	572	10	4	2	8	15	6	58	1	37	5	2	3	5	0	29	1	1	2	0	31	68	28	8	5	2	5	74	4	4	2	2	1	2	0	21	36	2	0	0	0
OTU290	14	20	31	51	17	44	10	10	7	16	18	0	35	52	63	32	50	28	52	53	35	1	14	18	79	26	28	0	20	6	1	26	102	1	46	29	1	71	2	28	3	119	102	17	71	72	146	119	107
OTU29009	6	16	0	0	6	0	0	15	7	0	0	0	9	1	0	0	1	35	1	21	1	29	14	0	0	0	0	1	10	22	51	58	0	0	33	20	0	0	53	29	27	18	20	19	23	0	2	0	0
OTU2902	18	0	0	0	0	15	0	8	0	14	0	0	0	1	42	57	57	0	0	0	0	0	40	2	19	0	0	0	3	0	33	0	38	0	0	2	0	1	0	0	0	0	23	1	0	25	0	0	1
OTU291	4	0	0	1	1	0	6	0	0	8	8	10	26	44	23	0	2	0	62	2	0	65	49	0	76	0	0	0	36	213	50	0	71	0	0	1	21	3	0	34	51	73	95	0	84	0	0	1	118
OTU2910	28	0	2	17	36	10	0	3	0	0	9	0	0	0	0	0	0	0	0	0	0	0	0	0	0	0	0	0	0	1	0	0	0	0	0	0	0	0	0	0	0	0	0	0	0	1	0	0	0
OTU29147	0	0	0	0	9	12	0	0	0	4	0	0	0	0	0	0	0	0	0	0	0	0	0	0	0	0	0	0	0	0	0	0	0	0	0	0	0	94	0	0	0	0	0	0	0	0	0	0	0
OTU292	0	0	0	0	0	10	0	19	0	11	13	8	0	18	43	28	1	0	19	0	0	5	0	1	7	17	0	0	0	18	0	60	31	0	0	63	17	24	0	26	0	0	0	0	0	0	43	56	23
OTU293	0	0	0	6	0	31	4	2	0	0	0	0	0	0	0	20	23	51	0	0	38	25	0	9	45	12	0	0	1	9	0	2	73	0	0	0	0	65	0	19	0	25	14	0	2	0	0	1	0
OTU294	23	15	30	9	9	47	24	18	7	7	0	0	1	16	22	1	14	0	1	30	28	0	23	0	3	0	0	27	23	0	0	0	0	32	3	0	12	2	13	0	0	1	15	51	0	0	0	16	18
OTU29403	21	9	3	3	13	2	3	4	14	0	0	0	2	0	1	5	39	2	1	0	1	0	14	0	0	0	0	1	15	42	1	2	0	2	32	49	2	1	1	28	43	0	1	0	40	0	0	54	45
OTU2945	0	0	0	11	0	1	0	0	0	0	0	2	0	9	0	0	0	15	22	0	1	0	0	0	0	1	0	0	13	0	0	0	0	48	44	1	0	0	0	0	0	0	0	0	0	0	0	0	0
OTU2946	5	0	20	0	0	13	0	0	0	0	0	0	0	26	0	2	70	0	0	0	0	0	52	1	1	1	131	0	23	19	0	0	103	0	76	0	0	0	0	49	97	0	33	0	0	46	0	0	0
OTU295	0	3	12	7	0	0	0	3	10	0	0	2	0	0	6	44	51	0	38	32	33	50	1	0	0	74	0	0	13	26	0	32	68	0	1	0	23	0	0	43	0	22	38	0	0	0	0	32	44
OTU296	0	16	15	11	0	0	0	0	0	4	0	0	3	0	0	4	20	69	0	35	0	30	0	0	58	0	0	0	0	34	58	0	60	0	0	54	0	5	0	0	0	14	0	33	7	1	0	0	0
OTU2967	13	8	0	19	0	16	0	0	0	0	0	7	0	0	0	0	0	0	0	0	0	0	0	0	0	0	0	0	0	0	0	0	0	0	0	0	0	0	0	0	0	0	0	0	0	0	0	0	1
OTU297	13	0	0	18	20	8	0	0	16	0	13	1	0	1	0	20	11	0	37	0	42	11	28	13	49	16	2	61	48	0	31	0	0	32	17	1	0	0	0	1	33	0	0	77	4	0	0	1	0
OTU29701	8	0	14	0	0	0	0	0	0	0	0	12	0	3	19	48	0	0	0	3	0	0	1	68	0	0	0	74	0	0	0	0	0	0	0	0	0	1	30	56	43	0	0	26	0	0	0	0	26
OTU29745	3	9	0	0	0	9	0	0	1	0	0	0	0	37	0	0	0	0	0	1	0	0	1	0	0	0	0	0	0	49	28	0	0	48	0	0	1	0	0	26	2	16	0	0	0	0	0	0	0
OTU2976	1	0	8	0	6	7	0	19	0	0	0	0	0	0	31	0	0	0	0	0	0	19	0	17	0	1	0	0	39	36	0	0	0	0	0	0	3	1	0	0	0	0	0	7	0	0	0	0	0
OTU298	18	45	65	38	44	34	43	23	13	0	0	1	0	0	0	0	2	30	1	0	32	0	62	0	0	0	0	0	29	31	59	0	1	0	1	0	0	0	0	1	0	0	1	0	0	42	0	0	0
OTU2984	1	0	0	0	0	3	0	0	0	0	0	0	0	0	0	0	0	0	0	0	0	10	0	0	0	0	0	0	0	0	0	0	0	0	0	0	0	1	88	0	0	0	45	0	0	1	0	0	0
OTU29896	0	26	10	0	0	0	0	2	0	0	0	0	0	0	2	2	54	0	0	0	0	1	0	0	1	1	0	0	2	18	0	0	0	0	0	29	15	1	0	0	0	0	0	0	10	39	0	0	0
OTU299	39	50	72	8	17	15	40	78	54	17	1	1	13	18	41	38	0	45	1	37	58	4	1	9	20	8	3	8	103	29	0	75	1	27	32	0	0	25	32	1	0	0	17	2	0	69	1	80	0
OTU29944	84	69	75	60	65	52	63	29	29	1	25	6	0	1	23	76	0	20	66	41	30	16	47	1	19	0	43	0	21	71	0	0	41	0	0	30	1	0	0	1	72	0	22	0	0	0	27	70	1
OTU3	4691	4023	4300	4520	4453	4086	3853	4332	4520	378	286	175	438	788	1193	1135	1318	1120	1015	1515	643	587	545	899	1358	533	1171	1307	1063	1384	1261	1631	1601	1775	1919	1184	1796	1577	1539	1228	1279	1457	1839	960	1314	1177	1243	1279	1186
OTU30	369	492	454	460	545	273	367	407	517	28	39	44	68	211	195	179	327	142	320	91	225	94	116	313	58	104	119	193	302	213	132	241	191	253	201	197	259	240	263	343	227	90	380	245	77	485	309	516	214
OTU300	21	62	86	23	33	14	28	67	43	0	14	2	16	0	19	0	49	32	0	11	12	13	21	7	0	0	31	0	71	35	1	349	2	1	71	18	42	41	39	78	0	14	34	1	100	43	10	83	0
OTU30001	0	0	0	7	0	10	10	0	3	0	1	3	0	0	1	59	1	0	0	0	0	9	0	0	0	0	0	0	3	1	0	0	32	0	0	25	1	0	0	0	0	0	0	0	0	0	0	10	7
OTU3002	0	6	0	1	1	3	0	1	0	0	0	0	0	1	0	0	0	0	1	1	0	8	0	0	0	7	0	0	0	0	24	1	0	1	0	0	1	0	0	0	0	0	68	0	34	0	0	0	0
OTU3008	0	3	0	5	0	3	0	10	9	0	0	10	0	1	2	1	22	1	0	0	0	13	0	0	1	0	7	1	14	0	0	0	0	93	0	37	42	64	0	61	2	0	1	0	20	61	0	0	33
OTU301	12	26	10	59	48	25	40	41	10	0	0	0	0	1	0	31	0	0	0	0	1	0	0	2	0	0	0	0	0	0	0	0	0	0	0	0	0	1	0	43	0	0	0	0	0	0	0	0	0
OTU302	4	13	35	25	0	3	1	0	0	0	23	42	0	0	0	0	106	0	52	0	104	0	39	0	1	0	0	0	18	28	102	113	0	0	0	97	56	117	0	131	1	77	91	0	0	2	56	0	51
OTU3029	1	1	0	0	15	0	3	0	0	0	0	0	11	2	1	1	0	1	2	1	0	0	3	1	0	4	34	0	0	0	0	0	0	39	0	1	0	0	0	0	0	0	0	0	0	0	0	0	0
OTU303	7	11	4	0	24	3	15	2	5	0	0	0	18	1	1	51	0	0	0	0	0	0	0	0	0	0	1	0	0	0	0	142	1	0	0	0	1	0	0	70	0	0	0	0	0	0	0	3	0
OTU304	0	0	0	0	0	0	8	2	1	0	0	0	0	0	0	0	0	0	0	0	1	1	0	18	0	1	0	0	1	2	0	0	0	0	1	0	1803	0	0	41	0	0	0	0	0	0	0	0	0
OTU305	26	46	12	30	40	26	0	26	22	0	0	0	0	0	0	0	1	0	0	0	1	0	0	0	25	0	0	76	12	11	0	0	0	0	0	48	0	0	3	27	0	0	44	0	0	25	0	0	0
OTU3053	0	0	0	0	10	0	0	0	0	1	0	0	0	0	7	1	0	0	0	0	2	0	0	0	0	0	0	1	0	0	0	0	0	0	0	0	0	0	0	0	0	0	0	0	4	0	50	0	0
OTU306	13	5	23	0	1	6	0	2	4	9	11	8	0	0	18	0	0	1	0	1	5	15	21	0	0	0	30	1	18	1	57	93	60	27	0	2	0	8	0	0	62	20	0	1	31	0	1	47	38
OTU307	0	22	3	15	8	10	16	0	13	0	22	12	0	11	0	32	0	0	0	47	0	16	0	36	0	0	104	0	6	63	0	86	25	119	0	1	88	0	0	1	1	15	0	0	11	0	0	0	86
OTU308	35	30	8	22	1	1	14	5	7	0	0	0	0	0	0	0	2	0	0	1	1	0	0	2	1	1	0	0	27	8	0	0	40	31	0	0	0	31	0	0	1	0	0	1	15	1	25	66	22
OTU309	34	26	20	86	21	10	19	58	29	0	25	5	0	3	3	41	52	35	24	1	19	10	27	13	73	6	0	57	0	77	93	0	1	81	2	2	34	32	30	1	4	1	28	30	35	76	1	29	14
OTU31	68	63	65	69	54	57	67	39	59	44	29	20	22	206	106	300	70	141	61	109	37	168	201	110	199	95	98	66	190	154	29	148	66	111	330	87	52	36	245	180	102	108	125	244	254	211	74	48	137
OTU310	53	0	18	26	60	14	72	38	14	9	9	9	11	2	17	0	27	16	0	1	1	0	0	0	0	47	0	0	0	0	16	0	1	41	0	0	0	0	47	0	0	0	43	0	2	9	0	0	0
OTU311	0	4	0	0	0	0	0	0	4	14	14	6	8	40	53	16	27	1	45	22	0	14	12	48	0	0	44	44	20	22	38	0	13	37	0	1	8	0	8	59	86	0	49	0	0	0	0	0	0
OTU312	37	29	9	29	15	24	10	15	9	0	0	1	1	17	0	0	1	0	22	0	6	0	0	0	1	0	0	0	13	38	0	0	40	0	0	0	14	30	43	14	0	0	6	0	37	0	0	1	0
OTU3121	0	1	0	2	25	1	5	0	0	0	0	0	21	2	0	32	2	1	40	1	0	1	31	0	13	2	2	0	0	20	30	1	0	1	3	1	0	2	53	38	0	0	1	5	40	46	0	91	0
OTU313	72	37	32	42	30	48	17	30	48	23	8	4	22	0	0	64	15	73	28	33	0	44	1	0	90	2	0	1	6	18	1	42	66	0	16	35	34	65	0	69	59	16	65	80	17	50	37	0	24
OTU3136	0	0	1	0	0	0	0	0	0	0	0	0	0	0	37	0	2	1	56	1	0	0	1	70	0	0	1	0	1	0	0	0	63	0	0	0	0	1	0	0	0	0	1	0	1	0	0	0	0
OTU314	39	13	26	37	47	102	31	24	39	0	7	0	0	0	0	1	1	35	2	31	46	0	26	43	12	1	0	1	0	0	63	0	0	0	0	0	13	124	0	0	1	20	55	1	37	1	34	1	0
OTU3140	0	21	0	0	9	11	0	13	4	0	0	0	0	0	0	1	0	0	0	0	0	0	0	0	31	1	0	0	9	0	13	0	0	22	52	0	0	0	64	1	0	0	0	0	0	0	0	0	13
OTU3149	0	3	0	11	13	1	3	1	0	0	0	0	0	0	0	0	0	0	0	1	0	0	15	10	0	0	26	0	4	0	0	0	1	0	0	24	0	0	0	0	0	0	31	5	0	0	27	0	0
OTU315	36	27	1	6	15	28	0	32	54	5	0	0	0	0	0	0	22	0	18	0	0	0	0	1	0	0	57	48	0	7	44	43	0	45	0	57	9	0	0	0	48	0	0	9	0	0	0	0	81
OTU316	87	26	55	108	50	27	49	72	67	0	4	24	50	16	0	16	1	68	22	59	7	38	38	31	31	0	33	0	10	15	21	0	96	38	18	35	12	0	22	30	94	0	12	0	0	31	22	0	115
OTU317	56	38	40	78	116	81	42	36	46	6	1	2	3	13	12	12	83	11	6	10	11	4	8	1	11	6	30	9	19	17	10	75	8	4	11	11	7	26	38	8	2	41	44	19	42	0	19	0	1
OTU3172	0	0	0	0	23	4	0	0	0	0	1	0	0	0	0	33	0	0	0	0	0	0	0	0	18	0	33	0	0	0	0	0	0	0	0	0	0	0	0	21	0	1	0	0	2	26	0	0	3
OTU318	30	29	12	30	13	15	16	53	0	0	0	0	0	20	1	0	1	0	0	1	0	0	35	0	0	0	0	0	0	0	0	0	0	2	58	0	2	0	3	0	0	0	0	0	0	0	0	1	0
OTU319	4	24	37	31	11	9	26	1	8	4	0	0	2	32	0	101	2	32	1	85	58	43	13	16	28	25	0	6	54	77	48	2	58	32	75	34	40	20	49	43	41	20	1	0	27	32	5	30	27
OTU32	410	298	362	398	349	370	320	356	511	0	1	1	2	0	0	0	1	0	30	7	0	0	1	0	1	0	0	0	1	2	1	1	0	1	0	0	2	53	0	0	24	0	15	0	0	0	0	0	0
OTU320	0	14	32	27	43	35	40	39	21	6	0	5	9	1	0	0	24	54	0	14	0	1	1	33	0	23	1	1	8	0	0	0	0	0	0	15	0	0	0	0	16	0	33	44	3	22	33	1	1
OTU3202	1	0	15	39	0	11	1	1	8	1	1	3	0	0	16	2	2	0	2	22	0	20	9	29	2	0	1	37	14	16	0	2	0	24	0	0	16	0	0	47	1	0	0	20	39	89	25	0	18
OTU321	0	28	0	11	7	8	0	0	0	0	1	0	0	2	13	2	0	0	0	0	0	62	0	33	101	0	0	0	16	24	20	0	0	0	20	0	0	0	0	0	0	0	0	0	0	0	0	0	0
OTU322	0	15	0	6	0	1	37	12	17	0	0	9	5	0	32	0	18	0	0	0	0	0	0	43	0	1	0	0	33	0	0	52	77	47	33	0	25	0	0	36	0	43	74	1	0	40	35	0	35
OTU323	26	15	60	30	41	13	36	22	68	0	21	1	2	37	3	50	6	4	1	69	99	3	1	38	3	33	5	71	4	0	3	50	1	1	0	53	69	77	76	2	1	14	136	17	29	78	1	22	34
OTU3230	0	0	15	0	0	5	0	0	7	0	0	0	0	0	2	0	34	0	0	0	32	0	0	21	0	0	0	0	9	0	0	29	31	0	0	0	0	0	47	0	0	80	0	0	0	0	0	37	0
OTU324	9	1	7	3	15	6	7	5	29	7	0	0	12	15	1	0	28	3	1	1	14	109	19	0	2	1	2	43	2	42	45	80	0	40	31	29	1	2	22	0	0	28	65	1	45	19	3	1	2
OTU3240	10	18	27	2	9	6	3	48	41	1	31	12	1	18	34	3	92	102	0	36	11	1	3	16	1	8	56	0	44	24	58	18	54	1	25	1	58	26	0	23	68	1	22	0	15	3	53	2	27
OTU325	29	31	8	10	19	12	0	10	23	27	0	24	2	10	32	65	120	133	0	25	74	10	0	44	60	0	0	0	15	85	4	42	1	46	122	0	42	48	0	0	42	61	1	0	7	29	15	31	61
OTU3253	0	0	0	0	0	0	0	16	0	0	0	0	0	0	0	0	0	1	0	0	31	32	0	0	0	0	1	49	0	85	0	0	1	0	0	50	0	52	0	0	0	0	27	24	55	47	0	0	1
OTU326	9	26	38	30	32	29	30	39	12	1	1	9	10	21	25	3	144	2	22	1	52	47	2	1	2	26	4	23	22	70	2	0	0	8	26	53	1	9	44	37	1	1	49	1	4	5	33	0	26
OTU327	23	14	1	19	21	17	0	8	11	0	8	7	5	1	1	1	77	1	58	0	0	0	0	92	0	17	31	45	80	43	128	80	1	8	1	0	1	25	90	30	4	94	161	96	1	0	0	8	293
OTU3277	0	0	11	8	0	0	0	0	0	0	0	0	0	1	6	0	0	0	0	0	0	0	0	11	0	0	0	0	2	38	0	0	0	0	0	0	0	0	0	0	1	0	0	0	0	67	0	32	0
OTU328	55	52	26	23	15	27	33	55	29	0	0	0	0	0	0	1	0	0	1	0	0	0	25	22	0	0	0	0	0	0	1	88	1	0	0	1	0	0	0	0	0	0	0	0	1	0	0	0	0
OTU3283	0	21	8	24	16	4	0	14	18	0	4	0	0	0	1	43	0	30	0	1	15	0	1	21	0	1	0	0	1	1	1	0	0	0	0	0	0	38	32	1	0	1	1	0	0	0	30	0	0
OTU3287	10	20	0	16	6	6	20	0	10	0	15	0	5	0	0	15	3	0	65	0	1	1	3	0	0	24	0	0	23	20	52	0	0	1	0	0	0	100	0	30	2	0	34	2	29	0	38	0	0
OTU329	61	13	49	30	15	29	51	40	1	0	0	15	0	0	24	13	1	1	44	35	20	16	0	0	0	21	1	16	13	5	43	0	40	0	28	31	31	47	87	0	0	0	1	21	61	47	21	0	99
OTU3298	12	13	10	1	28	18	0	0	3	18	9	1	9	63	1	0	1	1	3	0	0	1	47	0	3	41	1	0	0	5	0	0	0	2	1	1	41	79	0	1	99	0	74	0	3	1	0	0	80
OTU33	120	211	181	146	125	165	242	186	180	36	12	39	4	11	69	71	27	5	103	228	119	26	84	50	59	34	51	5	25	84	5	17	7	32	145	123	35	34	140	210	135	85	28	30	24	86	119	126	39
OTU330	1	0	4	0	10	1	9	10	12	0	16	0	0	1	1	0	0	11	0	0	41	0	0	0	0	1	0	0	7	0	0	21	0	0	66	0	10	0	54	66	12	0	75	31	0	0	0	24	0
OTU3304	0	0	0	3	0	1	0	0	0	0	0	0	9	3	0	1	0	0	0	8	0	3	31	23	0	0	3	1	0	1	0	1	1	49	1	1	0	1	0	1	0	0	1	0	18	84	0	33	0
OTU331	1	13	11	4	13	21	0	19	42	0	31	0	8	0	0	0	0	16	0	0	0	0	0	32	0	8	0	0	0	9	0	0	0	24	0	0	0	0	19	1	97	0	0	0	17	0	0	0	0
OTU3312	0	1	0	0	3	0	0	0	0	0	0	0	0	0	0	1	0	24	0	0	38	0	1	29	0	0	0	0	0	0	0	0	0	0	0	1	0	33	0	0	28	0	0	1	0	0	23	38	0
OTU332	0	0	0	0	0	0	6	0	0	5	0	0	0	0	0	0	31	32	0	32	0	0	0	25	1	0	0	41	31	0	45	8	0	98	0	27	0	0	0	0	0	0	0	0	11	39	33	0	51
OTU333	0	6	0	11	0	0	7	0	0	0	0	32	0	0	22	45	0	0	0	3	39	0	29	0	0	12	0	10	0	30	27	77	0	0	0	0	0	42	0	0	0	31	52	63	26	44	20	0	0
OTU334	64	50	35	67	36	20	43	37	26	0	1	0	0	0	0	0	0	0	0	1	0	0	0	0	0	15	0	0	0	27	0	1	0	0	0	0	0	0	0	1	0	0	0	0	0	0	0	0	0
OTU335	42	36	41	6	35	8	33	28	38	0	0	0	0	0	0	0	0	0	0	0	0	0	0	0	0	0	0	0	0	0	1	0	0	0	0	0	0	0	0	0	0	0	0	0	0	0	0	0	0
OTU336	24	1	8	8	11	6	6	1	20	0	0	3	0	1	14	0	16	0	0	0	0	3	0	12	44	20	11	1	6	69	1	0	0	60	0	0	38	3	0	0	0	0	0	40	0	0	17	0	0
OTU3369	9	1	2	12	4	6	11	4	65	4	6	0	2	0	1	22	26	27	2	32	23	55	6	4	3	11	22	34	11	77	1	2	0	50	36	38	1	64	0	0	50	51	62	1	7	0	72	34	5
OTU337	4	74	18	56	14	67	33	25	41	42	1	0	2	56	66	4	1	2	0	2	57	109	108	0	1	0	57	43	56	50	80	0	48	97	0	68	1	81	51	58	2	0	49	1	94	0	0	92	31
OTU3371	0	1	9	1	11	0	0	0	0	8	0	0	1	0	0	28	0	0	35	24	0	0	0	0	2	35	42	30	19	0	0	0	0	1	1	1	0	0	1	0	0	0	0	0	15	0	0	0	1
OTU3373	9	0	11	0	0	0	11	0	0	0	0	0	15	1	0	0	18	0	0	0	0	0	0	1	0	0	0	0	0	0	30	29	0	41	33	0	2	28	43	2	0	0	56	0	1	1	59	0	0
OTU3378	0	0	0	0	0	0	0	0	0	0	0	0	0	1	56	0	0	0	50	0	0	0	0	0	0	0	26	0	22	0	0	0	0	0	0	0	0	0	0	0	0	0	0	0	0	0	0	0	0
OTU338	84	8	28	41	71	17	16	48	22	2	0	0	0	0	0	0	0	0	0	0	0	0	36	0	0	0	0	1	0	1	0	0	0	0	0	0	0	0	0	0	0	0	0	0	0	0	0	0	0
OTU3380	0	0	19	6	7	10	0	0	18	0	7	4	0	31	0	0	0	0	0	0	0	0	25	0	0	0	12	31	12	0	0	121	0	0	0	0	25	0	67	0	0	26	0	1	82	0	0	0	0
OTU3389	0	1	0	0	0	0	0	0	1	0	0	0	0	0	0	0	0	0	0	103	0	9	0	0	0	1	42	0	0	0	1	1	0	0	0	0	0	0	0	0	0	0	1	0	0	0	0	0	21
OTU339	34	52	59	57	39	20	19	33	4	0	0	3	0	0	0	0	0	17	0	0	0	0	0	0	0	0	0	0	0	0	0	0	0	0	0	0	21	0	0	0	0	0	0	0	0	0	0	0	0
OTU34	0	2	0	0	0	0	0	0	0	0	0	0	0	0	10	0	0	0	0	0	0	5	10606	11	4	3	3	4	4	0	2	0	0	0	0	0	0	0	0	0	0	0	0	0	0	0	0	0	0
OTU340	1	6	0	0	13	8	0	7	0	9	4	0	1	0	13	15	2	0	0	46	53	49	1	1	0	1	36	2	1	51	56	22	0	1	0	0	17	0	0	20	0	17	0	32	16	8	35	30	0
OTU341	40	11	1	1	0	12	0	0	0	3	0	4	0	0	1	62	0	0	30	1	0	72	1	1	0	1	24	0	13	176	48	1	31	0	0	0	0	41	0	2	0	52	0	0	10	5	51	24	30
OTU342	48	2	0	8	25	22	10	0	11	0	0	1	0	0	0	0	0	59	0	64	47	0	0	53	0	0	5	1	10	20	0	1	37	0	34	11	0	2	0	0	27	73	0	0	31	2	0	26	0
OTU3424	4	11	9	1	0	9	17	0	5	0	0	2	6	0	0	0	1	0	0	0	19	19	0	0	0	23	0	9	4	0	0	0	0	0	0	0	0	0	29	17	0	32	0	24	2	17	0	0	1
OTU3428	0	9	8	6	0	15	4	1	6	0	21	0	0	9	21	1	1	0	0	0	22	0	0	0	1	1	0	2	3	1	0	0	0	2	0	0	0	0	0	0	0	8	0	0	0	0	0	0	0
OTU343	7	29	24	28	9	56	7	19	19	25	39	21	1	45	84	51	145	29	107	18	27	30	49	70	3	22	22	115	209	54	30	30	46	2	1	45	40	82	43	31	6	19	19	1	123	1	33	77	119
OTU344	2	27	11	12	27	3	12	23	14	2	1	2	46	20	2	20	7	8	3	73	23	56	66	24	116	15	73	69	17	67	103	182	6	0	2	84	23	51	39	4	227	23	101	1	59	130	1	0	1
OTU345	18	15	48	12	20	25	36	44	28	0	0	16	7	1	23	66	7	0	0	15	61	30	51	45	121	0	0	83	13	32	0	65	2	0	0	1	0	2	31	30	24	0	2	4	18	37	0	3	20
OTU3450	0	0	0	9	0	1	12	21	0	0	0	1	0	3	32	50	1	0	72	1	38	0	0	0	28	27	0	2	0	0	0	0	0	0	0	0	0	1	0	0	65	1	0	45	0	0	0	0	10
OTU346	10	2	19	10	5	30	4	4	23	18	11	7	23	51	15	66	46	2	0	50	111	0	87	15	0	12	90	58	86	2	41	0	1	48	74	82	103	37	66	43	2	24	0	126	2	1	66	16	38
OTU3469	10	0	0	0	0	0	0	7	1	0	0	0	0	0	0	1	1	1	0	0	0	0	0	67	0	21	8	0	3	0	0	0	53	1	0	22	0	36	0	0	0	0	0	40	1	1	0	86	43
OTU347	5	0	11	1	7	0	2	0	0	3	0	2	0	19	0	0	6	17	2	2	2	5	33	1	0	0	43	0	0	1	1	0	43	0	46	0	31	2	61	0	19	66	45	0	1	0	38	0	15
OTU3474	0	0	0	3	0	0	0	0	0	5	0	17	0	0	0	0	0	0	19	0	0	0	0	0	0	0	0	0	0	0	0	0	41	0	0	0	17	0	0	0	0	0	0	0	0	63	0	0	28
OTU3475	0	1	8	0	0	5	0	0	0	0	0	0	0	0	33	0	0	2	0	0	0	0	0	0	9	0	0	0	24	0	0	1	0	0	1	0	0	0	0	0	0	0	0	0	0	28	0	0	0
OTU348	15	5	4	0	0	0	0	0	0	0	0	0	14	0	0	63	0	0	23	0	0	0	0	0	0	59	0	1	0	54	26	54	0	0	0	0	0	34	0	0	0	4	2	0	10	0	0	31	53
OTU3481	0	0	0	0	1	0	0	0	0	0	0	0	0	15	0	21	0	0	0	0	32	0	1	35	0	0	0	0	0	42	0	0	0	0	0	0	0	0	0	1	0	1	1	0	0	1	0	0	0
OTU3483	1	0	0	0	0	11	0	24	1	15	0	0	0	0	0	1	0	0	0	0	1	0	0	0	0	0	0	0	72	0	0	0	1	0	25	51	0	1	0	0	2	1	0	1	73	0	0	44	0
OTU349	8	5	21	9	16	30	15	17	7	3	0	1	12	3	68	51	38	0	104	24	38	30	61	3	4	3	28	33	4	39	2	135	57	26	138	24	42	2	28	2	30	27	1	50	3	46	0	67	49
OTU3490	18	9	3	19	1	0	3	0	46	0	2	5	5	0	18	0	0	22	16	0	21	2	24	0	54	0	0	0	16	0	32	0	0	0	37	0	0	12	1	0	0	0	1	5	7	59	1	0	0
OTU35	303	322	208	319	304	227	224	166	347	56	69	91	71	120	75	664	147	327	168	308	222	171	251	139	155	55	165	162	581	170	326	233	96	111	149	286	96	251	135	451	136	52	136	120	206	170	221	166	274
OTU350	31	14	24	15	14	47	21	49	34	1	14	3	11	3	75	38	4	1	27	4	42	45	52	72	4	0	109	1	13	58	33	26	3	27	5	16	68	0	0	5	1	12	105	5	26	55	1	20	23
OTU3509	0	0	1	0	8	5	5	4	1	0	6	0	0	0	0	0	0	0	0	0	22	0	0	20	0	0	63	0	0	0	0	31	0	0	0	0	0	1	0	0	0	0	0	0	11	40	0	1	0
OTU351	0	26	34	4	22	14	9	13	9	0	0	2	0	0	0	45	0	43	0	61	0	0	19	0	48	0	0	0	27	0	0	0	0	0	0	0	15	0	0	0	0	0	1	0	0	0	0	0	24
OTU352	87	23	18	32	37	29	38	14	39	0	0	3	3	0	0	0	33	23	0	0	0	0	0	21	0	0	0	0	16	0	0	36	0	0	0	36	22	0	0	58	0	0	0	13	0	0	0	0	0
OTU3529	13	10	22	12	18	4	31	4	24	1	8	15	40	39	2	28	2	2	18	22	0	22	2	17	2	3	7	1	29	0	5	5	1	20	0	2	34	25	48	2	7	6	0	2	48	0	39	0	129
OTU353	1	30	33	9	5	10	28	28	11	3	8	18	33	51	1	76	94	53	28	29	39	27	62	3	119	72	3	36	70	97	204	91	134	121	3	71	51	5	141	32	85	2	180	30	62	32	100	0	113
OTU354	14	0	0	4	0	0	0	0	0	0	6	0	0	1	27	0	0	58	0	0	0	0	0	0	0	17	0	0	12	52	1	80	0	1	0	0	0	0	32	0	0	16	0	0	0	26	0	0	0
OTU3540	17	7	0	0	1	6	0	0	0	0	0	14	0	1	44	0	1	41	0	0	0	0	37	42	62	0	0	1	5	0	35	0	42	75	48	0	0	0	0	42	0	49	0	0	1	0	30	1	0
OTU3547	0	0	8	0	0	0	6	0	0	0	0	0	0	0	0	0	16	0	0	0	7	0	0	0	0	0	19	0	0	14	90	17	0	0	0	0	1	0	0	0	0	0	0	0	0	0	0	0	37
OTU355	0	14	0	12	18	0	0	10	4	4	6	8	11	3	29	0	35	2	31	16	0	0	16	0	2	5	0	70	0	0	0	0	0	1	0	0	0	32	88	15	0	1	30	0	0	35	1	2	0
OTU3559	0	0	1	0	0	3	0	0	0	0	3	0	0	1	0	0	0	0	0	1	0	0	14	0	0	0	2	32	0	0	34	0	0	0	0	0	0	1	0	0	0	0	0	0	0	0	0	0	0
OTU356	15	1	10	9	0	0	14	0	0	0	6	0	0	0	1	0	0	35	0	0	0	0	34	16	26	3	0	44	0	0	84	0	0	65	23	0	0	0	0	0	0	0	0	0	16	8	1	0	0
OTU3566	22	8	16	2	4	21	13	25	5	5	13	1	22	125	59	46	73	1	2	40	85	0	0	1	29	38	1	47	0	1	1	40	26	102	36	0	53	19	16	0	70	36	73	72	44	38	0	57	34
OTU357	9	16	32	19	12	23	34	49	25	0	37	5	20	34	64	7	140	75	65	137	60	110	36	102	62	90	33	35	52	105	74	27	3	120	88	40	1	126	33	2	40	21	1	32	92	0	30	1	88
OTU358	5	19	11	44	12	7	35	39	27	0	0	2	0	0	0	1	0	0	15	0	0	0	10	0	0	0	0	0	0	0	0	1	1	0	25	0	0	0	0	0	0	0	0	0	0	0	0	0	0
OTU359	1	6	6	9	13	13	30	1	15	0	0	0	4	0	1	0	0	0	21	27	1	0	0	0	1	1	1	1	0	0	1	2	0	25	1	9	1	84	0	32	1	22	30	2	14	0	24	34	0
OTU36	135	90	49	72	102	113	116	96	67	49	7	36	51	0	73	88	264	138	23	98	70	111	171	169	39	76	152	132	65	214	56	411	70	67	108	185	78	171	316	152	133	59	230	2	163	79	47	277	142
OTU360	35	3	90	30	32	23	17	4	11	9	0	12	33	1	21	0	9	0	34	0	1	4	0	0	1	0	0	0	0	21	0	1	1	0	0	18	7	0	0	0	0	0	1	0	0	0	0	0	0
OTU361	94	122	87	77	85	71	130	99	79	0	0	3	2	1	1	1	1	1	0	0	0	0	0	0	0	0	0	0	0	0	0	0	0	1	1	0	0	1	0	0	0	0	1	1	0	0	0	0	62
OTU3613	0	0	3	0	10	1	7	0	0	0	0	0	0	0	0	0	0	0	44	0	0	0	0	0	0	0	0	0	0	0	23	0	0	0	83	1	0	0	48	0	0	3	69	0	1	0	0	0	0
OTU362	1	9	20	0	10	12	30	17	13	7	1	3	0	0	0	0	0	29	1	0	119	0	0	0	1	0	0	19	9	0	11	1	8	0	73	28	26	0	0	1	47	43	43	0	63	0	31	48	0
OTU3625	24	0	0	0	5	0	22	0	1	0	0	0	0	0	10	2	1	0	23	1	0	20	2	0	1	0	1	39	13	0	66	1	3	0	1	1	2	0	0	1	0	0	0	0	45	35	0	0	0
OTU363	24	6	7	6	12	2	0	12	35	9	1	2	2	2	30	0	46	76	0	1	0	1	0	48	1	45	1	67	31	1	28	30	1	12	1	0	4	45	0	1	0	15	1	16	12	0	0	59	38
OTU3632	7	0	17	0	0	6	0	2	0	0	0	8	0	0	0	51	0	0	0	0	29	0	0	0	1	1	0	0	15	0	0	1	0	0	35	0	0	0	0	0	2	0	0	0	40	2	0	0	0
OTU364	35	24	69	41	17	40	11	69	35	7	0	11	0	70	64	41	0	2	36	35	1	16	42	3	55	13	0	52	0	17	34	0	199	1	0	1	65	16	0	0	118	0	2	2	35	51	0	9	0
OTU365	0	20	47	3	8	9	0	19	2	0	0	0	0	0	0	0	0	3	0	0	60	0	0	0	0	55	8	0	24	30	88	1	0	162	0	0	57	1	31	0	1	0	0	0	71	0	27	0	0
OTU366	46	25	46	22	17	23	19	42	39	5	0	1	0	0	0	0	0	1	13	0	0	0	1	0	0	0	0	0	0	0	0	17	1	0	0	114	0	0	0	0	0	0	0	0	0	0	0	0	0
OTU3664	0	0	0	0	0	0	1	23	0	0	0	0	0	0	0	22	28	0	1	21	0	0	0	0	0	0	1	24	25	0	0	0	0	0	0	1	0	0	0	0	0	0	0	0	0	0	7	0	0
OTU367	25	18	0	47	10	16	16	80	5	2	0	2	0	26	34	12	0	0	45	70	0	0	0	0	0	0	0	67	0	0	0	0	0	0	0	0	0	0	0	0	0	35	0	0	0	0	0	0	0
OTU3677	0	0	0	0	0	0	5	0	0	0	0	0	0	2	1	0	19	0	0	1	0	1	1	0	1	11	1	0	0	21	69	0	0	0	0	0	0	0	69	0	0	0	0	0	1	0	2	0	0
OTU368	8	0	12	0	0	10	4	14	0	0	0	0	0	0	18	42	0	0	0	0	21	21	0	0	0	1	0	0	7	28	0	0	0	0	0	36	44	0	0	48	0	0	0	0	0	0	0	0	2
OTU369	32	13	0	1	9	13	26	0	0	5	0	0	0	0	16	27	0	0	0	31	19	0	0	0	30	39	28	46	0	25	71	12	1	0	84	1	33	21	18	63	17	0	1	53	0	0	0	0	0
OTU37	75	90	54	100	101	161	128	157	55	107	74	63	45	166	175	285	182	265	427	237	248	179	125	67	222	117	231	269	170	193	199	439	297	346	283	175	76	146	117	288	303	221	175	34	127	145	271	433	507
OTU370	0	23	12	6	0	0	0	8	13	1	10	0	0	0	0	14	0	0	0	0	23	0	0	0	0	0	44	0	0	18	0	63	0	1	0	0	0	0	0	71	0	0	30	0	27	0	0	65	0
OTU371	3	1226	4	0	0	0	7	11	13	0	0	0	3	0	5	36	1	0	0	0	0	0	2	0	12	0	0	0	2	0	72	1	0	0	0	0	0	0	0	0	0	446	0	3	0	1	1	30	0
OTU3714	1	0	0	0	7	2	0	0	1	7	0	0	21	25	0	2	41	16	0	0	0	11	23	13	0	0	62	0	0	6	0	0	1	0	41	6	0	37	0	0	0	27	52	0	0	0	0	0	28
OTU372	50	13	28	18	22	39	15	17	22	1	0	8	22	0	12	37	46	0	29	1	37	0	0	76	129	104	1	46	29	6	0	0	0	2	14	69	124	2	0	27	113	1	133	63	68	43	49	132	4
OTU3724	16	35	44	0	2	15	16	29	10	0	0	0	0	0	0	0	0	0	0	0	0	0	0	0	0	0	0	0	0	0	0	0	0	0	0	0	0	0	0	0	0	0	0	0	0	0	0	0	1
OTU373	5	16	9	1	20	15	11	8	10	50	0	16	38	72	1	53	1	0	45	0	30	39	18	80	2	0	3	2	40	73	27	44	0	1	36	42	59	3	46	1	37	39	34	0	38	42	1	51	38
OTU3736	21	4	18	17	0	7	2	0	21	0	0	0	0	1	0	27	0	21	0	0	17	0	0	0	0	0	14	0	0	1	55	0	0	1	2	0	0	1	0	0	30	33	0	13	0	0	0	0	0
OTU374	1	2	8	22	8	3	6	1	10	0	0	0	3	98	66	45	2	1	3	1	1	0	1	24	1	41	0	0	16	0	0	27	116	27	0	35	1	1	75	85	0	1	1	1	57	63	38	0	0
OTU3746	0	0	0	0	0	6	0	0	0	0	0	0	3	0	0	0	0	0	49	35	0	0	1	1	0	0	0	106	39	0	0	0	0	0	6	0	19	0	0	0	0	2	0	0	0	41	0	0	0
OTU375	0	1	0	0	0	0	0	0	0	0	0	0	0	0	0	0	0	0	0	0	0	0	0	866	1	0	1	0	0	0	0	1	0	0	0	0	0	0	0	0	0	0	37	0	0	0	0	0	0
OTU376	6	8	19	11	0	24	13	8	16	0	1	7	0	9	27	1	88	109	65	0	8	3	14	1	75	2	1	5	18	27	2	29	43	18	0	65	22	1	30	43	41	23	24	1	33	56	42	3	26
OTU3765	0	0	0	0	0	0	0	0	5	14	0	0	0	0	43	0	0	0	0	2	0	0	0	0	30	3	0	0	1	0	1	3	0	52	0	0	0	23	50	0	1	0	0	0	0	0	0	37	0
OTU377	0	24	0	9	0	0	8	12	0	0	12	0	8	0	0	22	28	75	0	29	1	0	0	9	38	22	99	51	0	0	41	0	25	8	81	1	0	3	147	44	73	14	58	0	15	0	77	70	0
OTU378	40	26	49	23	28	12	19	38	24	8	13	1	0	23	1	0	1	72	0	0	24	18	40	1	1	1	20	1	4	14	1	4	18	0	0	0	0	47	1	0	89	24	1	82	0	0	65	0	0
OTU379	15	0	0	1	0	0	6	2	0	0	5	0	1	39	27	0	41	0	27	0	0	0	0	1	20	0	0	0	52	1	28	26	1	1	0	0	22	0	25	0	0	26	1	0	0	0	101	29	31
OTU3795	19	73	14	66	14	33	63	11	7	0	1	0	0	0	0	0	0	0	0	0	0	1	0	0	0	0	0	27	5	0	0	0	0	0	37	16	0	0	0	0	0	0	29	0	0	0	37	0	33
OTU38	498	615	429	416	613	497	500	653	540	10	32	10	8	37	62	31	105	1	150	20	31	88	29	149	38	45	97	43	97	118	30	78	84	97	157	6	3	103	132	33	99	93	35	1	326	141	51	92	82
OTU380	0	44	94	14	38	14	45	29	0	0	0	1	0	0	0	0	1	0	0	0	0	48	0	0	0	0	1	0	0	0	1	0	0	0	37	0	0	18	0	0	0	0	0	0	0	0	0	0	0
OTU381	14	12	52	21	33	3	28	27	46	12	17	10	11	57	66	75	3	3	5	4	23	16	21	3	17	6	32	34	16	0	46	4	0	1	65	2	40	55	68	36	19	10	20	73	28	1	1	64	226
OTU382	80	61	65	38	51	61	48	62	62	0	0	0	37	26	10	51	31	1	36	65	29	24	28	19	21	11	0	0	19	0	29	114	43	22	83	0	44	101	62	116	1	30	62	64	10	59	42	54	34
OTU383	2	26	27	21	30	4	8	12	36	0	1	2	0	17	0	4	0	2	0	13	13	7	0	0	0	32	0	2	45	15	94	107	20	0	0	99	1	93	0	105	1	15	0	0	57	1	31	60	41
OTU3833	6	5	9	0	0	11	0	0	0	11	0	9	0	0	0	7	36	73	1	0	0	0	0	27	0	23	2	19	1	0	0	0	1	65	90	0	52	0	1	0	0	0	17	0	21	0	0	0	0
OTU384	8	26	15	0	19	33	19	14	24	6	0	1	5	95	7	50	112	43	67	126	1	2	0	16	86	18	112	35	21	20	52	0	132	2	92	3	37	2	21	46	72	2	61	53	97	85	79	165	47
OTU385	40	21	1	0	0	19	0	24	47	2	9	0	0	105	2	61	1	4	34	0	2	35	19	73	2	17	37	5	25	99	11	23	8	2	30	4	30	34	60	1	2	70	2	1	14	23	0	0	0
OTU3850	22	27	28	35	50	12	38	34	57	0	0	1	9	24	0	78	11	0	19	26	22	0	0	0	0	0	0	25	33	0	0	17	30	51	78	1	0	18	0	27	58	21	9	18	10	1	34	0	23
OTU386	44	46	13	38	69	20	21	36	27	0	0	1	0	37	0	0	0	0	0	2	1	0	0	14	0	0	1	0	0	0	0	0	0	0	0	0	0	0	0	0	0	0	0	0	0	0	0	0	0
OTU3869	0	0	0	0	0	16	0	0	9	4	0	0	5	27	0	2	0	56	0	0	0	1	0	0	0	20	0	0	0	71	0	0	1	0	0	0	0	0	0	41	0	1	0	0	0	0	0	0	0
OTU387	6	19	17	26	22	9	13	11	15	0	0	1	0	0	0	0	1	0	0	0	0	0	0	0	0	0	0	0	1	29	35	0	27	0	24	52	41	1	0	36	0	0	32	37	0	0	0	0	0
OTU3879	61	14	3	0	30	0	33	1	0	12	0	0	0	1	29	36	0	0	31	1	8	0	0	23	0	13	0	59	13	22	43	0	0	0	0	1	0	9	0	0	0	14	2	0	18	26	0	0	0
OTU388	7	13	27	25	55	29	28	39	35	1	0	0	9	15	64	149	0	41	0	97	1	0	0	0	0	3	0	0	9	38	29	2	0	0	0	0	0	0	0	1	0	0	0	0	0	0	0	0	31
OTU3889	0	35	21	1	9	21	15	3	11	0	0	1	0	0	1	18	2	0	0	1	0	0	14	0	30	28	0	0	16	0	0	35	0	0	0	0	0	48	0	32	0	2	0	46	18	0	0	0	0
OTU389	31	11	7	13	60	13	33	34	3	16	8	13	33	65	75	51	34	72	27	52	43	0	24	28	24	48	44	106	80	126	22	13	3	34	82	85	13	18	1	196	4	30	6	0	17	70	95	53	52
OTU39	277	414	420	390	460	370	449	367	504	192	201	169	408	676	668	1087	889	1073	644	1080	767	549	655	933	1269	315	929	928	1167	1014	1040	846	711	1157	834	1239	577	1012	990	1166	1102	649	537	886	709	1104	1028	1047	1047
OTU390	10	13	3	0	0	0	0	0	0	12	10	20	0	29	38	43	0	0	0	0	0	0	36	40	0	1	0	0	0	0	1	1	28	0	1	0	0	1	29	0	46	38	48	0	75	21	0	1	0
OTU3903	0	2	17	7	0	19	1	0	6	9	0	0	0	2	3	0	2	0	2	33	33	1	0	0	27	1	24	3	16	78	1	2	3	2	61	1	0	29	2	0	35	17	52	0	0	0	24	37	0
OTU3909	0	4	0	1	0	0	0	0	0	0	0	0	0	34	0	0	70	0	55	0	1	14	0	0	0	0	1	0	0	0	0	30	0	0	81	0	0	0	0	0	0	19	0	0	0	0	0	0	35
OTU391	23	114	24	20	56	36	40	18	32	0	2	0	7	14	20	0	50	0	0	0	1	1	0	18	0	1	35	0	2	0	0	1	1	0	44	71	0	35	44	0	21	0	1	0	2	2	0	0	0
OTU3918	0	0	2	0	0	0	0	8	0	0	0	0	0	0	0	1	0	1	0	1	0	1	0	8	1	0	0	0	1	0	0	1	0	3	0	0	0	0	37	0	1	0	0	0	30	0	0	25	1
OTU392	3	12	7	12	16	25	7	8	2	3	6	14	33	6	43	42	2	53	90	25	83	1	36	91	6	19	69	2	60	70	59	22	80	2	37	59	4	75	0	47	1	23	35	10	1	0	9	124	137
OTU3920	19	3	8	0	7	19	2	10	6	0	1	0	0	1	30	107	1	0	1	0	27	2	0	0	0	2	0	0	1	0	0	1	0	0	0	34	0	0	0	1	0	22	0	0	25	47	45	0	104
OTU393	11	9	8	6	2	3	24	15	11	0	3	0	2	1	8	1	15	0	0	0	0	14	0	0	0	0	30	0	5	0	0	0	0	0	0	0	0	0	0	0	0	0	0	1	13	17	53	0	22
OTU394	13	0	0	0	0	0	0	9	11	0	0	0	0	0	0	31	0	0	0	0	0	0	0	46	0	0	0	0	69	93	0	0	0	0	0	0	0	18	0	0	0	1	1	28	78	150	0	0	0
OTU395	10	0	2	0	20	0	2	39	0	3	0	1	0	37	0	2	1	17	0	0	0	0	25	1	43	0	0	0	10	46	2	0	50	0	0	35	1	1	2	0	0	0	0	0	12	81	0	0	51
OTU396	0	0	10	0	11	0	0	4	0	0	0	0	0	1	28	0	0	0	0	0	0	0	0	43	0	0	15	0	0	0	0	0	33	0	0	0	0	0	22	0	1	1	1	47	0	0	0	60	56
OTU397	26	10	21	62	54	14	33	67	20	1	0	2	0	0	0	1	0	0	0	0	1	0	0	0	0	0	0	0	0	0	1	0	0	0	0	0	0	0	0	0	0	0	0	0	0	0	0	0	0
OTU3977	17	0	1	0	3	5	5	0	0	0	0	0	0	0	0	36	0	1	0	57	0	0	15	1	1	0	0	2	41	0	0	0	116	1	0	0	0	0	0	0	0	0	0	0	0	0	0	0	0
OTU398	0	23	0	12	0	20	7	0	0	17	3	1	12	11	0	18	30	1	26	0	26	0	0	0	0	48	35	19	41	30	0	0	0	13	0	0	81	49	27	0	0	0	0	37	0	36	13	31	0
OTU399	0	5	0	23	11	26	27	26	34	1	10	0	0	1	0	0	0	0	0	0	0	0	0	0	13	0	0	1	0	0	0	0	1	0	0	0	0	12	0	0	0	0	0	0	0	52	0	0	0
OTU4	4173	4195	4218	4003	4177	3240	3937	4013	3802	38	22	34	33	27	133	78	137	52	65	49	13	18	57	27	185	7	66	34	57	56	11	83	12	20	83	30	19	7	29	65	6	36	4	10	116	53	40	87	11
OTU40	360	327	329	297	443	271	390	309	393	2	0	0	0	0	0	1	2	0	24	13	1	8	1	0	37	24	0	38	0	10	1	0	1	0	0	1	1	13	0	0	0	0	0	21	0	42	0	0	0
OTU400	0	0	26	15	29	37	10	18	18	0	14	0	4	12	0	34	0	1	0	2	27	45	0	0	0	37	0	0	0	2	1	2	7	0	59	1	0	21	0	1	0	12	37	87	127	0	0	0	35
OTU4004	0	5	0	4	0	0	13	0	0	0	0	0	0	53	0	0	0	0	0	20	1	0	0	0	0	0	0	0	0	0	0	0	0	0	1	86	10	1	0	21	76	0	0	0	0	75	0	0	0
OTU401	43	20	14	27	33	40	32	33	31	3	0	10	29	18	0	45	49	1	29	34	91	23	48	9	10	0	0	0	91	7	50	64	12	54	81	191	30	2	68	69	208	86	0	98	76	98	29	128	10
OTU402	16	12	17	65	26	0	26	21	0	5	0	3	0	1	19	46	25	3	74	59	1	22	41	89	113	2	110	2	0	11	0	2	1	62	55	15	4	41	32	42	0	4	2	21	4	66	46	0	0
OTU403	0	0	14	14	3	19	0	18	38	12	0	1	2	55	115	1	29	3	36	0	0	49	0	35	71	3	0	1	15	33	167	75	49	2	1	0	64	0	0	75	104	0	1	2	43	0	0	0	8
OTU404	2	2	0	24	0	0	0	21	23	15	0	13	1	31	39	21	0	32	0	52	26	2	3	17	0	8	0	56	76	16	54	0	0	100	96	1	36	36	80	0	32	0	0	1	24	30	75	131	0
OTU405	0	8	0	9	0	6	0	0	0	0	0	0	0	1	14	14	0	22	0	65	31	0	0	0	82	0	0	0	23	0	26	0	0	0	0	26	0	0	0	40	0	0	0	0	0	0	25	0	0
OTU406	2	0	0	0	0	38	0	0	0	0	11	5	1	0	0	0	37	0	0	33	16	0	0	57	68	0	0	61	10	34	0	0	0	0	0	0	0	17	0	0	79	0	0	53	0	0	0	0	15
OTU4063	0	3	1	6	0	0	0	0	3	0	0	0	0	6	0	0	0	0	0	0	0	0	0	18	0	0	0	0	18	0	0	0	0	0	0	2	43	1	0	0	0	0	0	0	22	0	0	0	0
OTU407	16	0	0	17	0	0	4	0	38	0	15	14	0	1	39	0	0	34	52	0	1	0	40	0	0	1	0	0	0	0	52	0	41	0	0	0	0	0	0	0	0	0	67	0	22	0	0	0	0
OTU4071	17	17	20	18	13	1	5	23	8	0	0	0	0	0	0	0	0	0	0	0	0	0	0	0	0	17	0	0	30	34	0	0	0	2	0	0	0	0	0	26	0	1	0	0	0	0	14	0	0
OTU408	17	59	29	33	59	13	18	15	68	0	0	0	0	0	0	0	0	0	0	1	0	0	0	0	0	0	0	0	0	0	0	0	0	0	0	0	1	0	0	0	0	0	0	0	0	0	0	0	0
OTU4083	10	1	30	46	39	29	26	16	44	0	3	3	0	0	0	0	0	0	16	0	19	0	27	16	0	9	33	37	170	41	27	0	0	0	1	0	15	0	28	0	0	0	3	20	8	0	0	0	0
OTU409	46	52	8	31	17	7	1	19	19	1	0	2	0	3	0	73	0	0	0	1	24	0	0	1	0	5	11	42	19	3	0	0	3	0	1	19	0	0	0	0	0	2	6	1	1	0	1	0	0
OTU4090	0	0	0	1	12	0	9	0	9	0	0	16	0	2	0	57	1	66	2	2	0	0	0	0	1	1	51	36	21	1	0	44	0	0	0	0	35	0	0	0	0	0	1	0	0	0	0	0	44
OTU4094	0	0	1	8	1	4	0	0	5	0	0	0	0	0	0	0	28	0	26	0	0	0	61	0	0	0	1	3	0	32	2	0	0	0	49	0	1	40	0	0	0	24	0	0	0	39	22	0	40
OTU41	233	381	332	308	332	268	277	253	299	24	0	1	1	23	0	0	1	98	0	0	7	0	6	16	1	0	20	19	0	2	35	0	0	7	1	22	0	0	12	1	0	0	52	1	5	0	4	27	0
OTU410	10	10	50	37	23	32	34	22	5	10	16	13	32	43	3	0	14	78	2	2	54	71	3	22	3	2	90	147	58	75	19	1	24	21	40	60	27	34	1	0	22	16	44	107	41	1	53	63	90
OTU4106	7	0	9	9	14	24	0	16	19	7	0	0	0	15	35	28	0	0	73	46	0	0	0	9	0	0	0	0	14	15	35	0	128	0	0	0	0	31	0	0	1	22	25	4	1	3	0	0	29
OTU411	44	48	69	22	4	36	28	25	74	0	0	0	0	0	0	1	0	0	0	0	1	0	0	0	0	0	0	0	0	1	0	0	0	0	0	0	0	0	0	0	0	0	0	0	0	0	0	0	0
OTU412	21	12	47	0	19	23	6	19	43	1	2	10	16	24	0	0	54	1	4	4	42	0	0	18	1	1	34	27	0	0	1	1	36	3	0	25	0	59	0	0	77	17	0	4	0	0	1	15	1
OTU413	38	18	55	12	12	8	18	0	55	0	0	0	0	0	1	46	0	0	0	0	0	0	0	0	0	0	0	0	0	0	0	0	0	0	0	0	0	0	0	0	0	0	0	0	0	0	0	0	0
OTU414	0	0	0	0	0	0	0	4	0	23	0	1	0	41	0	62	60	0	0	0	0	0	0	0	0	0	0	0	6	37	0	0	3	60	1	0	0	0	0	1	0	0	0	2	98	0	0	13	0
OTU415	3	0	20	1	2	10	0	0	0	0	11	0	4	0	0	31	14	0	1	28	0	0	0	0	0	0	52	31	0	65	0	0	0	60	0	0	0	0	3	46	0	0	1	28	17	0	0	0	0
OTU416	15	15	21	23	18	6	24	21	16	20	4	18	1	5	118	3	81	126	39	65	3	6	47	29	43	2	2	106	32	105	3	133	90	52	1	43	42	174	33	48	23	52	25	71	23	0	0	120	39
OTU417	66	89	70	60	69	71	71	47	133	3	0	2	0	2	0	0	3	0	0	0	0	0	0	0	22	0	0	0	0	12	0	0	0	0	0	20	0	0	111	0	1	0	0	0	0	27	0	0	0
OTU418	0	4	0	8	4	0	2	0	9	0	0	0	0	0	1	0	19	22	0	44	0	0	0	0	38	12	0	0	3	0	23	0	0	46	0	0	0	0	0	77	0	0	0	0	0	0	13	0	0
OTU419	33	1	0	6	7	17	1	6	3	5	0	0	32	17	0	0	0	1	20	39	0	10	0	44	1	0	0	0	8	0	0	0	0	0	0	0	0	0	0	0	0	1	15	29	1	19	1	36	29
OTU42	92	97	114	124	110	169	66	130	49	34	60	31	66	257	310	215	463	367	570	334	259	160	212	415	420	131	502	178	228	293	419	449	492	124	397	556	169	142	330	276	410	177	448	267	349	440	366	570	547
OTU420	0	0	4	0	0	7	0	5	0	0	0	0	3	0	18	3	21	0	24	0	15	0	1	17	74	1	0	0	0	27	0	1	4	36	0	2	1	1	1	1	0	0	14	0	1	0	0	0	0
OTU4201	0	0	0	0	0	0	0	0	0	0	0	0	18	0	0	65	0	0	0	0	0	0	0	48	0	10	0	0	0	0	53	0	0	0	24	0	0	0	0	0	0	0	0	25	0	0	0	0	0
OTU4206	0	0	0	0	0	0	0	0	0	17	0	2	13	1	17	0	30	1	0	0	0	0	14	0	39	11	0	42	10	0	0	0	21	9	0	7	3	1	42	0	85	4	0	7	15	1	8	3	3
OTU421	0	0	0	0	0	0	0	0	0	0	0	0	0	0	0	0	0	0	0	0	0	0	0	0	55	0	29	0	0	0	25	0	0	0	0	0	1	0	0	79	0	0	0	0	0	83	0	67	0
OTU4216	1	17	14	0	17	1	1	17	23	0	0	1	0	0	2	3	0	1	0	1	2	12	1	0	1	3	1	0	0	21	60	0	1	1	0	0	47	0	46	46	135	16	0	8	1	0	109	76	0
OTU422	61	75	1	18	34	34	1	26	38	35	12	2	15	43	42	74	42	0	5	35	15	3	7	58	1	60	1	1	2	0	2	52	68	2	3	19	0	2	35	123	0	2	48	2	2	0	95	1	0
OTU423	0	1	7	15	0	7	13	0	0	1	0	0	19	33	0	2	26	1	0	0	24	11	0	0	0	1	0	62	5	46	0	0	76	0	0	0	0	0	0	0	0	0	0	0	26	0	0	40	1
OTU424	20	5	28	3	6	9	15	18	3	3	0	3	8	20	7	43	26	0	9	12	0	0	10	44	43	0	0	22	3	0	0	182	1	0	1	28	39	18	0	0	0	0	270	0	5	0	0	0	0
OTU425	19	37	48	14	22	30	20	10	5	18	32	18	16	0	20	1	50	32	33	3	11	1	0	93	22	32	0	47	8	17	0	31	15	98	0	2	34	56	48	60	105	29	13	14	42	56	16	54	46
OTU426	3	20	27	19	8	20	28	24	32	10	9	1	0	55	34	46	115	29	1	1	18	62	0	67	0	2	93	2	17	86	49	0	78	35	2	1	3	24	1	23	1	105	0	71	17	47	0	2	78
OTU427	24	49	16	29	7	7	27	0	0	0	0	0	0	0	0	0	0	0	0	0	0	0	0	0	0	2	0	0	0	0	0	0	0	0	0	0	0	0	0	0	0	0	0	0	31	0	0	0	0
OTU428	4	0	23	34	17	14	0	35	13	0	0	0	0	1	0	1	0	23	78	1	2	0	10	16	0	0	2	1	8	1	0	0	2	0	1	0	0	2	0	1	86	1	0	1	1	0	0	1	28
OTU4284	20	0	0	25	20	0	0	0	0	0	0	0	0	0	0	37	0	0	0	0	0	0	0	1	0	0	0	0	0	28	0	0	0	0	0	0	0	42	0	0	0	0	0	0	33	46	0	0	31
OTU4288	0	12	0	14	17	0	7	0	2	0	0	0	0	0	0	0	1	0	0	0	0	0	0	19	0	13	1	0	0	0	0	35	0	0	0	0	0	0	0	0	0	0	1	75	14	0	20	0	0
OTU429	0	2	14	0	0	0	1	0	3	0	0	3	6	12	30	48	7	0	9	8	0	21	15	0	36	6	0	0	18	2	0	0	27	20	2	14	12	13	58	60	16	12	0	17	18	0	1	4	24
OTU43	500	400	395	361	349	457	425	341	358	56	99	98	97	322	140	385	409	606	300	290	249	220	176	205	250	144	303	328	589	238	365	519	371	490	484	365	317	336	351	454	489	268	252	374	177	395	542	167	342
OTU430	0	0	6	0	0	5	0	10	0	0	0	0	0	0	0	0	0	0	0	0	0	80	21	1	0	0	0	0	7	1	3	106	0	0	0	338	0	0	0	0	0	0	0	0	0	12	0	0	5
OTU4302	6	2	0	12	1	4	0	1	0	4	0	0	0	0	0	1	21	0	0	0	16	16	0	0	0	0	0	0	0	0	74	0	0	1	0	0	0	0	0	0	0	0	0	1	28	0	0	60	1
OTU431	17	0	5	7	11	7	0	0	4	0	7	0	0	1	0	0	18	0	28	0	1	8	32	0	28	0	0	0	18	0	0	58	0	0	94	0	0	1	0	0	1	8	22	2	0	50	0	32	0
OTU432	14	8	49	21	31	41	18	47	17	33	0	9	23	45	52	26	15	50	33	69	67	89	50	118	159	43	221	47	123	257	24	47	50	112	71	108	47	34	108	135	59	76	185	22	105	57	86	1	55
OTU4322	0	1	5	0	0	4	1	2	0	0	1	0	0	0	1	0	0	0	0	2	0	72	1	0	50	1	1	0	12	0	0	0	0	0	0	0	0	0	0	0	39	0	0	0	0	0	0	0	0
OTU4325	1	1	0	2	0	9	11	10	0	10	28	2	0	10	19	28	23	31	0	0	1	0	1	0	0	2	24	0	0	0	87	1	20	43	39	0	1	0	0	1	0	0	45	0	0	2	0	0	1
OTU433	0	0	13	29	25	19	3	0	3	1	2	3	0	2	0	0	27	1	0	1	0	22	2	1	0	2	3	45	3	4	2	2	0	55	0	24	3	3	0	77	1	31	2	0	11	0	0	20	0
OTU434	0	0	35	11	0	9	5	0	0	0	0	0	16	28	0	1	0	0	27	0	0	15	8	28	1	0	0	0	16	101	41	79	0	1	0	0	0	0	0	4	0	0	33	0	53	0	0	0	7
OTU435	9	4	24	0	10	4	1	19	10	0	0	0	0	0	0	0	1	0	0	0	0	0	0	22	0	0	0	0	0	1	0	63	0	0	0	0	1	0	0	0	0	0	0	0	0	0	0	0	15
OTU436	51	20	19	67	27	21	15	8	0	0	0	0	0	0	0	0	0	0	0	0	0	0	0	0	0	0	0	0	0	0	0	0	0	0	0	0	0	0	0	0	0	0	0	0	0	0	0	0	0
OTU437	0	20	0	0	0	6	0	0	19	0	0	4	0	0	0	0	0	0	0	52	50	0	0	24	0	0	0	29	0	0	0	0	0	0	0	0	0	52	37	0	0	0	35	0	7	0	0	0	0
OTU438	0	1	0	0	6	0	0	8	9	0	0	0	1	0	0	26	57	21	0	16	0	1	1	1	0	21	1	0	0	0	0	37	0	0	1	20	0	0	15	36	0	0	22	0	0	0	39	81	1
OTU4385	20	2	0	2	5	2	7	0	0	0	0	0	0	15	0	0	0	28	0	0	0	0	0	0	37	0	0	0	13	0	0	0	0	0	0	0	42	0	0	0	0	0	1	0	0	0	0	0	0
OTU439	6	1	0	0	9	1	5	0	0	0	0	16	4	0	0	0	1	26	0	2	24	0	40	0	0	0	0	0	0	0	62	23	1	0	65	0	0	0	0	0	0	0	22	0	30	73	1	0	22
OTU44	96	120	155	159	140	102	114	126	148	35	77	63	83	82	136	285	156	277	109	81	120	153	155	88	60	33	229	280	125	70	210	274	101	224	59	209	38	30	116	93	133	140	135	222	98	212	278	61	124
OTU440	12	17	15	7	0	0	15	43	12	2	22	0	1	0	2	0	1	62	0	0	38	2	38	0	150	0	0	34	11	50	15	32	1	46	46	0	0	2	0	37	1	10	0	0	1	29	0	0	0
OTU441	28	21	48	11	33	22	18	35	33	9	18	19	37	64	3	77	77	3	42	77	0	99	16	43	2	20	33	68	6	72	73	40	1	34	38	4	27	149	114	43	4	57	12	118	96	2	62	0	123
OTU442	28	9	1	6	0	0	0	10	3	6	0	0	0	1	35	2	1	1	24	1	0	1	1	0	1	1	42	0	10	2	1	48	0	63	0	1	2	0	2	0	53	0	40	2	2	0	0	49	1
OTU443	29	21	21	24	6	20	4	10	0	0	1	14	5	64	1	35	32	24	44	1	1	4	16	20	5	44	73	0	12	0	0	1	23	43	18	0	0	45	58	40	1	0	68	47	20	16	20	20	32
OTU4437	0	26	23	41	0	34	10	26	33	15	10	14	0	19	58	56	50	2	40	27	54	20	32	62	56	14	36	0	46	77	149	38	40	196	110	65	37	0	59	104	72	28	0	31	41	5	29	32	0
OTU444	0	6	8	5	28	5	1	0	13	0	0	1	1	20	1	80	124	0	1	0	74	10	0	0	43	32	0	0	16	9	63	0	15	25	0	0	0	64	0	0	4	1	0	2	77	1	0	32	110
OTU4447	8	10	2	5	22	0	10	6	28	0	12	1	1	19	0	0	58	2	2	0	1	1	36	6	1	0	25	2	12	0	35	12	19	0	12	19	1	0	0	24	68	1	24	18	4	7	0	3	0
OTU445	53	38	39	24	23	71	77	33	49	21	27	34	0	73	41	96	117	77	85	44	33	1	137	37	55	39	149	148	120	141	1	1	53	49	66	40	81	170	38	1	58	37	151	1	34	2	2	49	50
OTU446	0	0	0	0	3	2	14	0	9	0	29	0	29	0	29	19	0	0	0	54	0	20	0	0	10	0	39	1	0	29	0	0	21	1	0	60	0	47	1	0	0	14	44	35	11	0	0	0	1
OTU447	20	14	16	10	12	25	20	0	23	0	0	0	0	0	0	0	0	50	0	0	0	0	0	0	0	0	0	0	0	0	0	59	1	0	0	1	0	29	0	0	0	0	0	0	0	30	0	3	0
OTU448	0	0	0	0	0	0	0	1	0	0	0	0	0	1	0	0	0	0	0	0	0	12	0	0	0	0	0	0	0	62	0	0	0	0	0	0	1	40	0	3	0	0	0	0	30	49	0	0	0
OTU449	37	0	34	50	24	27	7	44	18	0	0	0	0	0	2	0	45	0	0	1	36	12	20	51	0	0	0	0	18	41	1	34	1	0	54	0	16	0	0	0	46	0	0	0	0	0	0	0	0
OTU4490	5	0	0	7	0	22	7	0	0	0	1	2	0	0	0	0	0	25	0	0	0	0	0	0	17	0	2	0	0	23	0	0	0	0	0	0	15	26	0	0	48	0	0	0	0	0	1	0	0
OTU45	273	254	253	375	289	210	283	306	274	21	37	34	1	0	75	32	46	32	12	1	1	0	40	15	183	14	34	0	19	56	2	125	30	147	1	32	75	79	48	110	29	55	57	0	23	5	4	51	5
OTU450	1	23	43	21	6	5	17	83	10	2	9	0	38	21	69	1	47	101	43	45	42	31	61	31	64	31	144	41	36	32	31	64	76	56	89	0	142	83	39	69	1	29	0	3	22	34	7	61	29
OTU4505	15	15	0	8	9	9	12	6	14	13	17	7	6	0	11	1	1	1	1	0	41	19	41	0	25	1	0	1	1	24	15	31	1	0	5	0	1	17	0	0	0	17	14	3	11	41	0	0	30
OTU451	38	21	0	13	27	25	37	14	14	12	23	4	28	74	44	81	98	105	108	60	92	46	40	18	49	16	35	35	70	27	24	25	167	91	9	96	0	17	120	64	0	21	46	40	18	64	119	90	1
OTU452	0	14	0	0	0	0	0	0	0	3	0	6	0	0	0	0	0	0	20	1	4	0	0	24	0	0	0	0	0	0	49	0	52	0	2	37	0	0	0	0	0	0	0	40	0	0	0	0	81
OTU453	0	0	0	0	2	7	0	0	0	0	0	0	0	47	17	1	19	47	0	0	1	1	0	0	44	25	0	36	5	0	0	0	0	94	0	0	0	1	0	0	64	0	0	0	0	1	0	0	0
OTU454	11	17	5	0	4	36	1	14	0	0	0	1	0	0	21	30	0	0	36	65	0	0	0	0	43	15	40	1	0	18	19	1	0	0	0	0	29	0	0	0	0	0	38	51	27	0	0	0	0
OTU455	0	0	4	0	0	1	0	15	0	13	0	0	0	1	1	51	20	0	7	0	43	0	0	17	0	0	26	2	3	30	0	0	2	0	15	1	0	26	1	70	0	0	43	15	52	0	0	70	0
OTU4554	2	7	0	0	0	12	0	3	0	0	1	0	0	15	0	34	1	2	2	2	1	1	1	0	0	0	1	0	32	1	1	1	1	0	14	3	2	0	0	0	0	0	0	0	1	0	0	0	37
OTU4558	0	15	0	3	0	0	1	15	0	0	0	0	10	1	0	0	41	0	0	37	0	0	1	0	1	0	0	0	0	0	0	37	0	0	0	0	0	0	0	0	35	0	0	1	0	0	0	0	0
OTU456	75	57	68	46	81	84	32	35	63	1	5	9	6	49	55	4	106	119	29	0	1	18	8	0	0	0	20	32	53	17	112	0	43	0	0	0	0	6	1	1	37	33	25	19	71	49	23	39	69
OTU457	44	17	22	14	35	3	2	27	18	0	0	0	0	40	2	2	0	0	19	38	0	39	30	1	0	1	0	103	11	0	30	1	48	58	0	39	0	0	97	71	0	0	0	40	1	33	18	1	0
OTU458	18	34	3	43	46	53	46	14	4	13	0	0	2	45	0	0	4	39	0	0	0	0	21	19	17	0	1	0	15	20	0	7	0	9	0	0	57	0	0	0	75	84	11	21	43	33	0	49	67
OTU459	11	6	6	32	12	35	29	6	16	45	0	2	0	2	104	56	1	1	62	88	0	0	28	0	0	43	56	91	0	35	56	0	0	2	0	0	14	0	0	0	51	0	0	0	94	1	49	2	55
OTU46	385	303	368	298	504	265	155	295	364	5	0	4	8	1	8	1	4	3	0	3	6	1	0	2	34	0	50	1	1	71	1	80	1	0	1	2	2	32	0	0	0	0	63	3	51	0	0	0	0
OTU460	0	5	2	4	5	11	0	9	20	26	2	0	41	2	48	1	79	2	1	42	41	56	26	49	1	0	0	42	38	49	30	57	62	42	26	3	19	0	32	73	1	1	0	62	24	0	0	52	1
OTU4606	0	0	0	3	0	0	0	0	1	0	0	0	7	2	0	1	0	0	1	3	57	1	1	0	0	0	0	1	12	0	0	0	1	1	0	4	2	35	0	0	0	0	25	0	22	0	0	0	0
OTU461	10	0	0	6	5	0	0	0	5	3	8	0	3	1	26	2	1	44	18	3	37	41	26	0	60	2	17	32	37	19	1	1	55	1	0	1	48	0	0	66	1	0	0	1	1	19	66	0	16
OTU4611	0	2	0	0	0	0	12	0	13	0	0	0	0	21	0	0	0	0	0	0	0	0	0	0	0	24	0	0	2	0	0	0	2	0	0	15	0	10	0	0	0	26	0	0	0	0	0	0	1
OTU462	0	0	0	0	0	0	0	10	0	1	0	0	18	1	0	0	0	0	0	96	0	0	0	0	0	0	0	0	0	0	0	79	0	0	45	41	0	3	0	0	0	0	0	0	0	0	27	0	22
OTU4620	0	14	0	0	1	3	3	0	0	0	0	1	0	0	1	50	1	0	69	0	14	0	0	1	3	0	1	0	1	0	0	0	3	0	0	0	20	40	38	0	0	17	0	0	0	0	0	1	40
OTU463	87	82	132	61	108	155	116	112	140	0	3	1	0	0	0	0	0	46	1	79	1	36	0	29	25	14	0	1	31	15	36	93	59	2	0	0	0	61	1	0	0	12	88	0	21	104	3	38	0
OTU4639	22	0	0	24	2	0	1	22	0	10	1	12	0	3	39	0	1	2	34	0	7	4	20	0	0	0	3	1	6	60	1	47	73	71	1	1	3	1	50	0	38	48	0	2	0	3	0	4	1
OTU464	0	8	34	22	21	9	37	48	75	0	0	0	1	0	0	0	0	0	0	0	0	0	0	0	0	0	0	0	1	0	0	0	0	0	0	28	0	0	0	0	0	0	0	0	0	0	0	0	0
OTU4640	0	0	0	3	0	4	0	1	0	0	0	11	0	0	0	0	0	0	1	2	1	17	24	19	0	1	0	0	27	0	50	0	0	85	0	0	9	1	0	0	2	0	1	62	14	0	0	0	46
OTU465	0	6	27	8	2	0	11	24	14	0	0	13	0	31	0	0	0	0	0	0	0	1	0	0	0	0	0	0	0	16	0	0	0	0	0	0	0	0	0	14	0	0	0	3	0	3	0	0	2
OTU466	0	40	0	26	18	23	5	7	0	0	0	0	0	0	0	0	0	0	0	0	0	0	0	0	0	0	0	0	0	0	0	0	0	0	0	0	0	0	0	0	0	1	0	0	0	0	0	59	0
OTU467	0	0	1	0	0	0	0	0	0	0	0	0	0	0	0	1	0	0	0	0	0	9	0	599	0	0	1	1	0	0	0	0	0	0	0	0	0	0	0	0	0	0	8	0	0	0	0	0	0
OTU468	22	8	7	19	33	24	35	42	11	16	18	9	13	3	18	18	10	5	12	5	123	48	6	43	2	17	0	158	18	101	98	96	125	0	59	3	32	2	87	22	3	0	42	3	46	79	129	135	68
OTU469	14	6	2	10	15	9	24	15	24	3	0	3	0	1	0	0	0	1	0	2	0	1	0	2	1	2	0	1	1	0	50	76	104	0	1	0	1	2	0	0	0	25	14	1	0	0	44	38	0
OTU47	123	74	59	52	109	46	106	84	31	60	43	30	88	87	104	131	138	247	143	214	133	35	143	143	190	87	343	242	182	199	472	267	272	158	205	192	123	188	35	193	517	90	269	150	188	224	239	196	82
OTU470	1	1	4	0	12	10	9	26	12	5	0	0	11	0	64	46	0	1	0	97	23	0	1	21	46	0	0	1	45	18	24	36	1	0	173	0	60	15	0	59	35	0	44	1	114	39	1	18	78
OTU471	14	6	21	5	18	16	15	0	19	0	0	0	10	54	0	3	1	0	32	5	0	0	0	0	0	28	0	0	0	13	0	86	0	1	16	0	0	25	1	1	17	61	27	73	26	0	0	34	28
OTU472	8	14	1	4	21	12	18	32	36	0	0	0	0	0	0	0	0	46	0	0	17	0	0	0	0	0	0	0	7	0	0	0	1	0	0	0	25	0	0	0	0	0	20	25	8	33	0	0	0
OTU4727	42	34	25	44	4	3	34	19	15	1	0	0	0	0	0	0	0	0	0	0	0	0	0	0	0	0	0	0	0	0	0	0	0	0	0	0	0	0	0	0	0	0	0	0	0	0	0	0	0
OTU4729	10	11	15	5	14	0	0	20	11	1	0	0	0	4	5	0	11	5	1	0	0	16	14	13	2	3	4	0	0	4	3	6	1	8	41	19	1	0	0	1	30	0	0	0	1	0	0	0	0
OTU473	0	0	14	0	31	0	0	19	3	22	15	4	10	35	2	3	0	1	0	0	43	1	0	81	0	0	0	0	5	0	0	0	0	32	0	0	21	2	0	0	0	16	0	29	0	47	0	0	0
OTU4734	21	10	7	20	16	0	0	0	23	0	0	0	0	0	1	0	0	0	0	0	2	0	0	0	0	0	0	0	0	0	0	0	0	67	0	0	0	0	0	0	0	0	0	0	28	0	1	0	0
OTU474	6	53	55	105	18	46	12	24	45	0	0	3	0	1	0	0	3	0	14	0	1	0	0	0	0	0	0	27	12	0	0	0	15	1	0	0	0	2	0	1	1	0	0	0	0	0	0	0	0
OTU475	11	30	27	44	10	4	33	29	55	0	7	0	13	20	39	1	43	0	2	60	0	0	26	0	28	35	16	36	10	10	0	0	0	31	0	0	0	0	0	37	38	0	0	17	26	29	155	140	41
OTU476	11	12	17	10	26	0	0	1	8	1	0	2	2	20	1	23	48	16	1	0	51	0	0	38	3	1	0	1	3	0	106	0	71	0	1	2	1	1	0	3	2	1	1	61	27	36	0	0	0
OTU477	0	46	30	0	10	17	0	10	29	0	0	1	0	0	0	2	1	0	0	0	0	0	0	0	0	0	0	0	0	0	0	1	0	0	0	0	0	0	0	0	0	0	0	0	0	0	0	0	0
OTU478	46	38	75	19	36	43	57	41	29	8	20	8	0	2	0	1	29	83	65	0	62	38	0	32	0	19	65	96	107	50	38	27	0	135	123	0	93	82	128	3	4	49	102	1	58	61	42	40	52
OTU479	6	22	7	0	0	2	13	1	0	0	0	3	1	2	5	2	8	0	2	48	3	0	37	0	0	0	0	0	2	0	0	0	0	0	0	0	0	0	0	0	3	24	0	5	21	0	0	0	0
OTU48	238	258	336	252	258	190	203	275	383	3	4	1	10	3	3	3	16	0	1	2	2	2	0	0	1	0	1	0	0	20	0	2	1	1	1	6	2	51	23	2	1	20	1	3	1	0	0	0	0
OTU480	51	23	47	89	69	41	4	58	68	0	0	0	0	16	0	21	0	0	0	0	0	26	0	0	1	0	0	2	0	0	0	0	0	0	0	0	1	9	1	0	2	1	2	19	1	3	51	0	0
OTU4803	7	20	2	9	0	1	0	0	0	0	0	1	0	0	16	2	3	46	2	1	0	1	0	1	0	0	2	0	5	56	0	1	43	0	0	2	1	34	71	0	2	0	0	2	21	45	0	0	32
OTU481	2	0	3	1	0	0	12	26	7	0	0	0	0	71	1	1	0	30	0	0	0	30	13	16	0	0	0	48	3	0	9	0	0	0	0	17	0	30	0	0	4	0	35	0	1	0	0	1	0
OTU4814	16	6	0	0	0	0	0	0	0	0	12	0	0	0	0	0	53	0	36	0	58	0	0	0	0	7	0	0	0	0	0	32	0	0	0	0	18	1	1	0	30	0	0	1	44	0	0	61	52
OTU482	3	21	0	0	1	3	19	0	23	0	0	24	16	41	0	1	0	0	1	58	0	26	0	27	0	15	19	0	12	0	0	243	1	56	129	0	24	46	25	42	202	1	40	63	27	19	234	47	0
OTU483	26	25	26	1	10	89	37	11	0	38	40	24	18	76	67	61	1	107	2	97	31	20	147	31	181	1	73	54	78	56	1	148	103	1	133	203	57	62	209	5	138	16	24	4	13	55	1	159	44
OTU484	0	0	0	0	0	0	0	0	0	0	0	0	0	25	1	0	1	1	34	0	0	0	0	0	0	0	32	0	34	0	1	0	23	65	114	0	0	0	0	0	0	0	0	0	0	89	54	0	0
OTU485	22	6	9	0	7	6	0	6	26	24	1	27	0	0	3	1	0	2	1	5	0	1	35	36	32	2	86	1	1	16	4	2	24	2	28	5	79	2	0	44	1	36	0	20	34	37	0	49	44
OTU486	155	19	150	51	29	76	23	58	26	42	2	2	24	59	199	41	59	108	5	237	93	47	219	100	39	18	63	210	163	207	183	152	233	10	9	51	49	95	108	270	7	94	190	56	97	170	102	41	45
OTU487	37	14	24	0	14	3	9	13	20	12	16	0	0	18	0	57	88	1	31	17	2	18	0	1	52	1	110	0	1	14	70	142	101	0	3	43	31	0	0	0	38	9	0	0	32	0	0	0	24
OTU488	9	2	38	18	20	8	1	21	24	0	6	3	2	0	74	0	2	34	0	0	1	0	44	0	72	22	0	0	18	32	88	26	0	33	28	9	115	7	15	2	109	1	0	78	52	34	0	39	55
OTU489	0	0	0	0	0	0	1	0	0	0	19	0	0	0	0	48	0	0	0	28	0	0	0	13	0	0	0	1	0	0	0	0	0	0	73	127	0	0	0	117	0	0	0	0	0	0	0	0	0
OTU4890	0	0	0	0	0	0	0	0	0	0	0	0	0	0	3	0	66	0	28	0	0	0	0	0	0	0	0	0	23	27	1	0	3	0	0	0	0	0	0	0	0	0	0	0	0	0	0	0	0
OTU49	17	16	35	30	16	47	26	53	52	7	75	18	30	220	239	86	151	152	36	119	65	81	156	164	36	37	155	87	132	84	108	148	96	242	254	86	47	404	355	250	128	96	66	160	177	245	11	73	118
OTU490	0	24	52	8	5	33	13	69	19	3	19	2	5	35	45	36	21	12	15	1	0	0	0	0	3	15	1	0	13	43	0	0	0	0	0	0	0	22	37	84	0	0	50	24	84	13	0	1	0
OTU491	0	12	7	10	5	15	4	15	17	0	1	0	0	11	0	0	1	0	0	0	0	0	0	0	0	0	0	0	4	0	0	0	0	0	0	1	0	0	0	0	0	0	26	0	81	0	0	0	0
OTU492	0	8	24	11	11	28	0	0	7	0	0	0	0	0	40	0	2	0	0	61	22	1	0	0	0	0	38	34	16	0	0	0	0	38	15	0	0	102	0	1	0	20	0	15	24	44	0	0	36
OTU493	0	16	10	6	0	7	2	0	0	4	6	0	0	0	0	22	0	0	0	0	0	15	0	0	0	0	56	0	0	0	0	20	0	1	0	0	0	0	44	0	0	0	105	1	0	0	0	21	1
OTU494	0	0	0	0	23	6	11	1	30	0	0	0	0	0	0	0	0	0	21	0	0	17	0	0	0	0	0	0	10	15	0	69	38	0	59	0	0	0	0	0	0	0	0	0	0	0	0	63	0
OTU4947	0	0	0	0	0	0	0	13	0	0	5	0	0	0	1	0	75	35	67	48	0	0	28	1	0	9	0	53	8	0	4	0	0	0	42	28	32	50	10	4	2	0	0	1	0	3	0	0	3
OTU495	16	34	0	0	5	0	1	0	1	0	13	21	12	86	0	24	0	30	74	6	0	12	17	63	110	12	89	157	13	0	0	0	0	39	0	2	0	40	0	58	1	0	1	0	0	0	34	0	0
OTU4959	0	0	0	20	0	0	0	13	8	0	0	0	0	0	0	0	1	2	0	0	0	43	0	0	44	1	0	0	0	0	0	0	31	0	0	1	0	0	0	0	0	0	0	0	14	0	0	0	0
OTU496	0	0	0	8	0	0	5	0	0	0	26	13	0	57	0	1	13	54	0	0	0	0	24	122	0	16	0	0	30	25	0	0	3	0	46	0	1	0	62	0	74	0	0	15	26	0	0	0	17
OTU497	10	28	38	20	23	0	37	13	0	0	0	0	0	0	0	1	0	0	0	0	0	0	24	0	65	1	0	0	0	19	0	0	0	0	24	0	0	0	0	0	0	38	0	0	0	0	0	0	0
OTU498	0	0	0	0	0	0	4	0	0	4	0	0	0	0	0	0	15	1	78	0	9	0	0	0	0	21	0	0	0	0	133	0	0	0	15	0	1	0	0	0	0	0	0	0	0	0	0	65	0
OTU499	22	17	9	0	0	2	12	18	80	0	0	0	0	0	0	0	0	0	0	1	0	0	0	0	0	0	0	0	0	0	0	0	0	0	0	0	0	0	0	0	0	0	0	0	0	0	0	0	0
OTU5	5200	5101	5760	5282	5488	4763	5135	5735	5368	30	5	18	29	56	8	181	87	8	8	27	65	83	39	160	101	30	63	139	59	22	38	56	71	22	216	63	8343	53	68	38	93	31	66	0	114	2	100	69	141
OTU50	398	333	350	497	457	278	344	420	295	1	0	5	3	1	1	0	0	0	0	2	2	2	1	0	2	1	0	1	0	49	1	0	0	0	0	0	0	0	0	0	0	0	0	1	1	0	0	0	0
OTU500	40	0	44	4	7	3	29	69	25	4	0	0	0	0	1	0	0	0	0	0	0	0	0	0	26	0	19	0	4	1	0	0	0	0	0	0	131	0	0	0	0	0	0	0	0	0	0	26	0
OTU5007	0	0	0	0	0	0	0	0	20	0	0	8	0	0	0	0	0	1	0	0	30	0	0	0	1	0	0	1	40	0	0	0	0	0	0	0	0	30	0	45	0	0	1	0	0	47	29	6	0
OTU501	0	1	12	0	0	0	0	0	0	0	0	0	0	0	47	0	50	0	0	0	0	0	55	0	0	10	0	1	0	0	0	0	0	0	0	0	0	0	0	0	0	36	27	0	0	91	0	0	0
OTU502	0	0	0	0	0	0	0	0	0	12	0	0	0	52	0	0	0	1	38	0	47	23	0	39	23	37	1	0	15	49	0	0	0	0	0	0	0	0	0	0	0	1	40	1	50	0	0	82	20
OTU5026	0	0	0	0	0	0	0	0	0	0	0	0	0	0	0	0	0	34	0	0	0	25	0	0	0	0	0	0	0	1	20	28	0	0	0	28	0	0	0	0	0	0	0	48	0	106	0	0	0
OTU5028	0	1	1	0	1	1	0	11	0	0	0	0	1	2	3	24	1	34	59	30	0	1	0	1	0	0	43	1	0	2	0	2	0	0	0	29	2	2	0	0	0	0	0	0	1	0	0	0	0
OTU503	0	24	0	8	1	15	0	4	13	0	0	0	1	0	1	0	77	0	0	1	0	0	16	0	24	0	0	1	0	0	0	0	18	1	70	0	0	0	0	0	0	0	93	0	21	0	2	0	35
OTU504	4	23	10	2	21	4	17	9	0	0	0	0	0	17	0	19	14	0	0	0	0	0	0	0	27	0	0	0	0	0	0	0	0	0	38	0	0	1	0	34	1	0	0	19	16	0	21	111	0
OTU505	0	6	0	0	0	3	6	0	0	6	1	19	0	1	0	1	1	37	1	1	0	1	0	1	45	0	0	100	49	0	0	19	1	0	37	0	0	20	85	45	1	0	0	31	1	0	0	0	0
OTU506	0	0	0	0	0	0	3	0	9	0	0	0	0	0	2	30	0	0	0	0	0	2	3	38	29	0	0	0	39	62	3	0	0	20	0	1	48	0	18	0	18	22	0	0	0	16	0	0	0
OTU507	6	67	5	17	19	77	39	24	82	1	0	0	0	0	0	0	0	0	0	0	0	0	0	0	0	0	0	0	0	0	0	0	0	0	1	0	0	0	0	0	0	0	0	0	0	0	0	0	0
OTU508	8	17	15	14	19	22	13	6	9	2	47	0	8	100	64	116	1	53	33	7	98	84	38	1	2	54	66	35	109	33	67	69	70	28	112	47	0	48	0	40	38	0	29	80	88	144	101	162	122
OTU5087	14	0	9	0	0	0	0	0	0	0	0	0	0	0	0	1	0	0	0	0	0	0	0	137	0	0	1	0	0	0	0	0	0	0	0	0	0	0	24	0	0	0	0	17	12	5	0	0	0
OTU5089	12	9	27	11	2	0	7	6	13	1	4	3	1	2	1	4	1	0	25	1	2	18	15	4	0	0	1	39	33	8	2	0	0	13	0	26	0	0	10	0	1	5	23	11	15	1	0	2	0
OTU509	0	0	0	6	0	0	10	0	0	7	0	0	0	0	0	0	2	48	0	68	30	0	0	27	0	0	1	0	0	0	0	0	0	1	0	36	19	0	0	0	0	49	0	54	26	20	0	21	0
OTU5093	13	11	12	15	18	1	9	10	34	4	0	0	1	69	0	7	1	0	0	0	0	12	29	0	1	0	20	1	1	0	52	0	0	20	0	1	0	0	0	0	57	0	0	0	3	25	15	0	0
OTU51	99	209	128	138	146	148	110	124	71	9	17	19	55	209	56	75	120	158	161	86	152	98	115	264	147	9	123	69	46	259	283	38	1	160	279	48	69	110	39	45	7	93	462	29	160	122	154	98	133
OTU510	35	1	6	0	7	1	23	17	14	1	0	1	0	2	0	1	0	0	0	0	9	18	5	0	0	12	0	56	6	0	51	136	16	0	17	89	0	15	34	0	32	0	60	1	1	0	0	0	0
OTU5102	53	51	54	81	55	66	36	54	117	1	4	21	5	1	19	0	0	1	1	40	0	10	1	0	29	18	80	1	11	0	33	0	0	0	44	0	0	41	0	0	0	0	0	0	0	0	13	0	0
OTU511	21	0	9	0	15	0	7	0	10	1	0	0	0	0	34	0	0	0	0	0	0	0	0	26	14	0	0	50	5	0	25	0	0	0	0	0	0	1	86	0	47	0	0	21	0	0	0	0	31
OTU512	0	0	13	6	0	0	0	0	7	1	0	0	0	2	29	3	68	0	0	0	0	0	0	0	0	1	0	46	9	0	1	0	0	47	0	0	0	0	0	0	0	1	0	0	16	51	0	0	0
OTU5124	52	0	13	68	12	74	41	19	21	0	13	5	17	2	0	115	0	21	50	1	0	0	0	0	55	17	0	44	2	49	0	37	7	1	0	63	14	26	0	0	43	40	38	0	0	0	15	23	1
OTU513	14	8	11	0	6	15	16	1	0	1	1	1	0	15	1	2	24	35	129	0	80	20	0	39	17	26	116	23	4	0	0	12	3	29	103	0	0	0	0	34	0	0	0	0	1	24	29	0	25
OTU514	0	8	42	14	12	29	61	47	16	7	1	1	1	8	1	1	2	1	0	47	60	63	0	18	57	35	3	44	52	1	128	2	0	1	0	1	0	110	19	2	36	3	2	30	51	1	0	102	30
OTU515	24	7	4	0	7	3	22	0	16	0	0	0	1	0	0	0	0	0	0	0	0	0	0	0	0	0	0	0	0	0	0	0	0	0	0	0	0	0	0	0	0	0	0	0	0	0	0	0	0
OTU516	0	14	17	0	0	3	0	10	0	9	0	1	1	0	1	22	84	0	0	72	52	1	12	26	0	3	0	0	3	37	0	0	54	1	0	0	41	1	25	2	1	0	41	0	34	3	5	87	53
OTU517	0	0	9	0	0	0	0	26	16	0	0	0	0	34	28	0	0	23	0	58	1	0	18	0	0	0	0	0	0	0	0	0	42	84	0	0	0	0	0	0	0	0	51	36	0	0	0	1	0
OTU5172	0	0	1	0	1	0	1	2	0	0	0	16	0	0	1	38	18	0	33	0	1	0	0	0	0	16	0	0	72	0	0	0	0	31	47	0	0	0	0	0	89	0	0	0	0	0	1	0	0
OTU518	3	0	0	0	0	1	1	0	0	0	0	0	10	7	0	5	0	0	24	0	28	0	0	0	0	10	0	9	2	0	0	9	24	0	0	0	29	16	0	0	27	0	0	0	0	19	11	0	62
OTU519	33	7	22	27	34	45	10	28	8	18	0	1	8	33	36	20	38	63	45	10	39	44	53	26	47	22	2	3	65	148	1	83	1	0	27	35	4	41	12	76	2	8	108	5	55	53	46	0	2
OTU52	9	26	94	62	45	11	28	33	27	19	19	30	60	147	104	144	143	214	179	226	99	122	41	102	152	30	171	224	138	57	168	164	191	307	183	168	181	25	196	178	394	166	209	206	60	184	204	257	142
OTU520	55	40	29	39	45	40	39	76	8	5	13	14	13	4	51	85	3	67	0	58	4	21	39	82	26	20	23	126	4	49	38	38	1	191	0	60	10	59	58	9	95	38	111	38	80	11	0	59	69
OTU521	83	29	36	43	5	35	43	31	43	22	0	0	15	3	32	1	1	27	1	67	0	1	55	11	52	2	0	50	23	0	0	2	96	1	1	56	0	29	29	0	1	46	49	51	0	0	0	39	0
OTU5215	20	9	8	0	0	1	0	3	0	0	0	0	0	46	0	0	0	33	0	31	0	33	0	0	0	0	0	0	0	0	0	0	0	0	0	0	0	0	0	0	0	0	0	62	0	0	0	28	0
OTU522	9	0	7	5	3	29	4	6	0	0	0	0	0	1	60	0	0	0	0	1	22	0	91	0	0	10	0	0	0	0	0	0	0	0	213	621	0	35	0	0	0	31	1	25	11	0	0	0	0
OTU523	10	12	5	0	0	0	0	0	29	0	0	0	0	0	0	0	0	0	0	0	38	0	65	0	0	0	41	0	3	0	1	0	0	0	0	0	68	19	0	1	0	0	0	0	1	0	0	36	0
OTU524	10	0	0	0	13	6	6	1	0	0	10	0	0	12	1	32	26	30	1	1	10	0	0	0	0	0	0	0	22	25	0	68	0	0	66	0	0	29	0	0	0	0	48	1	0	0	0	46	0
OTU5249	0	0	2	0	0	0	0	0	2	0	0	0	0	0	2	46	0	0	0	0	0	0	1	0	1	1	0	1	0	2	96	1	0	0	1	2	0	0	0	1	0	9	1	0	0	0	0	26	2
OTU525	25	0	1	14	0	2	3	5	0	12	7	0	0	2	2	2	6	33	2	4	1	2	1	0	0	41	1	1	37	0	2	0	0	46	0	1	1	87	33	0	2	23	32	25	102	0	0	0	33
OTU5252	2	0	6	0	0	0	0	0	3	0	1	2	4	0	0	38	0	0	0	0	0	0	16	0	0	0	12	0	0	0	26	35	0	0	0	0	0	0	0	0	45	0	0	0	0	29	0	21	0
OTU526	37	15	30	2	18	28	32	10	5	0	7	3	0	0	28	0	0	32	29	12	0	0	13	0	0	1	0	24	4	18	46	0	0	32	0	15	0	20	0	35	1	27	1	12	0	24	0	0	51
OTU527	0	0	2	0	0	0	0	10	0	0	0	0	0	0	0	0	0	13	0	0	0	0	0	0	0	1	0	54	0	0	0	35	0	0	0	0	20	0	0	0	0	1	0	0	0	0	94	0	0
OTU528	7	24	0	7	10	10	13	8	18	0	0	0	0	41	25	0	0	0	0	0	22	0	21	12	0	0	26	35	0	2	0	0	0	1	64	43	0	0	0	0	37	17	0	0	0	1	0	0	0
OTU5287	0	27	0	19	12	50	0	6	36	0	6	0	0	20	0	62	0	28	28	0	1	1	0	0	49	0	19	0	0	0	0	0	76	0	1	0	1	1	0	99	0	3	1	2	0	0	0	0	30
OTU529	0	1	3	37	14	0	4	0	0	0	0	2	0	0	0	0	0	0	0	74	0	47	0	0	0	0	47	8	13	10	16	0	115	0	0	28	0	0	0	0	2	0	0	17	0	0	0	0	23
OTU53	224	136	127	68	180	127	189	150	78	33	9	38	42	64	1	118	183	27	49	124	13	115	98	45	5	32	82	117	28	20	105	93	121	282	63	146	71	93	81	1	37	84	144	146	145	156	31	101	16
OTU530	0	0	0	0	0	16	0	14	12	0	19	9	0	0	0	3	3	0	20	0	2	1	0	0	2	15	18	0	0	0	0	4	0	57	0	1	0	1	0	0	42	0	0	10	10	0	0	15	29
OTU531	65	55	19	9	28	46	41	30	12	6	18	0	2	10	18	3	0	4	17	0	1	1	22	29	33	1	0	1	49	25	0	24	1	1	0	18	0	0	73	29	0	3	0	3	5	0	1	0	0
OTU532	9	3	0	0	0	7	16	5	13	0	1	0	0	0	10	0	4	1	0	0	1	0	0	0	0	11	60	0	8	0	0	0	0	0	0	0	0	5	0	1	2	0	0	0	0	0	0	0	1
OTU5324	0	5	0	0	0	14	0	0	10	0	0	0	0	0	1	0	0	0	24	0	0	0	0	0	3	0	0	1	0	0	41	0	0	0	0	1	30	0	0	0	0	0	0	30	0	0	0	37	0
OTU5328	11	1	0	2	5	1	3	8	0	0	1	0	0	2	42	1	1	0	6	44	0	0	43	2	1	1	5	1	12	30	0	1	42	0	0	1	0	12	19	59	82	17	1	0	21	8	51	0	56
OTU533	0	1	15	25	23	70	14	24	17	11	1	2	0	4	99	59	27	3	0	1	1	3	36	58	73	39	4	67	29	53	40	68	46	2	1	75	37	67	139	40	72	34	27	0	0	0	0	0	42
OTU5332	0	0	0	0	10	1	0	0	0	0	0	0	0	1	2	27	0	23	0	0	72	14	4	47	0	0	0	0	1	0	0	0	0	0	0	0	0	0	0	0	0	0	0	0	0	24	1	67	40
OTU534	19	0	0	0	11	0	10	18	0	10	8	0	11	0	0	0	45	42	0	0	0	0	0	5	61	7	0	0	8	13	39	26	2	37	25	53	38	1	45	29	126	0	33	24	15	0	55	0	28
OTU5342	12	0	0	9	31	21	3	1	0	0	0	0	0	0	0	0	0	0	0	0	0	0	0	0	0	0	0	0	0	0	0	0	0	0	0	0	0	0	0	0	0	0	0	2	0	0	28	0	0
OTU5346	0	0	0	1	0	0	1	0	0	0	10	0	0	1	1	0	0	0	0	1	0	0	0	0	0	11	0	0	2	0	0	0	0	10	0	0	0	1	1	1	7	0	16	0	0	0	0	35	0
OTU535	0	1	0	0	0	0	0	0	0	0	0	0	0	0	43	3	0	41	0	39	0	0	0	0	0	0	5	2	2	0	0	0	2	0	0	29	49	0	0	29	28	0	0	0	0	0	0	1	0
OTU536	2	16	47	6	8	35	10	22	7	0	0	0	0	0	0	0	0	0	0	0	0	0	0	0	0	0	0	0	0	0	0	0	55	0	0	0	0	0	0	0	0	0	0	0	0	0	0	0	0
OTU537	23	0	8	3	12	23	37	0	0	0	0	0	0	0	0	0	0	0	0	1	0	0	0	0	0	0	0	1	0	0	0	0	0	0	0	0	0	0	0	0	0	0	0	0	0	0	0	101	0
OTU538	0	4	0	0	0	0	0	6	0	0	0	0	21	0	0	0	0	0	0	0	0	0	0	0	0	0	40	0	0	44	0	0	0	0	0	21	0	0	90	0	0	0	11	0	0	109	0	0	32
OTU539	0	0	7	0	2	13	10	0	9	6	0	1	14	63	18	1	0	0	31	0	60	0	9	46	0	0	0	0	3	56	0	0	34	0	0	0	0	1	24	69	0	0	46	30	0	38	0	0	1
OTU54	281	252	220	253	161	273	151	184	142	1	2	0	1	0	1	1	25	0	0	0	0	0	0	6	18	0	0	0	8	0	2	58	0	1	1	1	0	31	0	29	0	0	0	0	10	0	0	0	0
OTU540	13	43	45	7	14	41	7	56	24	0	0	0	0	0	0	0	9	0	0	0	0	0	0	0	0	0	0	0	0	4	0	0	0	0	9	0	0	0	0	0	0	0	0	0	0	0	0	0	0
OTU541	14	0	0	0	15	8	6	2	9	7	0	14	9	6	81	132	94	69	60	13	72	23	59	99	49	20	30	2	30	4	30	105	2	1	44	4	205	106	1	71	78	18	29	1	15	0	83	7	33
OTU542	0	1	14	0	0	11	4	1	2	1	1	2	0	26	17	5	28	55	1	37	0	3	0	22	0	1	0	35	0	3	55	76	70	0	52	3	2	3	0	0	54	0	4	0	1	0	76	0	74
OTU543	27	17	3	12	0	43	0	14	7	18	0	2	1	41	0	2	46	2	2	26	0	31	22	0	17	8	2	50	23	27	30	1	0	3	2	1	15	31	3	5	1	20	49	55	23	17	1	1	15
OTU5431	69	10	44	46	54	47	28	76	63	7	0	0	6	28	0	0	1	0	0	0	0	1	0	0	2	0	0	0	0	0	0	1	73	0	15	0	0	0	0	0	0	0	1	0	0	0	0	0	0
OTU544	9	11	21	19	9	0	5	8	31	0	0	1	10	0	0	2	0	0	0	0	0	0	0	0	0	0	0	0	0	0	0	0	33	0	0	0	0	0	0	0	0	0	0	0	31	28	0	0	0
OTU545	2	34	0	0	0	16	7	1	0	0	1	0	15	0	0	0	0	0	1	0	1	16	33	0	35	0	0	0	0	0	27	0	0	0	68	0	0	28	0	0	15	0	0	0	1	24	0	40	33
OTU546	14	25	18	0	8	3	1	11	37	0	0	0	0	10	0	0	0	0	0	0	0	0	0	0	0	46	1	0	0	0	0	0	0	0	0	0	0	0	1	0	0	0	0	0	0	0	0	0	0
OTU547	34	78	38	47	50	36	2	11	13	0	0	0	0	0	1	0	0	1	0	0	0	0	0	0	0	0	0	0	0	0	0	0	0	0	1	0	0	0	0	0	0	0	0	0	0	0	0	0	0
OTU548	16	0	34	8	0	2	17	7	6	1	0	0	0	35	29	23	0	0	0	1	0	0	15	0	0	0	1	4	10	23	1	18	1	1	0	2	2	0	0	1	0	0	1	0	0	0	3	39	74
OTU5484	13	20	12	0	7	11	0	14	12	1	5	1	8	19	89	19	16	48	46	89	1	0	64	43	39	14	56	2	78	77	3	29	74	32	47	39	52	42	13	33	37	12	31	2	22	25	20	46	0
OTU549	0	12	13	20	0	2	3	1	0	0	1	6	1	3	1	36	0	0	0	4	2	1	1	0	0	24	3	0	12	1	0	0	1	2	0	4	0	0	0	0	0	0	81	0	0	0	0	0	1
OTU55	181	126	144	94	122	104	99	98	131	22	9	10	0	16	52	14	46	34	172	2	20	47	39	127	41	42	40	105	49	121	63	27	46	26	188	31	21	79	66	66	24	64	12	3	64	91	71	256	2
OTU550	26	3	8	3	15	13	17	0	21	11	0	0	8	0	1	0	0	0	0	0	0	7	0	34	0	0	75	20	0	14	0	0	0	0	0	0	57	0	0	120	6	0	25	0	0	0	0	37	0
OTU5509	0	5	0	2	19	4	0	0	0	0	0	0	0	0	1	1	0	0	30	0	0	0	22	0	1	0	0	0	0	0	16	1	40	0	0	0	0	0	0	28	0	15	0	0	14	0	21	0	23
OTU551	0	0	0	0	0	0	1	0	0	0	0	1	0	0	0	0	0	0	0	0	0	0	1	0	0	0	0	741	0	0	0	0	0	0	0	1	0	0	0	0	0	0	0	0	0	0	0	0	0
OTU552	9	22	11	10	4	6	17	0	2	0	0	1	1	48	23	48	73	0	0	0	42	51	59	0	20	0	0	2	25	111	31	36	97	28	53	13	0	23	15	92	0	1	74	31	73	16	0	35	0
OTU553	10	0	24	0	0	0	4	0	0	0	0	0	0	0	0	0	0	0	25	58	0	0	46	0	0	0	0	0	0	1	0	0	0	0	0	510	0	0	0	1	0	0	0	0	0	0	0	0	0
OTU5533	12	0	4	0	0	5	6	0	0	0	15	0	0	0	0	0	44	1	31	0	0	19	0	0	1	0	3	0	0	2	4	0	0	30	39	0	29	0	1	0	0	19	0	2	0	0	90	4	0
OTU554	0	0	0	0	0	0	0	11	0	0	19	0	0	0	21	0	0	0	0	0	0	0	0	0	46	0	0	0	0	27	0	0	0	0	0	0	0	1	0	0	64	0	0	0	0	1	0	0	19
OTU555	3	14	1	1	6	3	2	1	14	1	0	0	0	0	0	4	38	0	25	0	48	0	1	6	21	0	0	0	0	0	0	0	0	0	0	0	0	0	25	0	0	0	0	0	0	0	1	12	2
OTU5559	0	0	0	0	1	0	0	0	0	14	0	0	0	0	0	0	0	104	0	0	0	0	0	0	0	26	0	0	0	23	0	0	0	48	0	0	19	0	0	1	1	14	0	0	30	19	0	42	0
OTU556	21	0	19	15	20	4	4	24	1	7	5	4	11	0	4	24	0	1	18	0	0	0	3	0	0	0	20	0	29	0	41	19	0	1	21	0	0	15	27	0	33	11	0	3	35	49	63	0	0
OTU5568	0	6	0	0	16	4	0	0	0	0	2	1	0	0	1	0	0	0	0	0	33	0	0	0	33	0	0	0	13	0	0	0	0	0	0	0	0	0	91	1	0	21	0	0	22	0	0	0	0
OTU557	10	0	0	3	0	7	0	8	0	0	0	0	0	0	2	0	22	0	0	28	0	0	1	0	0	0	0	0	0	40	0	36	0	0	0	0	0	1	0	0	0	0	0	0	0	59	0	0	0
OTU5579	7	0	0	14	5	10	0	0	0	1	7	0	0	24	2	2	3	0	29	0	1	3	0	0	1	27	100	98	18	88	0	0	1	1	1	101	0	99	0	0	0	10	0	1	8	0	16	1	0
OTU558	0	0	16	0	7	5	29	1	0	0	0	0	0	0	113	51	0	44	1	0	21	41	0	11	1	0	0	1	9	0	40	1	54	0	48	1	0	0	0	1	20	0	26	32	77	0	109	32	32
OTU559	6	16	0	0	0	43	4	26	9	4	1	13	1	1	1	1	63	2	0	0	0	0	0	0	0	12	0	0	0	0	0	0	0	0	0	1	42	0	0	91	1	0	0	0	26	0	0	0	59
OTU56	111	59	73	8	105	91	46	96	86	72	51	57	151	41	77	178	156	155	375	175	172	97	99	179	198	148	166	201	313	87	324	167	465	304	227	296	162	238	413	396	118	87	248	99	86	258	169	191	225
OTU560	21	21	0	2	13	41	20	11	15	0	1	0	35	11	1	4	0	0	0	0	0	33	0	1	0	0	0	0	5	0	0	0	0	0	37	1	0	0	0	0	34	0	0	0	24	54	173	0	0
OTU5607	0	0	0	0	3	0	1	7	1	0	0	0	0	0	0	1	1	1	0	0	1	0	0	0	0	0	0	0	9	0	0	0	0	99	0	0	0	62	0	57	0	0	0	0	16	1	35	0	0
OTU561	50	19	22	7	24	0	1	17	12	0	0	0	0	2	0	0	0	0	0	0	0	0	0	0	0	0	0	0	0	0	0	0	0	1	0	27	0	0	0	0	0	0	0	0	0	0	0	0	0
OTU5617	0	0	0	0	1	16	0	0	1	23	1	17	0	28	0	2	38	30	24	1	0	21	0	18	22	0	21	2	9	0	0	0	0	5	1	0	11	59	66	22	1	20	30	0	22	34	1	96	24
OTU562	4	6	0	4	0	0	0	2	0	6	0	6	8	21	21	4	0	0	0	1	13	73	43	19	1	13	52	27	35	58	146	0	0	1	43	2	0	1	1	73	0	22	34	24	47	0	0	83	33
OTU563	18	30	8	13	8	43	7	43	0	0	0	0	1	0	28	0	0	1	0	38	51	28	0	0	36	0	43	51	0	41	0	48	0	0	0	0	0	1	0	0	0	30	1	4	1	33	0	0	0
OTU564	0	8	15	0	8	10	7	0	19	0	0	0	0	229	0	1	41	0	52	25	70	6	0	0	40	0	8	2	0	16	0	0	0	0	1	0	27	0	0	48	1	28	0	0	29	0	36	26	0
OTU565	14	1	0	6	24	7	14	13	0	0	1	0	1	1	1	0	8	0	2	1	1	0	1	13	1	0	63	0	21	39	0	0	1	103	1	0	25	41	0	9	0	0	33	0	0	0	41	0	47
OTU566	7	0	0	3	0	0	2	9	0	0	0	6	0	0	0	0	0	0	0	1	20	0	32	67	0	0	0	0	0	0	0	89	0	1	0	0	21	0	0	0	0	0	0	0	0	0	0	0	42
OTU567	0	0	7	0	0	0	7	6	2	13	0	0	0	0	0	0	1	0	0	0	0	0	0	0	0	19	0	0	4	0	15	1	0	0	0	0	14	2	35	0	0	50	15	0	27	15	0	38	0
OTU5673	18	0	0	0	0	4	0	0	0	17	0	1	0	6	0	0	5	42	0	0	1	26	1	3	0	0	27	21	0	0	94	2	1	4	0	0	2	0	0	0	0	0	0	0	18	29	0	28	0
OTU568	14	12	34	74	4	14	48	33	13	0	0	0	0	1	1	0	0	0	0	0	0	0	0	34	22	0	0	0	0	0	0	0	0	0	0	0	0	0	0	0	0	0	0	0	0	0	0	0	0
OTU569	0	10	0	12	8	0	2	33	10	0	0	17	0	0	13	28	6	1	0	0	0	60	18	0	35	31	27	0	0	0	0	0	22	21	0	0	0	1	44	0	0	0	0	0	0	0	0	0	0
OTU5691	0	1	0	0	0	0	6	3	0	0	0	1	0	1	0	0	1	1	0	0	11	21	1	0	5	0	0	1	0	0	0	49	69	1	0	1	0	0	0	51	0	0	0	0	0	0	0	0	0
OTU57	940	844	1097	1090	1010	1011	1027	901	802	11	3	11	6	23	5	8	19	7	2	7	2	3	2	0	3	1	2	2	26	53	3	74	59	32	2	1	25	4	2	55	57	41	1	2	7	0	0	1	0
OTU570	3	0	6	2	13	1	2	2	1	14	1	0	0	2	22	2	3	0	0	0	2	0	0	1	3	0	52	1	0	0	0	0	0	0	0	0	0	0	0	0	0	0	44	0	1	0	0	41	0
OTU5704	6	8	42	9	21	15	22	17	18	0	0	0	0	1	6	2	2	0	36	0	2	10	1	3	1	2	1	0	17	2	0	0	1	24	1	1	1	0	0	0	0	1	1	2	0	0	0	0	0
OTU571	31	10	15	1	0	0	17	11	18	0	12	13	5	0	1	0	40	0	28	27	62	0	0	1	21	1	0	1	23	0	0	27	55	116	76	1	15	0	0	1	71	52	1	1	15	2	4	0	0
OTU5716	0	0	0	3	0	0	0	0	15	0	0	1	0	1	1	48	36	1	0	1	2	0	0	0	2	0	0	0	2	0	0	2	0	0	0	0	0	0	0	0	82	0	0	0	0	0	0	0	26
OTU572	4	2	1	0	12	36	17	5	0	5	16	0	0	19	0	86	1	5	39	41	22	0	0	17	0	0	0	0	58	37	65	0	0	113	30	1	29	1	0	26	1	24	101	27	29	30	0	0	0
OTU5721	17	0	15	7	31	17	8	14	20	0	0	0	0	0	1	0	74	0	0	0	0	0	1	0	0	0	0	1	0	0	0	0	1	23	0	0	478	0	0	0	0	0	18	0	0	0	0	0	0
OTU573	22	10	6	13	9	4	20	11	29	2	8	4	4	42	21	26	52	25	54	61	16	0	33	12	1	0	3	0	19	28	2	2	43	33	43	150	24	0	99	39	1	34	0	23	43	31	15	0	2
OTU574	0	0	10	0	0	0	0	12	14	1	0	6	0	0	0	0	28	0	0	3	0	0	9	0	0	0	30	0	11	0	0	0	0	93	0	0	0	0	0	0	0	68	0	0	0	0	0	75	0
OTU5740	0	0	0	0	1	0	6	0	0	0	0	0	10	0	0	0	0	0	0	0	20	0	14	0	0	1	0	49	16	8	0	0	0	0	0	0	0	0	0	0	2	0	0	0	11	33	27	0	45
OTU575	0	4	0	0	0	2	3	0	0	0	8	0	0	1	10	0	10	0	23	24	0	0	0	50	0	0	0	25	9	0	117	0	0	0	0	0	0	0	0	0	55	66	0	0	0	0	0	0	0
OTU576	33	6	7	0	0	23	0	1	0	0	0	0	0	0	0	0	2	0	0	0	0	0	0	1	1	0	0	0	0	0	0	0	96	0	51	0	0	0	0	0	1	23	0	0	0	0	0	0	0
OTU577	65	24	26	45	102	38	36	17	41	24	0	0	0	38	27	3	1	0	0	0	17	0	3	0	20	3	1	41	78	74	0	38	0	0	0	1	0	35	29	0	0	70	2	32	76	113	31	1	2
OTU578	0	0	0	0	0	11	0	0	0	5	0	6	6	0	1	0	0	0	20	0	1	0	0	0	0	58	0	1	0	0	54	80	0	0	0	40	0	0	16	0	58	0	44	1	31	0	0	0	0
OTU579	11	49	0	5	16	7	6	39	5	0	0	0	0	1	0	0	0	0	0	1	0	0	0	0	0	0	0	0	0	0	1	0	0	0	0	0	0	47	0	0	0	0	0	0	0	0	0	0	0
OTU58	299	153	115	249	186	208	146	147	289	23	5	8	11	36	84	11	121	90	37	55	76	22	31	1	84	50	70	94	42	84	95	39	1	78	0	0	9	2	36	31	61	74	57	54	135	54	8	22	75
OTU580	0	10	20	3	9	12	0	16	32	14	0	9	18	0	0	0	3	28	62	116	16	19	0	18	66	0	0	62	21	7	0	6	36	32	0	0	62	58	0	26	14	0	3	0	0	0	0	0	52
OTU5802	0	0	0	0	0	0	0	0	0	0	0	1	4	24	0	15	0	0	0	0	12	0	0	0	0	17	0	0	13	7	24	0	0	88	0	0	0	8	0	0	0	61	8	50	0	0	0	0	0
OTU581	35	71	26	17	33	78	50	46	16	7	2	1	2	66	3	32	0	0	29	1	1	2	4	1	2	2	2	1	14	26	42	0	2	0	0	0	0	0	1	0	1	0	1	0	39	0	25	0	0
OTU582	0	0	0	0	0	0	11	0	0	0	8	0	0	0	0	40	1	0	0	21	0	0	20	59	0	0	0	3	0	59	40	0	3	0	0	0	0	0	0	0	0	0	0	0	0	42	0	0	0
OTU583	15	2	0	19	0	1	22	7	0	8	0	0	8	19	0	0	0	0	0	0	0	26	12	17	0	0	1	0	5	0	1	0	0	0	0	0	0	0	0	0	0	0	0	0	0	0	0	0	0
OTU584	37	22	61	5	57	8	4	5	0	1	0	0	0	0	1	1	12	0	0	0	0	0	21	0	0	0	1	0	0	0	0	1	0	0	0	19	0	9	0	1	2	2	0	0	1	1	0	0	1
OTU5848	0	0	0	0	2	0	0	8	0	0	0	0	0	0	18	0	0	0	0	0	0	0	0	0	0	0	0	0	0	1	0	0	36	0	43	60	24	2	0	0	0	1	20	0	19	0	0	0	1
OTU585	16	0	0	0	19	41	14	8	5	0	14	15	0	74	43	2	3	1	2	48	0	0	2	2	46	2	8	1	43	1	0	25	55	3	2	41	1	2	54	1	0	1	37	0	30	17	68	0	89
OTU586	13	0	18	0	0	0	0	0	0	0	0	0	0	0	0	0	14	0	25	0	0	0	0	0	0	0	0	0	0	10	0	0	0	0	0	29	0	0	0	1	0	0	9	0	0	0	1	0	0
OTU587	58	9	39	35	32	30	26	70	39	1	13	2	15	1	1	46	39	2	0	1	0	25	52	2	0	16	1	0	3	19	86	0	1	0	85	0	26	21	0	0	77	0	0	2	2	0	135	0	0
OTU588	49	28	49	13	24	54	43	36	34	2	0	3	17	11	0	2	1	0	37	0	42	17	17	17	24	21	0	0	18	29	0	100	0	2	10	77	0	78	56	1	1	12	29	13	57	64	147	14	0
OTU589	0	0	9	0	0	0	0	0	0	0	0	1	0	0	0	0	0	0	47	0	0	0	0	0	0	0	0	0	0	0	0	0	0	0	0	0	0	0	0	0	0	0	0	0	32	0	0	0	0
OTU59	0	0	0	0	0	0	0	0	0	0	0	0	0	0	0	0	0	0	0	0	0	0	0	0	0	0	0	0	8	0	0	0	0	0	0	0	0	2	0	3	0	0	0	0	0	22	19	21	0
OTU590	0	0	18	9	0	0	2	5	3	4	16	5	0	15	1	19	1	0	0	0	59	0	0	0	0	25	0	21	5	0	0	0	0	0	88	19	19	3	42	0	0	0	0	0	0	0	31	0	0
OTU591	31	0	0	18	12	0	2	59	15	0	0	0	0	0	1	0	0	0	0	0	0	0	0	1	0	0	0	0	0	0	0	0	0	0	0	0	0	0	0	0	0	0	0	0	0	0	0	0	0
OTU592	5	4	19	34	51	26	27	6	47	0	0	1	0	0	0	0	0	0	0	0	0	0	0	0	0	0	0	0	0	0	0	0	0	0	0	1	0	0	0	0	0	0	0	0	0	0	0	0	0
OTU5921	0	0	0	0	0	0	0	0	0	6	0	0	0	0	1	0	11	0	14	16	0	31	1	72	112	1	0	0	2	24	2	31	0	1	0	85	0	0	0	0	0	0	0	1	0	50	0	1	0
OTU593	1	0	6	8	5	0	0	52	0	18	0	0	0	37	0	0	1	44	0	0	0	0	92	0	0	0	39	52	0	25	0	0	0	66	0	101	0	0	0	0	56	0	1	1	0	117	0	0	34
OTU594	7	5	0	0	0	39	0	0	0	5	0	0	1	2	0	0	0	41	1	0	0	0	0	29	0	0	0	89	14	0	0	0	0	0	19	0	0	0	1	0	0	27	79	0	6	45	0	38	0
OTU5945	5	22	14	19	7	7	0	0	5	10	0	0	2	3	0	0	0	52	25	0	27	0	27	0	1	0	31	0	2	61	45	0	0	1	0	0	63	0	71	3	1	19	0	0	13	36	0	1	21
OTU595	0	0	0	0	7	4	3	0	0	20	6	0	1	0	0	47	19	26	25	0	0	0	0	24	0	0	0	31	0	0	0	0	0	0	67	22	0	0	0	0	0	0	0	22	0	4	59	15	0
OTU596	14	0	33	2	1	9	2	4	61	38	0	4	12	2	1	1	34	5	2	1	1	25	10	52	3	2	1	47	7	29	1	81	102	3	2	1	0	0	0	7	3	23	0	0	53	0	0	1	75
OTU5968	3	26	0	24	0	15	6	0	14	0	0	16	1	18	0	0	0	0	1	0	0	0	0	0	0	0	6	0	25	0	0	4	0	47	64	0	19	0	0	1	0	10	0	27	0	0	16	29	0
OTU597	0	0	0	0	0	22	0	0	3	0	0	0	1	0	0	1	7	0	0	32	0	1	13	0	0	0	0	34	0	49	30	0	0	0	66	0	0	58	20	41	0	0	0	0	15	41	0	0	22
OTU598	1	0	8	17	0	0	0	1	4	1	0	0	16	10	16	28	0	0	0	18	0	16	28	31	0	1	52	29	10	0	0	33	0	66	21	59	35	1	0	3	0	0	8	49	38	52	85	0	0
OTU5980	0	0	11	0	0	11	3	0	0	4	0	0	0	0	33	0	0	1	1	0	0	33	87	0	0	2	0	0	0	29	0	0	0	0	0	0	0	17	27	1	0	0	0	0	0	1	0	0	1
OTU599	25	12	0	29	0	0	22	26	22	0	0	0	1	0	0	0	1	0	0	0	0	0	0	0	1	0	0	0	0	0	0	0	0	0	0	0	0	0	0	0	0	0	0	0	0	0	0	0	0
OTU5995	20	14	68	17	0	35	13	17	23	21	15	8	7	37	25	75	0	43	27	1	46	0	14	8	0	1	33	39	16	48	0	15	0	57	0	0	19	1	22	0	1	24	20	0	0	68	105	0	0
OTU6	1303	1204	1581	1385	1693	1557	1416	1414	1623	261	281	183	266	500	461	870	716	493	844	467	907	439	823	574	823	501	708	610	495	578	808	954	1150	946	764	1027	442	782	1075	573	858	581	771	740	863	802	621	896	905
OTU60	160	84	63	90	167	123	127	128	65	22	55	104	28	121	225	91	118	314	37	256	95	75	207	337	104	158	212	278	115	239	167	270	210	349	386	363	132	54	167	58	249	174	185	201	165	112	212	338	215
OTU600	0	10	1	0	16	23	0	17	27	0	0	0	6	0	0	0	29	0	0	0	0	0	0	0	0	0	0	0	0	0	0	0	0	0	0	0	0	0	0	26	25	0	0	0	0	0	0	0	0
OTU601	0	26	4	0	0	12	3	7	5	0	0	0	1	3	3	5	23	1	0	4	0	1	0	1	58	0	1	33	14	0	0	2	40	38	1	0	0	0	0	0	0	0	71	19	18	42	0	0	33
OTU6012	14	23	0	4	0	22	47	0	45	0	0	0	0	1	0	0	0	0	0	0	0	0	0	0	0	0	0	0	0	0	0	0	0	0	0	0	0	0	0	0	0	0	0	0	0	0	0	0	0
OTU602	11	7	14	0	34	0	0	10	37	0	0	0	0	0	0	1	1	0	0	1	1	0	0	0	1	0	0	0	0	0	1	0	0	0	1	0	0	0	0	0	0	0	0	0	0	0	0	0	0
OTU603	0	0	0	0	15	2	0	0	0	0	0	1	0	0	0	0	27	28	45	21	0	9	0	0	0	0	0	0	0	22	0	0	0	0	0	0	0	0	0	0	0	0	25	0	0	44	0	0	1
OTU604	13	25	3	7	26	16	8	40	9	0	0	0	8	0	0	0	1	0	0	0	36	15	17	1	38	0	0	0	3	0	56	0	0	0	0	0	14	1	0	62	80	0	0	0	15	29	0	0	0
OTU605	6	0	17	35	20	0	24	15	13	0	3	0	0	0	46	99	31	0	0	1	31	0	0	36	40	38	0	0	0	0	0	0	0	0	0	0	96	22	0	0	0	0	35	0	11	0	31	0	0
OTU606	0	0	4	0	0	8	1	8	1	0	0	0	10	0	24	0	36	0	23	28	0	0	28	1	34	0	21	0	6	31	0	20	28	0	30	0	24	3	0	23	0	13	37	0	44	0	0	1	33
OTU607	13	0	0	0	5	20	13	21	0	0	0	0	1	0	0	0	0	1	0	0	0	0	38	0	15	0	1	0	0	0	0	0	2	0	0	0	0	1	46	1	0	1	1	0	33	0	13	0	0
OTU608	0	30	18	0	16	0	34	32	29	23	0	0	0	29	0	0	0	81	0	1	73	43	26	0	44	1	14	1	21	49	0	0	0	0	0	79	0	0	76	0	0	1	0	42	0	20	0	1	0
OTU609	18	0	27	0	13	9	15	5	5	0	15	0	17	1	112	84	29	28	9	38	0	1	0	45	44	60	2	0	0	2	8	1	43	49	0	71	0	67	60	0	2	16	1	45	76	168	36	39	5
OTU61	56	84	106	90	86	111	85	109	85	41	62	24	43	54	239	259	68	145	168	130	153	73	63	77	157	85	170	120	199	47	131	44	188	141	57	137	92	149	149	51	111	89	213	49	93	227	228	119	77
OTU610	0	1	2	9	10	1	0	13	0	0	0	1	28	2	22	1	0	14	0	0	0	14	0	23	85	0	51	55	0	19	0	14	0	0	59	0	42	0	27	0	0	19	0	32	43	0	0	0	0
OTU6109	1	0	1	1	10	5	9	1	1	8	0	0	6	1	0	1	47	1	0	0	0	0	3	3	0	0	20	0	9	1	0	0	95	0	1	25	0	0	1	0	1	0	0	0	8	0	1	0	0
OTU611	24	0	22	27	25	6	13	6	0	0	0	0	0	7	0	0	2	0	37	0	0	0	0	0	0	19	0	0	0	1	0	0	0	0	0	1	0	4	0	1	0	0	0	2	8	23	0	40	0
OTU612	1	0	6	12	5	15	13	1	17	2	4	5	0	32	0	2	0	19	43	28	0	0	0	0	36	0	1	0	0	0	1	0	0	0	0	1	25	0	0	0	0	0	0	33	0	1	0	0	51
OTU6125	8	4	20	4	5	2	19	15	16	0	0	0	0	0	0	0	1	0	0	0	0	0	0	0	0	0	0	0	0	25	32	1	1	0	0	0	1	4	1	0	0	33	23	0	0	1	0	0	0
OTU613	0	0	0	2	0	0	4	0	6	5	0	0	0	0	0	0	0	31	0	0	13	4	0	0	21	0	0	43	2	60	0	29	61	1	0	0	0	19	0	0	0	0	0	0	10	0	0	35	9
OTU614	1	23	0	0	3	22	0	7	8	0	0	0	0	24	23	0	0	0	49	44	0	16	17	0	0	1	28	31	0	0	0	21	0	24	0	48	0	0	16	0	0	35	0	5	1	18	0	0	0
OTU615	0	1	0	3	0	0	3	0	0	5	0	5	0	4	0	0	0	0	0	0	25	0	0	1	0	1	0	0	0	86	107	0	0	0	0	0	1	1	0	0	0	0	0	0	37	1	0	0	0
OTU616	53	10	12	44	10	0	4	9	6	0	0	0	0	95	80	26	0	0	133	0	70	27	53	1	72	0	38	17	0	0	0	58	46	0	41	117	39	4	0	0	157	58	0	1	26	0	10	0	29
OTU617	19	0	11	11	5	4	1	0	4	3	0	2	0	98	9	0	22	3	32	1	1	17	0	1	35	13	1	88	39	0	75	54	0	1	3	0	57	99	73	90	48	30	54	64	38	0	0	60	140
OTU618	15	21	33	15	38	0	0	21	19	0	0	1	13	0	40	1	2	0	60	1	0	30	0	17	18	2	34	1	40	37	33	62	80	2	41	79	0	1	91	104	1	52	42	0	21	2	11	0	0
OTU619	6	8	0	1	14	4	13	2	0	12	5	1	0	13	3	3	3	3	2	5	2	1	1	27	2	71	26	75	10	23	88	12	42	3	72	2	0	2	27	2	77	30	31	1	22	0	1	77	0
OTU62	553	580	389	519	580	507	435	515	330	47	45	19	34	5	38	84	56	88	158	88	104	124	95	99	69	96	86	120	99	88	124	114	69	46	41	116	57	108	95	167	163	17	319	33	80	118	17	185	42
OTU620	0	23	4	14	33	8	10	15	6	0	0	0	0	1	1	13	3	24	1	0	37	0	0	0	2	18	25	0	60	30	56	3	40	0	0	10	2	0	0	0	19	12	0	24	30	27	19	36	60
OTU621	0	0	0	1	0	0	1	1	0	1	0	0	0	33	14	0	0	0	0	41	0	12	0	0	0	0	0	0	0	0	0	0	0	20	48	0	0	0	29	0	0	0	24	0	0	0	0	73	0
OTU622	14	14	28	26	26	12	23	18	21	0	0	0	1	0	0	18	1	31	1	1	2	15	71	1	0	17	1	0	2	0	1	7	21	0	0	0	0	0	1	0	0	0	31	0	0	0	36	115	0
OTU623	0	8	5	1	19	7	10	0	17	1	0	0	14	18	55	2	0	0	0	0	48	43	7	18	21	0	1	0	13	0	0	0	11	1	0	1	32	0	0	0	2	0	0	0	45	0	13	0	0
OTU624	0	0	0	0	7	14	10	9	0	0	0	0	0	0	0	29	0	0	32	0	15	0	0	0	0	0	0	0	0	21	0	0	0	1	0	0	0	8	47	1	0	0	0	1	0	0	0	0	0
OTU625	16	11	11	0	0	11	8	11	11	0	0	1	0	17	16	25	0	28	0	1	0	1	0	0	46	0	1	0	0	1	0	38	0	0	0	15	1	1	0	0	0	0	0	26	0	14	0	0	0
OTU626	0	0	11	0	0	0	0	19	0	15	0	0	0	0	61	28	0	0	0	0	0	0	0	1	0	0	0	26	0	0	65	0	0	0	29	0	0	0	0	0	0	0	0	0	35	0	0	0	0
OTU627	0	0	0	5	0	1	7	0	4	5	1	0	0	23	53	101	23	19	1	30	0	0	0	0	23	1	0	127	0	22	3	2	0	41	40	0	0	0	0	0	45	16	0	1	23	1	0	50	7
OTU6278	2	0	4	3	0	0	0	0	0	0	11	0	0	0	38	1	0	1	0	57	0	0	20	33	8	0	0	0	6	2	36	0	0	0	47	12	0	0	0	0	0	0	0	30	0	0	0	49	42
OTU628	0	0	0	0	0	0	30	0	0	0	0	0	0	0	1	22	0	0	0	55	18	0	0	0	0	0	0	0	6	0	0	54	0	0	33	0	0	0	0	0	0	0	94	47	22	0	0	0	0
OTU6282	12	17	79	7	34	39	32	63	39	2	11	1	7	72	9	36	32	0	62	20	14	47	54	76	8	61	0	143	44	80	2	140	103	4	115	1	3	20	1	1	44	13	0	32	25	34	0	148	22
OTU629	0	6	1	0	1	36	11	12	12	1	1	0	0	0	0	67	0	0	0	0	0	0	0	31	0	0	0	36	0	0	0	0	0	0	32	0	26	0	0	0	1	77	0	0	0	0	0	0	0
OTU63	143	60	73	71	55	66	123	137	121	66	45	41	43	106	100	138	69	180	156	148	188	155	1	106	112	30	107	153	160	58	135	81	42	141	36	131	61	58	168	95	3	59	124	4	144	359	97	227	141
OTU630	0	0	10	0	4	0	2	0	15	14	3	18	32	0	0	28	21	0	0	1	58	0	7	13	1	12	0	0	0	0	2	2	61	0	27	3	0	0	0	30	0	0	1	0	0	0	0	0	41
OTU631	8	21	0	1	0	0	8	5	0	0	0	0	0	1	130	2	1	0	134	25	1	0	0	0	0	0	0	0	0	36	0	58	3	1	0	78	0	2	0	0	0	0	71	0	0	0	0	39	0
OTU632	8	12	7	19	20	12	7	6	16	0	9	11	0	0	0	11	0	0	0	0	0	0	36	0	0	0	0	0	0	0	0	113	56	0	0	6	0	0	0	0	0	0	0	0	17	0	0	0	0
OTU633	31	7	5	4	0	12	19	19	10	0	0	0	0	2	12	42	0	0	0	0	9	0	0	0	0	0	0	0	3	44	0	0	0	0	0	34	17	0	0	122	0	0	0	0	1	1	0	0	28
OTU634	0	0	0	5	0	0	0	0	0	0	0	0	0	28	0	0	96	0	0	0	0	0	0	0	0	0	1	27	0	0	0	0	0	35	0	0	0	0	57	0	0	0	86	0	0	0	0	0	0
OTU635	0	1	4	4	1	0	0	0	0	12	0	10	0	4	34	0	2	58	1	57	24	23	0	0	45	44	0	19	0	0	0	0	0	0	0	0	1	30	0	0	2	35	23	21	0	0	0	0	0
OTU636	23	0	54	0	0	0	0	0	0	0	0	0	0	0	0	1	2	0	1	0	1	0	0	0	1	0	0	0	1	35	0	0	32	0	0	0	1	0	0	18	0	0	0	67	0	3	154	28	0
OTU637	12	9	6	29	12	11	29	34	6	0	1	0	7	0	0	0	0	0	0	0	0	0	0	0	0	0	0	0	11	0	1	0	0	0	0	0	0	0	0	0	0	0	0	0	10	0	0	0	0
OTU638	0	7	0	14	7	17	24	5	1	0	0	0	0	31	0	1	0	66	1	1	0	0	0	0	0	0	0	0	0	0	0	0	0	0	0	3	0	0	14	0	0	0	10	0	0	18	0	0	0
OTU6389	18	5	14	2	0	17	12	10	9	0	0	0	0	1	0	0	0	0	0	0	0	0	0	0	0	0	0	0	0	0	0	0	0	0	0	0	0	19	0	29	0	0	0	0	0	0	37	0	0
OTU639	0	2	0	0	0	7	0	4	22	0	14	1	9	0	39	12	71	0	0	81	0	16	0	0	0	49	19	29	5	1	28	0	97	81	63	0	0	58	27	0	0	24	0	0	0	24	0	35	30
OTU64	120	24	111	117	63	191	91	88	84	1	1	22	92	57	49	66	19	31	25	46	29	88	63	53	58	35	83	20	19	9	32	231	49	0	138	40	279	149	5	8	162	41	160	164	25	96	263	23	104
OTU640	22	19	3	1	9	6	0	0	14	0	7	0	0	34	5	1	4	0	77	29	54	23	90	0	0	0	40	31	36	60	49	46	73	0	2	77	38	110	97	0	24	0	46	14	4	46	103	19	134
OTU641	18	2	14	0	11	7	4	0	10	1	0	12	1	38	20	23	0	29	0	70	6	15	42	1	0	0	27	0	15	22	41	0	34	0	0	40	0	62	0	0	78	0	116	0	43	70	2	31	50
OTU642	18	31	23	78	24	7	0	46	53	0	0	0	0	0	0	31	0	0	1	0	0	0	1	0	0	0	0	0	2	0	0	0	0	0	0	0	6	0	0	0	0	0	0	0	0	0	0	0	0
OTU643	62	58	81	19	10	50	12	49	25	10	12	5	0	52	0	0	0	50	90	43	46	0	0	82	10	0	55	68	37	41	0	1	52	74	43	0	56	47	66	24	0	68	19	26	107	2	0	7	25
OTU6435	0	0	6	0	0	7	1	0	0	0	8	0	12	0	0	0	10	0	0	0	0	14	0	0	0	0	80	29	19	0	29	0	0	0	0	0	1	0	26	1	0	0	0	19	0	0	0	0	34
OTU644	0	0	18	0	13	43	19	29	0	0	0	0	0	2	0	0	1	0	3	0	1	0	20	0	0	0	0	0	18	1	0	0	1	2	1	0	0	0	0	1	0	0	1	1	24	0	0	0	0
OTU645	8	14	11	0	5	0	0	1	9	15	21	6	14	88	26	0	42	0	0	47	23	0	0	29	0	1	31	0	36	33	0	0	0	0	0	23	16	0	0	45	0	0	0	0	21	1	0	55	0
OTU646	0	8	0	0	1	23	1	2	0	0	9	0	1	1	2	1	38	56	54	8	11	0	12	0	2	26	31	0	9	18	30	35	28	1	0	1	0	1	61	27	0	0	19	40	20	1	136	28	43
OTU647	51	19	11	7	2	19	17	31	20	0	0	0	0	0	2	0	0	0	0	0	0	0	0	0	0	0	0	0	0	0	2	0	0	0	0	0	6	0	0	0	0	0	0	0	0	0	0	0	0
OTU648	0	15	0	14	5	0	0	0	0	0	0	0	0	0	0	1	0	0	0	0	0	0	0	0	0	23	0	0	0	0	0	20	0	0	0	0	0	0	0	77	0	0	0	0	0	0	0	0	1
OTU649	9	16	8	30	0	0	13	19	5	2	0	1	0	0	1	0	35	20	0	0	0	5	0	0	0	11	0	0	35	0	25	1	24	0	43	1	51	19	0	0	1	0	0	1	35	32	0	29	26
OTU65	248	263	170	229	212	234	152	169	241	22	24	21	8	45	136	245	100	45	1	93	78	45	35	137	121	48	117	207	83	146	79	139	128	133	309	51	83	239	226	108	103	156	116	228	173	89	149	91	106
OTU650	10	0	0	0	10	0	1	0	0	10	0	0	0	0	0	23	19	0	0	61	0	0	1	1	1	15	0	1	0	20	0	0	0	0	0	0	36	0	0	0	14	0	0	0	12	0	0	0	0
OTU651	0	0	0	4	1	0	0	4	0	0	0	0	0	46	0	0	65	0	14	0	11	0	0	12	0	0	0	0	0	1	0	0	0	0	0	0	28	0	0	0	0	1	0	0	0	0	0	0	0
OTU652	32	18	29	35	25	65	35	27	20	0	0	0	0	22	13	0	0	0	0	0	1	0	0	0	0	0	0	0	0	0	0	0	0	0	0	0	0	59	0	0	0	0	0	0	0	0	0	0	0
OTU653	64	2	23	23	42	33	14	17	46	44	19	20	1	2	10	59	3	22	6	85	57	27	5	2	5	4	3	65	2	99	68	36	6	3	144	31	24	7	0	0	2	21	67	78	66	0	39	83	1
OTU654	0	0	3	0	0	8	0	0	0	6	0	0	0	0	1	0	0	0	0	20	0	0	0	0	33	22	0	0	31	0	0	1	0	28	0	1	0	0	0	0	0	0	19	0	21	44	1	19	28
OTU6547	0	9	2	0	0	8	0	0	6	0	22	0	0	0	0	0	0	1	0	0	0	0	1	0	0	0	0	0	0	0	1	0	70	0	0	0	0	0	0	0	19	0	1	0	0	0	0	0	0
OTU655	0	100	93	30	43	12	11	44	48	0	4	0	15	1	0	0	11	0	0	0	0	0	0	5	0	0	0	0	1	4	0	0	0	0	0	0	0	0	5	0	0	1	0	46	0	35	49	2	1
OTU656	0	0	14	0	1	0	0	7	0	0	0	0	0	11	0	1	0	0	0	26	0	12	0	0	0	0	0	0	22	0	0	0	53	35	24	0	21	1	0	0	0	27	18	0	0	1	0	0	51
OTU657	1	0	0	4	0	0	1	0	17	0	0	1	0	0	1	6	2	0	0	0	11	1	1	2	4	0	0	0	0	20	59	0	1	0	0	1	33	0	0	0	39	14	0	1	0	0	0	0	56
OTU658	0	0	1	6	0	0	0	24	19	0	0	3	11	30	0	0	1	0	0	0	18	35	0	0	0	0	1	0	0	14	0	0	0	0	0	38	0	0	0	41	1	0	0	0	0	31	0	0	0
OTU6586	0	0	20	1	6	5	7	1	3	2	4	2	11	84	1	0	27	1	0	17	28	4	18	0	0	0	41	0	10	0	0	0	0	0	25	36	6	6	2	67	0	25	0	51	36	34	0	24	0
OTU659	0	0	0	0	0	0	0	0	0	0	0	0	7	0	0	0	0	0	1	0	0	14	16	0	0	22	45	0	0	0	0	0	63	0	41	0	1	0	32	58	54	0	0	25	8	23	28	51	27
OTU66	83	46	20	68	66	107	24	51	33	3	23	33	22	112	25	63	8	151	100	88	50	37	41	86	39	12	33	127	203	62	30	55	71	92	30	115	43	150	194	223	154	129	24	40	52	250	62	117	103
OTU660	38	43	32	15	25	16	57	23	22	12	9	4	0	31	0	2	0	1	28	0	0	40	22	1	0	1	28	0	18	67	0	157	0	74	1	10	14	11	0	0	0	28	13	37	77	1	50	54	40
OTU661	0	0	0	0	0	0	0	2	0	18	3	7	8	18	36	1	2	110	25	0	0	0	0	0	1	17	72	100	58	0	11	75	0	33	22	0	0	1	55	79	1	9	85	2	0	22	2	0	26
OTU6610	8	15	3	0	0	4	0	0	0	21	1	0	0	0	2	0	3	1	0	0	29	0	2	0	2	0	0	1	16	84	0	54	0	0	1	0	0	0	0	0	89	0	1	0	14	1	0	0	38
OTU662	0	0	0	0	0	0	0	0	0	5	0	0	0	0	20	1	2	18	35	24	11	10	0	0	0	0	0	36	43	0	0	0	0	0	0	35	0	0	35	27	0	19	16	0	0	0	0	44	62
OTU6626	24	4	10	1	0	7	17	0	8	6	1	1	1	58	0	3	3	27	23	0	19	24	0	28	0	0	1	0	31	24	42	32	1	1	0	0	8	2	33	0	34	1	1	1	4	0	4	0	0
OTU663	0	0	6	8	16	0	0	1	17	0	6	0	1	0	0	0	1	0	0	22	9	26	0	24	2	5	31	3	4	1	1	11	0	25	1	31	254	0	0	1	0	0	33	0	11	36	0	0	0
OTU664	18	1	42	3	0	2	2	8	9	22	2	4	1	2	67	26	48	15	33	3	38	59	2	40	1	6	40	51	29	42	64	28	43	80	142	1	41	66	1	51	3	0	100	3	0	0	13	138	0
OTU665	5	0	12	5	21	9	5	24	0	58	7	2	0	8	51	64	35	2	11	1	50	5	96	34	85	0	28	38	17	18	20	125	2	75	149	108	4	35	65	45	1	8	28	22	20	69	19	66	66
OTU666	21	22	20	31	33	0	18	20	29	0	0	0	2	0	0	0	0	0	0	0	0	0	0	0	0	0	0	0	0	0	0	0	0	0	0	0	0	0	0	0	0	12	0	0	0	0	0	0	0
OTU6668	6	0	0	13	8	5	16	0	19	0	0	0	0	0	1	0	19	0	0	48	30	0	0	0	1	1	0	0	2	0	0	0	0	0	0	0	0	18	0	0	0	0	0	17	0	0	3	13	0
OTU667	1	3	1	13	6	13	7	13	2	1	5	0	0	0	0	51	0	0	0	0	0	2	1	12	4	3	0	1	3	17	0	0	0	0	0	0	0	23	1	37	1	1	0	0	0	58	0	30	1
OTU668	1	0	1	1	5	7	10	0	0	0	0	0	0	0	49	22	0	0	31	0	0	0	0	0	0	0	0	0	13	50	61	1	36	0	1	1	73	0	60	0	0	1	2	0	13	43	20	48	38
OTU669	6	27	21	14	4	5	17	13	43	0	0	0	0	15	0	0	0	0	1	47	56	0	0	0	0	24	0	0	0	0	27	2	0	17	0	0	33	0	37	0	40	0	0	0	0	0	0	1	0
OTU67	162	132	164	121	136	123	65	136	107	22	11	38	122	193	152	95	72	105	202	149	132	95	181	39	15	48	78	112	153	72	134	155	32	153	2	115	83	60	193	237	263	57	120	205	161	267	344	72	159
OTU670	0	0	5	0	0	1	3	0	0	0	0	0	12	54	32	0	0	0	0	0	0	0	0	0	0	0	64	0	0	0	0	0	0	0	0	174	0	0	0	0	0	29	0	0	0	0	0	0	0
OTU671	12	0	28	6	6	15	6	4	6	0	30	0	15	0	11	0	0	74	2	0	27	12	0	0	0	12	16	0	0	0	0	35	0	103	39	63	1	0	0	0	0	55	33	62	0	46	17	101	0
OTU672	24	29	16	36	43	37	37	52	75	4	0	6	0	1	0	0	6	14	0	0	0	13	0	1	0	8	0	0	11	0	72	0	0	3	0	0	0	0	0	1	1	0	43	0	0	43	55	0	0
OTU673	0	12	2	0	0	10	0	6	15	10	6	0	0	1	15	2	55	1	81	39	3	3	31	14	6	3	2	1	1	1	21	40	67	0	0	25	45	1	0	0	0	0	0	0	39	0	0	27	50
OTU674	41	7	10	7	0	0	6	36	13	0	0	0	0	0	0	0	0	0	0	0	0	0	0	0	0	0	0	0	0	13	0	0	0	0	0	0	0	0	0	0	0	0	0	0	0	0	0	0	0
OTU6746	0	5	0	1	0	5	1	11	0	0	0	0	0	0	3	9	0	0	20	0	15	1	0	0	31	1	16	0	3	1	1	2	72	2	1	5	1	1	0	16	0	1	37	1	0	0	0	0	19
OTU675	0	5	12	0	14	7	0	16	1	16	2	1	1	1	2	65	2	17	0	5	2	0	33	0	1	36	3	64	51	81	38	0	3	3	1	4	1	0	41	23	58	3	108	1	18	46	0	52	34
OTU676	23	21	8	7	6	38	9	21	25	1	0	1	0	0	0	0	0	0	0	0	0	1	0	0	0	0	0	0	0	1	0	0	0	0	0	0	14	0	0	0	0	0	0	0	0	0	0	0	0
OTU677	60	10	0	22	35	8	17	10	0	0	0	0	0	0	0	0	0	0	0	0	0	0	0	0	0	0	0	0	0	0	0	0	0	0	0	0	0	0	0	0	0	0	0	0	0	0	0	0	0
OTU678	0	0	5	24	14	0	0	0	5	0	0	0	0	0	46	0	0	0	0	18	0	0	43	44	0	0	0	0	3	14	0	0	0	0	0	0	0	0	1	0	0	0	0	0	24	0	0	0	37
OTU679	0	0	16	0	2	9	0	0	0	0	0	0	0	12	20	0	0	23	1	20	1	1	0	1	0	0	51	52	16	0	0	0	0	2	32	0	20	0	0	0	0	1	1	0	22	0	0	0	87
OTU68	27	38	42	45	39	41	34	82	34	9	14	10	36	115	110	112	3	96	0	44	72	43	86	40	50	0	166	61	39	217	206	116	1	244	57	156	102	88	1	152	95	71	104	4	101	50	1	56	207
OTU680	25	0	36	0	13	22	10	13	12	0	0	0	1	0	0	0	0	0	0	0	0	0	0	0	0	0	0	0	0	11	0	0	0	0	0	0	0	1	0	0	1	0	0	0	0	0	29	0	0
OTU6802	1	1	0	3	4	22	0	3	13	0	0	0	0	0	0	24	2	16	0	0	0	11	0	0	1	0	0	0	22	0	0	0	0	0	0	0	0	0	0	0	0	0	0	0	23	0	38	0	0
OTU681	0	5	5	9	6	0	3	0	0	2	1	1	0	0	2	0	0	0	1	0	0	0	0	1	33	15	0	16	9	0	0	6	0	0	0	0	0	0	0	1	42	0	1	0	1	0	38	0	0
OTU682	15	0	13	6	0	2	0	4	0	0	0	0	0	0	0	1	0	0	0	60	0	0	0	0	0	0	0	0	0	0	0	0	0	0	11	0	0	1	0	0	81	0	0	0	0	0	0	0	0
OTU683	0	0	0	1	0	6	0	2	8	0	0	0	0	0	1	0	0	0	0	0	1	0	0	22	0	1	0	62	0	0	0	0	0	0	0	0	0	0	0	0	0	0	0	1	0	0	0	0	1
OTU684	1	0	15	0	2	16	10	15	14	2	2	10	14	20	99	1	35	1	35	99	0	0	20	22	67	0	45	0	6	0	12	0	1	47	1	79	66	12	47	0	0	0	34	27	9	11	71	1	0
OTU6841	0	0	0	0	6	7	0	0	0	0	0	15	10	0	1	0	0	0	0	0	0	0	0	0	0	0	0	0	0	0	0	0	0	66	0	0	0	0	0	16	1	0	0	0	0	36	0	0	0
OTU685	3	0	11	9	0	0	0	13	15	0	0	0	0	0	0	0	0	33	0	0	0	0	16	0	0	0	0	0	5	0	0	0	0	0	0	30	0	0	0	0	0	0	0	0	1	0	0	0	0
OTU686	0	0	0	0	0	0	0	0	0	0	12	0	22	0	31	0	0	0	0	0	0	0	0	0	0	0	0	0	0	13	0	0	143	0	0	1	1	1	0	32	0	0	0	0	0	73	0	0	0
OTU687	0	9	1	43	0	15	9	1	17	0	0	0	7	2	1	0	0	0	0	0	0	0	1	0	0	0	0	0	5	47	0	0	0	0	0	0	0	1	0	36	0	1	15	0	22	13	0	0	0
OTU688	37	0	23	0	2	16	0	8	12	0	0	0	0	0	0	0	0	0	0	0	0	0	0	0	0	0	0	1	3	0	0	0	0	0	0	33	0	0	0	19	0	0	0	0	14	0	0	0	0
OTU6885	0	0	8	0	0	17	0	0	0	1	0	0	0	0	0	2	0	10	0	25	0	0	0	0	0	0	41	0	7	0	0	0	0	59	0	0	0	0	0	0	49	0	0	0	0	0	0	68	32
OTU6892	0	3	0	0	8	0	3	0	0	0	0	0	0	34	0	0	70	0	18	0	0	1	0	0	0	0	0	0	1	4	0	0	0	0	0	0	1	0	0	22	0	0	0	0	1	1	0	0	0
OTU69	18	13	16	0	5	9	3	11	3	81	62	64	71	84	179	121	111	186	119	222	252	125	122	139	94	11	151	151	169	246	173	183	211	122	295	288	116	14	71	158	130	108	225	92	171	197	157	158	361
OTU690	33	9	16	6	9	43	13	32	23	0	0	6	12	2	30	41	26	87	0	28	1	0	9	12	21	6	30	9	2	14	1	0	0	1	12	19	20	37	0	57	7	0	1	3	102	0	0	0	2
OTU691	16	11	38	34	26	1	1	31	52	20	2	13	0	5	3	3	17	2	2	3	2	3	0	35	0	24	2	110	16	16	3	2	138	2	2	30	37	0	14	40	1	29	29	1	0	0	4	23	0
OTU692	12	13	4	0	1	25	3	9	3	0	47	9	33	22	1	0	3	1	10	141	0	27	1	180	2	28	31	117	25	0	76	81	1	125	21	1	22	0	19	83	0	3	33	0	67	0	50	56	37
OTU694	12	0	3	5	6	8	7	33	0	15	12	18	0	1	1	1	1	0	41	0	0	1	0	64	31	0	39	0	33	0	0	2	0	35	0	69	0	115	0	103	0	0	0	12	1	175	0	5	69
OTU695	8	6	4	22	27	4	0	17	31	5	1	3	31	1	0	43	1	0	15	0	0	13	8	0	1	23	0	39	8	16	2	1	0	0	0	1	81	1	43	0	1	6	72	44	0	0	69	113	51
OTU6956	34	38	22	26	37	31	58	27	138	0	7	5	0	14	41	0	0	0	34	0	42	44	14	24	39	0	0	1	18	13	0	20	3	0	4	0	2	50	0	1	0	1	38	0	18	60	53	33	72
OTU697	0	0	0	0	0	0	0	5	0	0	0	7	13	0	0	0	16	0	0	0	0	0	0	35	23	0	0	0	0	0	0	0	0	0	0	0	0	0	0	0	0	0	0	0	0	0	0	36	0
OTU698	11	15	0	1	0	8	0	21	0	10	0	0	11	0	0	43	0	49	0	0	0	0	46	23	0	0	0	0	29	0	0	0	0	41	22	0	0	1	27	0	2	0	0	0	1	30	51	0	0
OTU6980	0	9	21	12	1	9	30	17	9	6	0	1	0	24	32	53	1	1	1	22	0	1	17	13	0	32	58	1	14	62	0	0	154	60	47	26	0	28	0	41	5	22	7	50	10	2	0	35	1
OTU6988	0	1	0	0	9	0	0	0	13	0	0	2	0	1	2	1	0	0	0	0	0	23	1	46	0	0	0	1	1	0	65	0	0	2	0	0	17	2	0	0	0	0	26	2	12	60	0	0	6
OTU699	16	0	0	18	1	0	34	13	18	0	0	0	0	0	13	0	0	0	0	0	0	0	1	0	0	0	0	0	0	0	0	0	0	0	0	0	0	0	34	0	0	0	0	0	0	21	4	0	0
OTU6993	10	0	6	3	9	3	0	8	0	0	0	0	0	37	0	22	24	0	29	1	0	0	0	1	0	7	0	0	8	6	0	0	2	1	0	1	1	0	0	17	0	0	0	3	0	0	19	0	4
OTU7	431	359	521	438	314	352	537	537	289	241	225	251	376	641	799	864	996	523	847	797	693	450	622	731	840	492	1058	916	606	633	820	1499	1178	924	1022	911	634	1182	915	783	1048	598	817	911	686	906	1271	1003	1150
OTU70	145	104	23	42	82	48	41	81	113	31	16	3	56	25	30	6	66	95	32	4	68	122	69	141	82	32	174	276	72	111	26	118	110	254	87	186	101	205	394	296	193	95	172	55	123	192	315	77	173
OTU700	44	40	39	40	15	47	21	15	21	0	2	1	16	0	0	0	41	0	21	0	25	1	46	29	84	0	1	21	22	120	2	28	35	1	103	30	1	0	43	38	36	31	1	0	69	2	0	0	3
OTU701	0	32	9	15	17	10	25	8	17	9	0	0	0	20	0	0	0	75	0	0	0	21	1	0	37	1	0	0	0	0	0	40	0	0	0	0	0	6	0	0	0	1	0	0	6	1	0	110	40
OTU702	1	1	0	0	1	28	6	6	0	0	13	4	0	0	9	0	0	3	11	0	1	7	0	0	0	0	0	51	4	20	0	0	5	0	0	0	86	7	0	0	0	0	59	0	0	0	1	0	0
OTU703	0	0	1	0	1	1	0	1	0	1	0	1	0	1	0	0	2	2	0	0	1	30	1	1	0	1	1	1	1	0	0	0	0	0	5	0	0	56	0	1	39	0	24	0	0	1	0	0	78
OTU704	10	0	0	20	9	0	0	7	0	0	0	1	0	24	0	0	1	41	0	0	0	0	0	0	26	0	0	0	16	0	0	26	0	1	0	1	0	0	0	0	0	1	0	2	61	0	0	0	40
OTU705	26	19	7	9	7	14	16	16	9	10	0	0	0	0	0	0	0	0	0	0	0	0	0	0	0	0	0	1	16	0	0	1	1	0	0	780	0	0	0	0	0	0	0	0	1	0	0	0	0
OTU707	0	0	0	0	4	0	21	0	0	0	0	4	0	0	1	0	0	0	0	0	0	0	0	0	0	0	0	0	47	0	0	0	0	0	0	18	35	0	0	31	0	0	0	0	15	1	0	0	0
OTU7073	12	0	16	0	14	17	15	2	0	0	0	0	0	30	7	0	0	0	0	0	0	0	0	0	0	0	0	0	0	4	60	0	0	0	0	0	11	0	0	0	0	0	0	0	4	0	22	0	0
OTU708	11	10	1	0	13	7	9	0	0	0	0	6	0	0	0	0	0	0	0	0	24	4	0	22	0	0	0	0	11	38	2	0	0	39	108	1	0	0	1	0	0	19	60	0	0	0	0	0	0
OTU7082	3	1	9	8	4	17	6	25	19	0	0	0	0	0	0	47	0	0	0	1	0	21	3	1	0	0	0	0	13	0	0	0	0	0	0	1	0	4	0	41	3	0	2	0	20	2	0	1	0
OTU7083	5	14	8	30	23	3	37	15	30	0	0	0	0	13	0	0	0	20	0	0	0	10	0	0	0	0	0	0	2	5	1	17	0	0	3	0	1	1	1	6	1	2	0	37	0	2	0	0	0
OTU709	0	0	29	21	5	8	2	0	0	13	8	0	13	0	43	1	64	1	0	50	1	0	1	0	0	0	2	0	8	14	2	61	39	72	0	0	13	0	20	21	0	1	0	0	29	0	0	0	42
OTU71	295	291	259	157	299	213	201	248	250	1	1	1	2	2	0	0	2	1	3	3	2	0	14	0	0	0	1	1	3	0	3	15	1	0	3	0	2	2	0	0	0	0	0	0	3	0	0	0	0
OTU710	0	0	0	10	0	0	9	3	6	2	0	0	0	0	2	0	0	1	0	0	1	0	0	0	0	0	0	0	49	1	0	0	1	0	0	31	0	0	0	0	115	0	63	0	0	0	0	0	0
OTU711	0	0	0	0	0	0	0	0	0	0	0	0	0	43	114	0	0	0	0	27	0	25	0	50	0	0	0	0	4	14	0	0	56	0	0	0	0	0	0	0	0	0	0	0	0	0	0	0	0
OTU713	0	0	4	0	12	0	1	2	1	0	0	0	0	0	0	0	0	0	53	0	29	12	1	0	0	0	0	0	0	28	0	1	0	62	0	0	27	24	0	6	0	32	0	0	12	0	0	0	0
OTU714	3	8	60	7	12	31	0	0	0	8	15	0	80	25	27	1	10	0	50	29	0	88	0	9	41	24	137	2	69	103	165	1	0	0	9	52	28	86	3	51	81	0	0	155	0	112	0	0	109
OTU715	0	2	9	0	1	22	0	0	0	0	1	0	0	16	1	0	0	0	0	3	0	0	0	0	1	0	0	0	0	93	0	0	0	0	19	0	1	0	0	22	0	0	1	12	46	4	1	0	0
OTU716	4	18	9	14	9	2	7	25	19	11	0	1	0	0	0	0	17	0	1	0	0	0	0	0	0	0	16	0	0	0	0	0	30	13	1	1	0	0	5	54	0	15	0	5	0	44	1	0	0
OTU717	0	0	0	0	5	0	0	20	11	0	20	18	11	0	0	34	0	0	0	1	0	21	0	0	15	2	24	66	0	37	82	0	40	29	0	0	14	0	1	11	0	13	0	0	23	109	0	0	0
OTU718	6	1	0	0	1	0	1	12	1	0	19	0	0	1	1	10	1	1	27	0	2	0	0	1	1	14	0	1	0	0	1	0	1	0	36	0	0	83	0	46	45	0	0	0	21	0	0	0	0
OTU719	14	14	6	5	1	10	5	0	20	0	0	0	0	34	2	0	14	0	17	15	1	1	0	1	18	1	0	41	0	14	0	0	0	0	0	27	20	1	17	4	1	9	1	14	0	0	1	39	1
OTU72	122	56	71	165	104	30	120	81	102	15	19	24	59	86	35	138	69	76	118	112	1	26	84	48	127	52	63	42	76	65	44	124	172	66	120	143	36	60	94	188	60	53	51	69	168	132	27	76	35
OTU720	6	9	0	27	0	7	9	0	17	1	0	3	9	1	0	1	29	0	2	1	6	2	0	16	65	0	1	0	2	2	0	0	0	1	28	0	29	0	0	0	0	19	5	0	1	26	0	0	0
OTU721	23	1	19	11	13	13	15	56	58	0	0	0	21	3	41	80	28	0	1	5	2	1	0	21	3	20	2	17	0	40	0	0	1	1	1	0	3	3	1	65	35	35	1	0	17	26	1	1	0
OTU723	0	0	0	0	0	0	0	0	0	0	0	0	0	0	0	0	0	0	0	0	23	0	0	0	0	0	0	0	0	0	0	0	0	92	0	0	0	0	0	0	0	0	17	0	0	10	0	0	0
OTU724	0	19	4	10	12	10	4	10	21	0	0	0	0	0	0	0	0	0	45	3	0	1	0	10	0	0	23	0	8	1	0	0	0	97	0	0	0	0	0	48	0	47	15	0	23	0	61	0	28
OTU725	0	0	11	0	5	1	15	3	0	7	5	0	0	14	0	0	1	0	23	1	52	19	0	0	0	1	0	43	15	0	0	0	0	41	32	48	10	0	53	1	37	0	0	19	0	0	22	0	0
OTU726	28	29	3	7	31	8	11	17	16	0	0	0	0	0	0	0	0	0	0	53	0	0	0	0	0	0	0	0	7	0	0	0	0	0	0	0	0	0	0	0	0	0	0	0	0	6	0	0	0
OTU727	3	0	0	11	29	0	0	0	0	0	0	0	0	0	0	0	1	0	0	1	0	0	0	0	0	0	0	0	0	0	0	0	0	0	0	0	0	0	0	68	0	0	0	0	0	0	1	0	0
OTU729	0	9	13	0	0	0	0	0	0	0	0	0	0	0	50	27	0	1	0	22	0	1	0	0	0	0	69	1	0	33	0	0	0	0	0	0	0	52	0	0	97	0	0	0	0	0	0	0	45
OTU73	11	25	15	50	22	27	27	24	26	29	10	17	26	29	101	85	22	179	63	77	52	126	71	41	77	39	114	32	106	28	146	109	80	0	363	147	12	85	159	96	198	43	138	75	53	47	228	43	66
OTU731	0	0	0	0	21	0	0	11	0	0	0	0	0	0	0	31	1	0	0	0	0	0	0	0	0	0	0	0	11	0	0	0	0	0	0	0	41	0	0	1	1	1	0	0	0	0	54	23	57
OTU732	41	23	1	15	1	2	6	0	0	0	20	0	0	0	3	33	29	0	0	0	0	0	65	84	0	14	25	0	0	49	0	61	0	56	39	0	1	0	42	0	0	0	0	0	5	0	0	0	0
OTU7320	2	0	0	0	0	0	0	12	0	0	0	6	0	0	0	0	21	1	0	0	0	0	0	0	28	0	0	0	0	0	24	0	24	0	0	0	27	0	31	0	0	0	1	0	0	0	0	24	0
OTU733	0	0	0	3	19	0	0	0	1	0	22	0	32	21	23	0	41	0	0	16	0	0	0	0	0	1	10	0	10	2	39	36	0	76	8	92	1	87	20	19	78	1	38	0	15	1	0	0	0
OTU7334	18	0	11	0	2	0	9	6	0	0	0	0	0	0	0	0	0	0	0	1	0	0	0	0	1	0	0	71	0	0	0	0	0	0	0	0	0	0	0	0	24	0	74	0	0	0	0	0	0
OTU734	31	33	59	53	58	49	68	51	30	0	0	0	18	2	12	14	2	33	0	1	7	35	30	2	32	3	4	3	24	16	34	35	0	1	35	42	43	37	74	9	28	26	43	5	11	11	14	28	13
OTU735	0	0	0	0	0	0	4	0	8	0	0	0	0	10	23	1	1	0	59	0	0	0	33	0	10	0	0	71	0	1	0	0	48	0	1	0	1	0	0	50	0	0	0	0	0	0	0	0	0
OTU736	0	0	0	0	0	0	4	0	0	0	0	0	0	0	20	0	0	33	0	0	0	0	35	0	0	13	0	42	0	0	0	0	0	0	0	0	37	0	0	0	0	0	0	0	0	0	0	0	0
OTU737	32	21	0	0	28	15	1	0	5	0	0	1	1	1	0	0	0	0	0	0	0	0	16	0	0	7	29	33	0	0	0	0	0	0	44	44	0	4	3	39	0	15	0	0	31	6	0	0	58
OTU739	8	33	60	41	12	6	21	31	26	0	8	3	2	72	31	35	2	1	1	36	1	0	1	18	0	0	0	2	10	89	2	109	3	96	67	3	0	0	54	84	2	0	50	2	71	62	0	29	60
OTU74	4	34	10	18	54	17	21	15	16	13	21	36	28	40	46	64	92	95	140	114	118	58	9	90	149	5	55	120	116	45	57	68	110	85	64	122	75	132	188	129	59	75	126	71	12	139	111	103	47
OTU740	0	0	0	0	2	0	0	0	0	35	0	0	0	0	0	1	0	0	0	0	0	0	0	57	0	0	0	0	0	0	0	0	0	0	0	0	0	64	0	60	0	0	0	0	0	0	0	80	60
OTU741	32	24	37	16	24	15	52	0	50	5	0	0	0	0	0	0	0	0	0	0	0	0	0	0	0	0	2	0	0	0	0	0	0	0	0	0	0	0	0	0	0	0	0	0	0	0	0	0	0
OTU743	6	0	0	8	1	0	2	0	0	27	0	13	0	35	51	26	3	0	0	42	30	1	45	1	43	0	83	31	0	51	76	0	0	0	73	1	1	1	32	60	0	0	0	0	0	40	0	0	23
OTU744	0	4	0	0	0	0	0	0	18	12	0	0	0	0	0	0	0	0	40	2	1	2	0	0	1	1	1	1	6	0	0	0	0	41	58	0	0	56	53	0	0	0	24	30	0	0	0	0	63
OTU745	14	101	5	3	0	4	7	7	0	8	0	7	1	0	1	0	0	0	0	29	0	0	1	1	52	0	0	0	0	1	1	0	0	0	0	52	0	15	21	0	0	0	0	58	1	70	0	77	0
OTU7453	14	6	0	0	1	2	0	0	16	0	0	0	1	0	0	0	0	8	1	0	1	2	5	0	0	8	0	2	2	17	1	1	5	9	147	1	0	1	0	85	0	0	0	0	1	0	0	0	0
OTU747	31	19	1	8	23	12	22	14	10	0	0	1	0	25	59	4	1	1	33	2	28	3	2	0	0	1	1	32	12	20	0	0	0	1	2	2	21	2	0	81	0	0	61	0	19	40	33	1	106
OTU748	0	0	0	1	0	0	0	0	0	0	0	0	1	0	0	1	22	0	0	0	0	0	27	26	27	0	0	45	0	1	54	23	0	0	1	0	24	26	0	0	1	0	0	0	0	0	44	43	49
OTU7485	0	0	0	10	0	0	0	8	0	0	7	0	0	49	0	46	74	0	0	0	1	0	90	13	0	1	0	0	3	0	1	0	0	0	0	0	0	0	74	0	59	0	0	0	29	0	0	0	0
OTU749	0	9	7	0	14	9	10	16	0	0	0	0	26	46	1	0	2	0	0	2	1	1	1	32	1	0	0	1	14	26	36	0	64	0	1	0	0	0	0	0	2	0	0	0	0	0	0	0	1
OTU75	134	119	96	65	116	129	72	140	116	19	18	15	30	52	141	78	138	140	160	79	94	35	8	48	159	88	99	141	255	46	0	245	180	141	119	57	74	84	42	84	98	172	86	108	62	76	73	81	119
OTU750	39	23	52	10	34	17	14	13	82	0	0	0	0	0	0	0	0	0	0	0	0	0	0	0	0	0	0	0	0	0	0	0	0	0	0	0	0	0	0	0	0	0	1	0	0	0	0	0	0
OTU751	0	0	1	5	6	0	9	0	0	3	0	0	0	1	0	34	0	0	1	0	0	0	14	16	74	1	26	0	0	25	0	0	0	0	0	0	0	0	30	0	69	0	29	0	4	0	0	0	19
OTU752	22	0	1	0	1	0	0	16	13	1	0	0	0	0	0	0	33	48	1	0	0	1	0	9	1	3	31	1	0	64	1	0	95	98	61	22	1	0	52	1	1	0	46	0	28	0	34	0	98
OTU7520	0	0	0	0	0	0	0	10	0	12	0	0	0	2	1	0	23	0	0	0	0	0	0	0	0	0	0	0	3	0	0	39	0	0	0	0	0	0	0	0	0	0	0	30	0	0	57	24	0
OTU753	0	11	3	0	0	0	16	0	1	17	0	0	0	0	23	21	0	0	11	1	0	0	0	1	0	0	0	33	33	0	0	40	0	1	26	0	0	25	0	1	0	0	1	1	1	81	0	1	1
OTU7539	1	1	0	0	10	0	0	0	0	0	0	0	0	0	0	0	1	0	1	0	0	35	1	0	1	0	0	0	0	0	1	19	1	0	0	0	0	0	63	0	80	1	1	0	0	3	0	0	0
OTU754	0	0	0	19	0	22	0	27	0	0	0	0	0	0	0	0	0	0	49	0	0	0	0	0	143	3	0	0	0	0	0	0	0	0	0	0	0	0	0	0	105	0	0	0	22	0	20	0	0
OTU7562	2	0	1	0	0	0	2	0	0	14	15	0	0	0	2	1	0	1	73	16	0	44	46	1	0	1	0	22	0	8	21	0	0	0	0	1	28	1	1	8	1	66	39	47	1	0	21	1	0
OTU757	38	16	18	26	39	18	2	27	10	0	6	0	0	8	4	0	0	1	0	0	0	13	1	2	2	0	0	0	1	22	1	0	4	1	53	0	31	24	0	23	2	0	90	0	0	0	0	1	6
OTU758	0	0	0	0	0	0	0	0	0	0	0	0	0	0	0	0	1	0	0	0	0	29	0	0	0	0	54	25	0	0	0	62	80	0	0	0	0	0	0	1	0	0	0	0	0	0	0	0	52
OTU759	9	1	24	40	21	17	0	30	7	3	0	12	13	0	1	48	35	0	2	0	0	0	39	2	26	0	0	0	24	2	0	0	1	2	1	1	2	0	1	1	7	0	0	0	1	0	62	0	102
OTU7590	14	0	0	1	12	9	6	0	0	0	0	0	13	17	0	1	1	0	0	0	1	0	0	0	0	0	1	0	61	26	0	0	0	0	0	0	0	0	0	0	1	19	38	0	11	3	0	0	56
OTU76	327	356	365	299	320	313	333	488	435	5	3	2	2	14	22	1	4	2	1	3	14	3	10	12	0	3	2	1	0	3	1	2	1	0	2	2	142	1	0	0	0	2	13	1	1	0	0	0	0
OTU760	0	0	14	4	0	0	0	0	18	0	0	0	12	0	117	0	20	0	38	0	62	0	0	30	0	0	0	0	17	15	0	2	0	0	0	0	11	1	0	0	0	0	0	1	12	0	0	0	0
OTU761	28	8	16	8	25	17	6	46	13	0	0	0	0	0	0	0	0	0	0	0	0	0	0	65	0	0	0	0	0	0	0	0	0	48	0	0	0	0	0	0	0	0	0	0	0	0	0	0	0
OTU762	0	10	3	5	5	15	1	10	7	0	20	0	0	1	0	0	0	0	0	1	0	31	34	0	0	0	0	69	0	16	1	1	0	0	0	2	0	1	0	0	0	0	0	0	0	1	0	1	1
OTU7620	33	0	0	0	0	6	0	0	0	0	0	0	0	4	0	0	0	0	0	0	20	0	15	26	0	16	0	0	0	0	0	0	1	0	0	0	0	0	14	41	0	0	0	0	0	0	0	0	0
OTU7625	51	1	27	8	13	7	27	19	60	0	0	5	21	1	2	2	32	70	0	1	35	1	21	0	1	1	1	39	28	37	1	39	1	1	87	67	55	71	61	54	1	0	24	63	5	102	41	0	0
OTU763	15	4	4	0	0	0	0	8	18	10	0	0	0	0	0	54	0	0	0	25	0	1	0	40	0	11	0	0	0	39	0	1	0	0	0	46	0	48	0	39	18	0	0	0	0	0	0	0	0
OTU764	0	0	0	0	0	2	0	0	9	0	0	0	0	0	0	0	0	0	0	25	0	0	0	0	0	0	0	0	0	0	0	0	0	0	0	0	0	0	0	0	0	0	0	0	0	58	41	12	22
OTU765	0	0	1	0	0	0	0	0	0	0	0	0	0	0	21	0	0	0	0	0	0	0	20	0	0	0	0	0	0	1	0	0	47	1	0	0	18	0	0	0	20	0	0	0	0	7	0	0	0
OTU7665	10	0	10	16	7	6	8	3	0	15	0	0	4	20	1	0	48	1	0	69	0	18	16	7	1	60	0	4	0	27	1	1	0	0	0	26	0	16	0	0	0	27	20	0	4	3	1	5	2
OTU7668	17	6	6	0	0	0	8	0	0	2	2	1	2	0	0	0	5	25	21	7	0	19	0	9	0	0	0	16	9	0	0	0	0	0	0	0	1	1	29	0	44	0	0	16	14	2	0	0	0
OTU767	2	0	17	15	12	0	0	5	8	0	0	0	0	1	0	1	1	4	0	0	0	0	45	0	2	0	0	0	0	25	1	0	0	1	0	0	0	43	120	0	0	0	0	1	3	0	0	0	0
OTU7673	0	0	0	0	1	0	0	0	0	0	0	0	0	46	0	0	1	44	0	1	0	1	1	0	0	1	1	0	11	0	0	50	96	0	0	0	0	0	0	42	0	0	0	1	0	0	1	0	95
OTU768	0	0	7	0	0	0	0	0	0	0	0	0	0	16	0	0	0	0	0	0	0	23	0	53	0	1	70	0	6	0	30	33	0	0	0	74	30	37	0	63	42	0	0	0	21	0	28	34	0
OTU769	19	5	15	4	27	11	0	6	35	0	0	0	0	24	0	15	0	0	0	0	0	0	0	0	0	0	0	0	0	0	0	0	0	0	0	1	19	70	0	0	27	17	18	1	0	11	0	0	0
OTU77	64	25	45	21	28	63	35	47	37	13	6	28	13	180	102	15	1	47	56	4	90	25	26	65	23	5	9	52	62	0	82	81	0	47	115	66	5	38	77	2	132	18	0	101	21	31	18	129	0
OTU770	15	0	0	1	0	0	0	0	0	0	0	4	0	0	0	2	1	0	1	2	0	0	15	1	0	0	17	0	0	0	1	1	0	1	48	0	6	1	0	37	0	0	1	9	0	29	0	0	0
OTU7700	0	23	27	0	0	8	7	0	18	0	4	0	13	0	0	21	1	24	55	1	2	8	0	1	0	36	2	0	1	37	0	0	1	1	0	0	0	0	0	0	0	27	40	1	14	3	0	0	40
OTU7704	0	0	7	0	0	3	0	0	0	0	0	0	0	0	43	0	0	48	20	1	0	0	0	0	48	12	0	0	14	0	0	0	72	68	0	0	0	0	0	45	0	15	0	0	0	0	0	0	0
OTU771	54	14	27	7	12	21	17	1	6	1	6	9	30	3	2	37	33	81	1	1	44	53	2	14	20	3	50	45	4	3	77	44	19	113	20	58	21	38	97	126	0	108	22	2	48	25	127	0	61
OTU772	0	10	1	0	15	1	1	0	1	0	0	0	0	0	1	0	0	0	0	53	0	23	0	52	0	1	1	32	17	1	0	1	0	0	24	0	0	0	0	0	0	0	0	0	25	0	0	0	1
OTU773	5	0	7	0	10	5	6	0	0	0	0	0	0	33	0	1	0	22	0	0	0	0	0	0	0	0	0	0	11	1	0	0	1	0	0	0	0	1	1	0	0	0	16	0	0	0	0	26	0
OTU774	2	3	11	15	2	3	2	3	6	1	0	0	0	2	25	1	69	37	0	0	16	24	3	1	69	1	1	2	0	4	0	0	1	0	0	1	22	0	75	0	1	0	0	0	12	0	0	0	0
OTU7744	1	16	0	0	0	0	0	0	0	0	0	0	0	0	0	0	0	29	0	0	0	0	43	0	0	0	35	40	0	0	0	0	0	0	0	0	0	0	65	0	0	0	0	0	0	0	0	0	0
OTU775	14	36	11	9	2	42	1	10	11	9	19	7	0	37	12	3	3	2	30	68	12	8	0	128	59	1	120	4	53	44	56	59	127	0	0	25	33	52	116	0	126	1	99	1	44	0	107	2	37
OTU776	24	11	44	16	0	8	7	0	18	0	10	0	0	0	0	32	1	0	0	2	1	3	1	0	1	0	28	0	4	2	1	0	0	0	1	1	0	2	27	0	0	25	0	1	0	0	0	0	0
OTU778	0	16	6	28	0	3	0	18	28	0	0	1	2	0	0	0	1	1	0	0	0	0	0	0	0	0	0	0	0	0	0	0	1	0	0	0	0	0	0	0	0	0	0	14	0	0	19	0	0
OTU7787	0	0	1	0	8	0	0	0	0	1	0	0	10	0	5	36	10	0	0	0	14	0	0	41	25	0	34	0	0	0	30	0	0	0	0	0	0	0	3	44	0	0	0	0	24	0	0	1	34
OTU779	2	18	8	4	2	4	6	3	2	0	16	0	2	1	1	0	45	0	0	0	1	25	0	0	19	0	51	0	5	1	5	1	27	5	66	2	38	3	1	0	1	0	0	0	0	0	0	38	2
OTU7793	0	13	0	0	9	1	0	0	13	9	0	0	0	1	0	2	0	0	0	0	0	2	0	0	0	0	0	0	3	0	0	0	8	0	40	0	0	0	36	1	0	1	0	0	0	0	0	0	0
OTU78	98	105	103	65	67	67	65	81	99	20	11	4	3	43	47	155	92	90	0	124	36	63	45	0	33	2	43	148	115	116	78	0	115	87	26	67	27	114	101	1	132	38	84	38	76	79	60	149	25
OTU780	0	6	21	0	29	0	0	0	22	0	15	0	0	56	3	40	0	2	0	0	0	0	34	0	34	0	0	23	5	21	0	0	21	0	22	0	0	0	95	74	34	26	73	19	8	82	49	42	0
OTU781	1	0	3	11	1	9	1	0	7	1	0	0	0	0	1	1	2	0	12	1	1	0	1	0	2	4	1	1	0	26	2	29	0	1	0	0	0	19	0	0	0	0	0	1	0	0	47	0	0
OTU782	0	0	0	0	19	0	2	23	0	0	0	6	0	0	0	0	0	0	0	0	1	0	27	11	0	9	0	0	1	0	0	0	0	0	0	27	0	33	1	0	0	78	0	0	0	35	27	0	23
OTU7830	0	0	0	0	0	0	0	0	0	0	0	0	0	0	1	0	0	0	0	0	3	0	0	0	0	0	0	1	0	31	0	0	0	49	1	1	1	0	0	0	0	0	0	0	0	5	33	0	0
OTU784	0	0	0	0	0	3	1	0	0	2	0	0	1	0	0	0	0	0	0	0	39	1	39	0	0	0	0	0	0	38	0	0	0	0	0	0	0	0	0	0	0	0	0	0	0	38	0	0	65
OTU785	8	31	3	21	19	1	0	24	30	22	4	25	0	4	0	0	0	48	27	1	0	31	19	0	0	0	0	89	11	0	0	46	65	0	78	0	74	0	36	33	103	0	0	14	0	20	23	1	38
OTU787	6	1	10	0	1	0	0	11	0	0	0	1	0	0	42	0	1	1	1	35	0	16	0	12	0	0	32	0	0	37	0	0	1	0	2	34	1	0	47	0	0	1	0	0	24	0	0	0	0
OTU7871	0	0	0	1	1	0	0	0	1	0	0	1	10	0	34	1	45	0	0	1	0	0	0	0	0	1	5	0	33	0	0	1	0	1	59	0	1	0	0	0	0	35	0	31	1	38	0	0	0
OTU788	0	16	7	5	7	6	8	0	1	1	0	0	0	5	0	0	4	2	53	2	20	0	12	30	1	3	1	1	1	2	2	1	2	0	52	0	3	1	1	51	36	0	1	64	65	76	36	91	0
OTU7884	0	0	0	0	0	0	4	0	0	1	0	10	0	1	46	1	38	0	1	0	30	0	0	17	0	0	0	0	2	0	0	0	0	51	2	22	0	22	0	0	0	0	0	0	0	0	0	0	67
OTU789	14	14	0	8	0	0	0	0	21	0	0	1	20	40	0	0	0	0	0	0	0	0	0	0	0	0	0	1	0	0	0	88	1	0	41	337	0	18	0	0	0	0	0	0	0	22	0	48	54
OTU7891	0	0	1	0	0	10	0	0	0	0	0	0	1	0	0	29	0	0	0	0	0	0	0	0	0	0	0	0	0	0	0	0	0	2	0	0	0	0	24	0	0	3	0	0	0	0	29	0	1
OTU7892	0	0	0	0	0	0	4	0	0	0	0	0	0	3	35	1	52	0	0	2	0	1	1	4	0	1	0	2	4	0	49	0	0	51	0	2	0	0	45	0	0	0	1	0	15	0	52	0	0
OTU79	137	148	151	119	108	120	125	141	184	0	1	1	1	1	1	0	3	2	1	0	0	0	0	0	0	0	0	0	3	0	0	1	0	0	0	0	1	1	19	0	0	1	1	0	3	18	1	0	0
OTU7909	8	0	0	8	1	4	12	0	0	0	0	5	0	0	0	0	24	0	0	0	0	28	19	0	0	0	0	0	0	0	47	0	0	0	0	0	0	0	0	0	0	0	0	25	0	0	0	0	2
OTU791	32	20	5	9	41	11	26	7	0	0	0	0	0	0	0	0	0	0	0	0	0	0	0	0	0	0	15	0	0	0	0	0	0	0	0	0	0	0	0	0	0	0	0	27	0	0	0	0	0
OTU7918	24	14	54	9	9	14	0	28	4	0	2	0	0	0	0	39	2	0	0	1	0	0	0	0	28	1	0	0	15	0	0	0	0	0	0	1	24	0	0	53	0	0	10	0	0	0	154	0	0
OTU793	1	11	17	11	10	26	4	25	19	20	0	0	10	22	15	0	43	0	0	0	1	5	0	1	0	1	0	1	11	36	53	36	37	48	0	2	0	1	64	3	3	1	1	28	0	0	0	0	0
OTU7931	13	10	21	14	21	17	10	30	7	0	1	0	0	0	0	0	0	0	0	0	0	0	0	0	0	0	0	0	1	0	0	0	0	0	0	0	0	0	0	1	33	0	0	0	1	0	0	0	0
OTU7934	0	0	2	2	3	0	0	1	0	4	2	0	0	26	0	0	4	12	0	1	0	7	0	1	1	13	38	8	14	1	0	0	42	2	0	26	1	0	0	46	0	0	0	0	0	0	0	0	19
OTU794	0	0	0	0	3	0	0	14	0	0	0	0	0	0	0	43	0	0	0	0	0	0	0	0	0	0	0	0	28	98	49	0	1	0	0	0	0	0	0	38	0	0	0	25	0	0	0	0	0
OTU795	8	17	13	4	9	12	4	1	6	0	0	0	0	2	0	29	0	0	0	1	0	19	0	13	0	0	0	1	26	0	0	0	0	0	0	0	0	0	0	1	12	0	0	1	57	1	0	0	1
OTU7950	0	6	20	0	13	9	0	5	12	0	31	1	0	0	0	78	0	0	0	0	46	0	0	31	0	0	46	57	11	0	1	59	0	1	48	2	0	0	90	38	0	0	0	49	0	0	35	34	0
OTU7961	7	3	1	0	13	17	1	4	14	0	12	0	0	1	0	1	1	0	1	1	12	18	1	0	39	1	1	0	14	46	0	12	62	9	0	1	14	0	0	1	0	0	26	0	0	22	0	1	0
OTU797	0	4	0	0	16	1	6	7	0	0	7	1	0	30	0	0	24	24	0	0	0	0	0	0	0	0	14	0	10	1	0	29	0	27	1	0	0	0	43	0	0	0	55	0	23	1	0	21	85
OTU798	14	3	0	5	0	7	0	15	7	0	0	6	13	26	25	8	43	45	0	0	0	0	0	12	9	28	0	0	0	20	0	40	0	1	26	0	0	0	0	29	26	0	0	0	0	41	0	0	0
OTU799	6	1	0	0	0	0	0	0	1	0	0	8	0	1	0	2	28	0	1	0	0	0	0	1	0	2	1	0	52	0	0	0	1	0	0	0	1	0	0	0	0	0	0	0	106	0	0	17	0
OTU8	191	307	331	230	206	212	160	313	220	642	969	781	905	1945	2662	2573	2943	3122	2846	2786	2750	2004	1590	2230	3830	2192	2831	3815	5211	1916	3479	3478	4029	4019	3603	2998	2673	3661	3267	3472	3534	2245	3141	3170	1656	3337	3252	3279	3920
OTU80	362	294	247	290	245	285	242	367	285	0	2	1	0	0	2	0	3	11	3	0	0	3	4	1	2	1	0	0	9	0	1	0	0	0	2	4	0	0	0	0	0	19	1	0	1	0	0	0	0
OTU800	0	0	0	0	0	0	0	0	0	0	0	8	8	0	2	0	1	0	0	0	0	0	0	0	0	0	0	0	0	52	0	0	0	0	0	0	0	52	0	1	0	0	0	0	0	0	15	18	0
OTU801	12	0	1	0	3	0	6	2	0	1	0	1	0	1	1	65	3	1	1	0	74	1	1	20	0	0	2	0	1	0	1	18	0	14	0	3	0	0	0	2	0	0	20	0	11	0	43	0	0
OTU802	0	0	21	0	4	1	16	26	0	0	0	0	0	0	14	0	1	0	1	92	23	0	1	1	32	0	3	0	0	42	0	0	0	0	37	0	0	5	0	0	0	21	0	1	1	1	0	9	0
OTU803	0	0	3	43	0	8	1	1	17	7	0	1	0	11	1	0	51	1	0	0	0	0	0	52	36	25	0	1	36	12	1	0	0	1	1	22	0	0	0	0	0	0	0	0	0	0	0	39	0
OTU804	0	0	5	2	0	4	14	11	7	0	0	0	0	1	1	1	24	41	29	1	0	1	0	41	0	0	0	0	0	0	0	1	0	0	0	9	0	4	72	1	1	7	0	1	0	0	3	59	0
OTU805	19	6	7	4	23	4	13	0	28	0	0	0	0	0	0	0	0	0	0	0	0	0	0	0	0	0	0	0	0	0	0	0	0	0	0	0	0	0	0	0	0	0	0	0	0	0	0	0	0
OTU806	9	0	19	0	0	0	0	0	9	0	0	0	4	2	23	0	1	0	0	0	35	0	5	15	23	0	0	53	16	0	0	0	0	10	0	0	0	0	0	1	45	24	0	0	80	43	0	0	0
OTU8067	0	0	0	6	3	11	1	12	12	0	12	0	0	0	1	0	0	0	0	0	0	0	0	0	0	0	0	0	4	0	0	25	0	0	0	0	16	36	34	0	0	0	0	0	0	0	43	0	0
OTU807	0	7	20	0	4	16	0	4	13	0	10	0	0	0	0	144	52	0	0	0	0	0	0	0	9	0	1	34	12	13	0	1	1	47	0	33	0	0	0	0	0	0	0	0	15	0	0	0	0
OTU808	0	0	0	0	0	1	0	0	0	1	0	2	0	0	30	0	0	0	0	0	0	0	15	0	0	25	0	1	1	0	0	0	3	0	26	1	0	0	1	3	78	0	29	0	23	0	45	42	1
OTU8083	0	2	5	0	0	13	0	1	0	1	0	1	0	1	33	0	0	1	0	2	0	3	20	2	4	0	0	1	1	0	1	1	0	56	1	40	1	0	0	0	0	1	0	0	7	1	0	0	2
OTU809	35	7	19	13	0	23	0	31	8	1	1	0	0	1	0	0	1	0	0	0	0	1	0	0	0	0	0	0	0	0	0	0	0	0	0	0	0	0	0	0	0	0	0	1	0	0	0	0	0
OTU81	103	143	70	75	71	160	179	157	47	33	49	78	53	39	105	160	66	15	90	233	62	56	143	83	102	56	66	39	268	254	198	82	172	96	102	73	70	22	90	234	209	87	193	46	307	107	100	173	139
OTU811	5	10	0	21	0	0	0	0	0	1	1	5	0	20	0	0	0	0	0	0	0	0	0	0	0	0	0	0	0	18	0	22	0	0	0	0	0	21	0	0	0	0	0	35	0	0	30	0	0
OTU812	0	15	4	9	0	8	2	3	0	0	13	0	0	0	0	1	0	4	0	0	0	0	0	0	0	0	0	0	0	19	0	0	0	0	0	0	0	0	0	0	0	0	0	0	0	0	25	0	0
OTU8123	0	1	1	3	1	0	0	0	2	1	0	0	0	1	2	3	2	1	1	0	1	0	0	1	6	0	0	1	31	0	1	7	4	1	0	0	1	0	88	1	0	0	0	0	1	0	0	1	0
OTU813	12	1	1	1	0	3	7	28	18	0	0	0	1	1	1	0	50	0	0	1	2	2	22	0	38	0	22	1	8	0	4	4	34	1	1	30	0	0	0	0	2	1	22	0	15	1	33	23	1
OTU814	0	0	0	1	1	11	15	0	0	22	0	0	13	88	0	0	23	0	0	0	26	0	37	0	0	15	0	0	7	0	0	0	0	25	51	0	25	85	0	40	0	0	0	0	0	0	0	21	0
OTU815	0	0	0	0	0	2	0	0	0	0	5	0	0	0	0	23	21	1	0	1	2	39	0	35	0	0	18	26	19	0	0	10	28	0	0	0	24	0	24	32	35	0	25	0	51	33	31	37	0
OTU816	0	0	0	0	10	0	19	11	0	0	0	0	0	9	0	0	0	0	0	0	0	0	0	48	12	13	1	0	0	0	0	0	0	0	0	0	0	0	0	0	0	0	0	0	2	0	0	26	0
OTU8169	10	2	1	16	21	4	1	1	8	3	9	1	0	17	0	0	0	18	12	18	0	0	0	0	10	0	6	29	4	0	49	2	0	7	0	0	2	2	0	29	0	3	5	24	0	27	32	0	1
OTU817	7	22	3	14	0	8	15	6	30	4	0	0	0	0	17	28	0	5	13	1	0	0	0	0	0	2	0	2	0	11	1	0	59	0	0	0	0	17	0	57	3	1	0	1	71	0	0	56	0
OTU818	0	0	0	0	0	0	0	0	0	0	0	0	1	1	0	0	0	0	0	0	0	0	0	0	0	0	0	0	0	0	0	0	0	0	0	0	48	48	0	0	0	0	0	0	31	0	58	0	0
OTU82	22	41	103	12	65	17	27	0	64	9	33	0	17	20	141	27	402	66	115	1	35	60	35	227	24	248	714	102	78	26	166	57	147	27	133	73	2	88	61	28	50	41	59	125	22	141	237	64	83
OTU820	46	0	30	10	5	36	11	2	4	0	5	11	7	3	3	72	6	125	76	41	105	0	20	0	5	65	2	33	17	18	2	0	82	1	0	1	3	0	1	60	56	0	0	0	54	0	0	49	0
OTU821	3	8	0	3	23	7	0	23	0	8	9	3	6	2	0	11	0	1	0	1	25	20	58	0	0	0	0	1	0	16	17	0	17	25	0	23	0	50	18	0	82	0	27	59	15	1	1	0	0
OTU822	0	0	8	0	11	15	0	17	0	0	0	0	0	0	23	0	22	0	0	45	0	0	1	1	0	0	0	47	0	19	17	1	0	0	86	24	0	41	0	51	0	0	0	0	0	0	5	1	12
OTU824	0	0	0	0	0	0	7	6	0	0	0	0	0	17	4	46	3	0	0	0	0	38	0	1	0	0	2	0	33	22	0	0	23	0	15	1	0	0	69	37	0	1	0	0	0	0	0	0	16
OTU825	0	1	0	1	0	1	0	0	3	0	0	0	0	72	0	43	12	0	0	65	0	1	1	0	0	1	0	0	7	0	46	0	1	0	1	25	12	45	0	0	0	9	1	0	0	0	0	2	4
OTU826	0	19	0	0	0	0	0	0	0	0	0	0	21	0	0	1	0	0	63	0	0	12	0	0	1	6	0	0	0	0	45	46	0	52	1	0	30	1	0	0	0	30	0	0	32	36	2	0	101
OTU828	5	4	0	8	0	18	2	11	22	0	0	0	0	0	1	0	0	0	0	0	43	1	0	10	0	0	38	0	11	0	0	1	0	0	0	0	0	43	44	1	0	0	0	0	17	0	0	32	0
OTU829	0	0	4	9	0	3	0	0	0	0	10	0	0	21	0	0	0	0	0	0	2	0	0	0	0	0	0	0	11	0	9	20	0	0	0	0	0	0	0	0	0	0	0	16	0	0	0	29	0
OTU83	70	91	72	171	87	164	109	101	89	40	38	17	6	106	142	95	49	77	225	81	81	62	167	195	42	157	57	158	170	181	306	106	14	128	159	25	142	307	217	129	24	20	250	47	361	236	88	238	147
OTU830	0	0	0	3	0	0	0	0	0	13	0	6	0	15	0	23	0	1	69	1	0	15	0	21	28	0	0	14	14	0	0	0	0	0	0	0	0	0	0	0	0	0	88	0	0	0	0	22	21
OTU8304	23	22	15	14	0	6	0	8	1	4	0	6	0	9	3	97	1	3	30	24	0	18	1	0	84	15	13	1	25	38	45	2	41	1	1	33	1	41	27	2	1	31	6	1	32	0	43	44	0
OTU8318	0	1	0	0	0	0	0	0	0	0	0	0	0	0	0	0	28	0	48	18	0	12	0	42	0	0	0	0	0	14	0	0	43	0	0	0	0	0	0	0	0	0	42	0	0	0	0	0	0
OTU833	1	13	4	6	21	2	4	8	3	1	0	0	0	0	0	60	0	0	39	1	0	0	0	20	26	0	0	0	0	0	0	1	71	15	0	0	22	0	0	0	0	0	82	0	0	7	0	0	0
OTU834	8	6	0	1	1	0	0	0	1	3	0	0	0	16	19	1	14	0	0	0	0	0	0	45	12	0	0	0	23	19	0	67	0	0	0	0	0	5	1	0	119	2	0	0	2	2	0	0	3
OTU836	40	5	4	67	8	13	0	10	4	0	0	0	0	0	0	0	1	0	0	0	0	0	0	0	0	0	0	0	0	0	0	0	0	0	0	0	0	0	0	0	0	0	0	2	0	0	0	0	0
OTU837	9	0	7	4	32	37	7	26	7	8	0	18	0	1	0	0	54	36	0	0	0	19	1	15	63	26	0	47	8	0	27	0	0	48	54	0	0	2	107	37	12	11	0	9	18	0	24	32	1
OTU8374	9	0	1	0	0	0	9	1	15	0	0	0	0	2	35	0	3	1	3	0	0	0	1	0	0	2	1	0	12	16	0	0	1	24	0	0	3	20	34	0	1	4	24	0	6	0	0	0	0
OTU8389	18	0	0	0	0	0	0	0	0	0	1	0	0	1	0	1	1	0	0	25	0	1	2	0	0	1	23	2	3	16	0	0	0	0	0	0	1	0	0	0	0	0	0	0	54	0	0	0	1
OTU839	11	0	13	11	5	21	26	0	20	5	0	0	22	0	56	0	0	0	0	0	0	19	1	42	6	0	0	0	21	20	0	0	0	0	0	89	26	1	0	2	4	1	0	1	20	0	0	0	30
OTU84	46	77	110	20	72	76	104	110	55	45	61	2	60	57	37	174	114	10	6	128	96	75	62	97	141	41	47	53	93	160	133	38	77	162	69	72	21	27	48	121	2	46	247	60	65	236	51	101	90
OTU840	0	0	0	0	0	5	12	13	0	0	0	0	0	1	0	0	0	0	0	51	13	0	0	0	0	0	52	46	22	0	0	36	33	0	55	0	0	0	27	0	0	77	0	0	30	0	0	0	0
OTU841	0	0	0	0	0	4	0	0	0	0	0	0	0	0	0	0	51	0	1	0	1	0	0	0	0	0	0	0	3	0	0	0	0	0	0	0	25	23	33	38	0	0	0	0	0	0	0	0	0
OTU842	0	3	2	13	1	4	9	4	10	0	0	0	0	34	11	0	34	49	104	1	0	36	0	24	0	0	27	25	12	62	0	32	0	0	64	19	0	37	0	14	105	0	33	1	49	25	25	40	189
OTU8427	1	0	20	0	0	0	4	1	0	0	0	0	8	1	2	69	2	32	0	46	0	3	1	0	1	0	29	1	0	0	0	0	2	8	1	0	0	1	0	2	59	1	85	0	0	0	0	0	0
OTU843	7	0	8	20	14	17	13	0	16	0	7	12	0	1	0	1	14	0	35	0	1	69	0	0	0	0	0	0	0	1	0	0	1	2	0	1	26	0	0	0	0	1	0	0	23	0	0	0	0
OTU844	13	0	0	3	0	0	0	0	31	0	0	0	0	0	0	0	0	0	0	74	0	38	0	0	0	17	42	4	42	0	0	28	0	1	0	81	0	0	50	0	46	85	0	32	0	0	1	0	0
OTU845	23	3	15	0	10	0	7	5	0	22	0	0	24	0	56	31	0	0	9	30	16	39	0	15	34	44	0	156	5	0	29	0	0	0	1	1	0	41	33	54	0	0	31	0	0	0	31	39	22
OTU846	1	23	0	16	0	4	13	0	10	0	0	1	0	1	0	0	1	1	0	1	0	32	27	0	0	37	0	0	12	0	0	0	19	0	0	1	23	22	0	36	1	16	0	0	50	29	0	0	29
OTU847	0	48	26	4	15	8	30	8	72	0	2	0	8	42	2	0	12	1	3	0	1	0	1	1	2	0	4	0	9	72	0	3	1	0	0	2	0	1	0	0	1	1	2	1	2	0	0	47	0
OTU849	0	10	0	0	13	1	0	0	1	11	0	2	0	0	0	0	34	38	1	42	0	0	2	3	1	8	1	35	45	0	43	25	0	0	15	0	24	63	74	1	0	0	0	27	0	0	0	0	1
OTU85	86	76	53	120	87	56	84	102	34	44	28	16	14	86	28	61	90	7	18	41	97	66	33	44	178	11	90	136	28	84	87	43	242	4	4	92	47	69	88	44	117	63	25	98	88	133	4	63	55
OTU850	0	0	0	0	0	4	0	0	0	0	0	0	0	0	0	55	0	0	0	0	33	0	13	0	0	0	0	0	5	9	14	0	0	0	0	40	0	0	103	1	0	0	0	0	0	0	0	15	20
OTU851	0	0	0	0	0	0	0	8	0	0	0	2	10	0	0	43	0	0	0	0	33	0	1	0	0	0	0	3	7	37	29	0	1	0	0	22	0	0	0	95	0	0	0	0	26	0	0	0	0
OTU853	19	7	27	34	32	17	13	20	46	0	7	3	25	36	26	1	35	10	40	56	0	48	24	12	4	14	2	16	59	1	1	70	0	2	35	3	26	1	58	0	4	10	40	2	11	52	10	0	1
OTU854	2	2	34	24	2	32	0	2	1	1	1	2	0	44	23	43	3	3	4	1	6	3	3	44	2	21	2	3	0	1	4	3	3	3	1	75	3	3	1	0	2	1	2	0	25	0	1	0	36
OTU855	0	0	13	5	0	1	8	3	0	0	0	1	0	0	27	21	0	0	86	0	0	0	0	0	0	0	0	0	0	0	52	0	0	30	0	1	0	1	34	33	0	1	21	0	27	0	0	26	0
OTU856	1	21	9	24	31	19	44	8	53	0	7	7	16	27	120	86	36	3	5	84	123	3	110	59	2	27	146	2	47	112	82	0	214	187	4	86	30	4	22	51	100	1	52	44	41	41	1	82	70
OTU857	11	0	0	7	0	0	16	6	0	0	0	0	0	0	2	0	0	0	0	0	0	0	64	0	0	0	0	0	22	0	0	0	57	0	63	1	0	0	0	0	0	0	0	0	0	0	33	12	13
OTU8572	0	0	0	8	0	6	8	0	13	0	0	9	0	1	0	17	23	72	0	0	40	0	0	0	0	1	0	0	1	0	0	0	0	0	1	2	1	0	0	0	1	0	16	0	1	2	9	70	0
OTU858	0	9	3	1	3	1	0	4	3	3	0	0	0	50	0	0	3	0	0	0	0	0	0	0	0	0	0	0	0	0	1	0	0	0	0	0	100	0	1	0	0	0	6	1	9	18	0	0	0
OTU8583	0	0	0	0	0	0	0	0	0	0	0	0	0	0	55	43	0	25	0	0	0	0	0	0	32	0	0	0	25	40	67	0	2	0	0	25	0	0	0	31	0	0	0	0	19	0	0	1	28
OTU859	0	42	34	50	0	23	14	21	37	3	0	10	1	79	32	65	1	1	64	66	6	0	1	12	22	1	1	0	31	48	1	24	2	19	32	24	0	5	29	1	0	17	50	0	39	50	28	74	6
OTU86	209	164	254	138	208	254	290	148	204	27	1	4	5	76	25	28	114	5	144	36	27	47	137	49	20	11	86	44	26	19	91	249	34	5	28	811	23	130	7	67	33	170	39	25	72	0	0	48	53
OTU860	35	35	27	27	3	14	21	39	47	0	0	0	0	0	0	0	0	0	0	0	0	0	0	0	0	0	0	0	0	0	0	0	0	0	0	0	0	2	0	0	0	0	0	0	0	0	0	0	0
OTU8605	13	12	0	1	33	5	17	0	0	0	6	0	4	17	1	21	0	0	0	38	0	0	0	2	0	0	0	0	0	0	38	0	3	28	1	0	15	0	43	0	1	1	0	0	0	0	0	0	0
OTU861	16	18	0	9	25	10	9	32	6	0	0	0	0	0	0	0	0	5	0	0	0	0	0	0	0	0	0	0	0	0	0	0	0	24	0	0	0	0	0	0	0	0	0	0	0	0	0	0	0
OTU863	0	2	7	0	16	1	2	20	2	0	0	6	0	20	2	0	0	0	0	0	24	31	33	0	0	0	76	67	23	0	43	55	33	0	0	0	28	0	0	34	0	0	0	0	0	1	1	1	0
OTU864	0	0	0	0	0	4	0	0	0	0	0	1	0	0	0	2	0	0	0	72	43	13	0	0	0	0	0	0	15	0	0	0	0	14	0	0	0	0	0	0	36	1	0	0	0	0	0	0	0
OTU865	0	0	1	0	25	1	6	0	0	2	0	0	8	13	0	0	0	1	31	41	0	44	0	0	1	0	1	0	38	66	0	0	5	0	0	0	27	0	0	52	0	0	49	0	0	0	0	0	0
OTU866	6	15	0	0	27	14	4	35	0	0	22	0	24	22	97	1	130	0	1	30	18	1	0	0	5	23	1	59	85	15	46	36	39	46	0	1	6	0	0	97	42	21	27	32	44	1	153	0	0
OTU869	3	0	3	9	4	9	5	8	10	14	2	12	14	0	12	0	0	1	0	1	10	16	31	27	21	29	0	0	4	46	25	111	0	58	21	0	0	0	1	21	0	0	0	0	4	40	31	0	19
OTU8695	0	0	17	1	5	0	16	7	14	0	0	0	4	22	1	0	0	0	20	0	0	11	0	0	1	0	1	0	0	0	2	0	0	0	37	1	0	0	0	1	18	0	40	0	14	0	0	0	1
OTU87	147	112	146	112	50	63	75	95	146	0	1	3	9	10	0	0	0	16	0	0	0	0	1	0	0	0	0	1	1	1	2	0	1	43	1	0	0	0	0	0	0	3	0	0	8	0	0	0	0
OTU870	8	16	9	0	0	0	0	0	0	0	0	0	0	0	0	0	18	0	0	0	0	0	0	0	61	0	0	0	0	0	0	1	0	36	0	74	0	0	0	0	0	0	0	0	0	0	0	0	0
OTU871	0	0	0	0	0	0	0	0	0	0	0	14	0	0	0	34	0	32	34	1	0	0	0	0	0	0	0	0	40	14	44	15	0	0	0	0	0	1	0	0	0	0	0	0	0	73	29	0	0
OTU873	24	12	0	18	0	12	0	0	2	0	0	0	0	0	1	2	29	0	91	0	24	1	0	0	34	0	0	37	0	0	24	0	13	0	0	0	0	44	0	59	4	16	0	0	38	0	0	0	0
OTU8732	1	1	1	1	1	1	1	0	0	0	0	13	3	0	30	11	21	2	0	0	43	2	1	2	3	2	15	0	11	0	0	2	1	0	1	1	2	0	0	0	1	0	0	0	19	1	1	89	5
OTU8735	0	0	0	0	0	0	0	0	0	0	5	0	0	0	0	0	0	4	0	0	1	0	1	22	42	1	1	1	12	37	0	0	0	0	0	0	0	0	0	0	0	0	0	0	0	0	0	50	0
OTU874	4	2	6	0	5	8	0	4	0	9	0	0	0	0	0	0	5	0	1	0	0	0	37	1	12	0	0	0	0	28	55	33	0	0	0	0	0	0	0	51	0	0	0	0	0	22	0	0	0
OTU875	27	24	54	72	58	23	37	42	49	0	0	0	0	1	0	2	1	1	0	0	1	16	0	0	2	0	0	0	0	0	1	0	0	0	0	0	0	67	0	0	0	1	1	0	13	0	0	0	19
OTU877	0	17	0	48	10	12	2	0	23	0	0	0	0	0	59	21	0	71	16	3	0	0	2	0	0	0	37	40	42	0	0	0	0	0	0	42	0	0	0	0	0	0	1	0	15	0	0	2	0
OTU879	0	4	0	0	0	0	2	0	0	0	0	0	6	25	14	0	0	0	0	0	22	0	0	26	0	0	1	0	0	0	0	0	0	0	0	0	0	0	0	0	0	31	0	0	0	0	18	61	0
OTU88	1	17	35	36	5	50	37	53	32	6	31	28	19	86	0	99	65	78	71	50	125	114	0	99	25	18	47	130	28	12	118	42	74	156	46	89	94	113	0	130	1	357	50	203	36	106	114	57	23
OTU882	0	0	0	0	0	0	0	7	0	0	0	5	4	22	9	0	0	0	0	0	0	0	22	1	0	0	0	0	14	0	0	0	2	23	0	0	0	67	16	0	0	0	0	0	0	1	0	29	0
OTU883	24	23	36	5	0	9	15	0	28	0	0	0	0	0	0	0	0	0	0	0	0	0	0	0	0	0	0	0	0	0	0	0	0	0	0	0	0	0	0	0	0	0	0	0	0	0	0	0	0
OTU8835	0	0	11	0	5	0	17	0	0	0	0	0	0	0	0	0	0	0	0	0	0	0	4	0	0	10	0	12	0	23	0	18	1	0	0	0	0	0	0	0	0	0	0	1	3	0	0	43	1
OTU8839	82	110	140	75	160	129	125	134	93	7	4	3	82	0	2	41	25	38	80	1	2	0	12	39	0	1	2	53	38	1	145	1	78	32	44	42	29	3	0	32	2	2	31	103	16	225	385	74	100
OTU884	27	1	5	7	10	0	0	0	10	7	27	3	0	35	0	0	33	0	0	0	13	9	17	0	1	0	16	83	7	47	47	37	0	0	0	0	17	0	0	1	1	14	11	0	34	1	19	0	54
OTU886	17	5	12	1	12	13	1	7	5	15	0	5	0	0	0	0	1	0	27	0	0	1	14	25	1	1	33	2	23	0	1	0	0	39	0	0	0	6	0	0	1	0	1	2	22	40	0	0	37
OTU887	10	9	0	1	18	1	22	31	25	0	5	10	0	42	1	7	0	33	35	46	16	7	0	41	1	0	69	1	13	63	63	68	40	2	20	1	28	40	1	0	30	0	25	1	55	0	45	2	1
OTU889	0	3	0	5	0	14	8	0	0	0	0	0	0	0	0	0	0	35	0	47	0	0	0	50	0	0	0	0	0	0	0	2	1	40	0	0	0	0	0	70	97	1	0	0	0	1	0	0	56
OTU89	94	38	99	83	24	70	116	76	99	1	0	9	27	95	1	106	3	56	1	17	1	1	0	1	7	0	131	85	52	13	13	29	0	92	114	19	1	45	33	83	112	24	45	2	46	87	0	4	30
OTU890	15	16	3	7	1	32	13	17	42	0	0	11	16	0	1	40	3	0	0	32	22	18	0	1	32	2	47	0	9	70	55	0	0	3	0	0	25	16	0	0	4	1	0	0	14	27	38	70	1
OTU891	32	17	23	13	0	13	5	21	5	0	0	0	0	0	0	0	0	0	0	0	0	0	0	0	0	0	0	0	1	0	0	0	0	0	0	0	0	0	0	0	0	0	0	0	0	0	0	0	0
OTU892	0	0	8	0	0	0	9	10	0	0	0	0	0	0	1	20	0	0	0	0	22	0	15	0	0	22	0	0	0	0	38	0	0	0	0	0	0	0	30	1	23	13	0	25	17	0	0	0	0
OTU8927	0	0	10	3	1	3	2	4	0	14	0	0	12	27	33	0	0	1	0	0	36	1	1	1	12	0	0	0	0	1	50	0	0	0	0	0	0	42	0	21	1	1	12	0	7	0	0	99	39
OTU894	3	0	0	0	0	0	0	1	1	0	0	0	0	0	0	0	0	26	0	0	0	0	75	47	0	0	18	0	1	0	0	0	0	0	0	0	0	0	23	34	0	0	28	25	0	0	0	0	0
OTU896	8	0	8	0	7	4	9	27	9	0	0	0	0	1	0	0	0	0	43	0	0	0	1	0	51	0	1	2	12	0	1	0	0	0	62	0	0	0	0	0	28	0	0	0	0	0	0	0	0
OTU897	11	0	2	8	21	2	6	1	5	0	10	7	1	5	58	2	62	4	9	0	27	20	2	38	79	38	2	0	0	10	0	1	0	43	3	1	52	85	1	47	1	13	1	0	47	2	0	0	14
OTU898	5	15	17	23	9	21	8	5	6	0	16	15	0	0	0	0	0	0	9	0	36	32	0	24	0	0	0	0	0	0	0	0	0	0	0	0	59	0	0	0	0	0	0	0	0	0	0	33	0
OTU899	0	0	9	0	16	4	0	0	0	0	0	4	0	0	7	35	0	17	0	50	0	12	31	0	0	0	0	0	2	0	68	52	0	0	0	145	0	0	0	0	0	0	19	0	41	28	31	1	0
OTU8991	0	0	0	0	2	0	13	3	0	0	0	0	0	0	0	0	1	0	0	0	0	0	0	0	45	0	0	1	0	0	0	0	55	0	0	0	26	0	39	0	0	0	0	0	0	1	0	0	0
OTU9	868	187	181	173	174	301	310	102	431	7999	5539	5472	14735	1503	2210	193	212	941	1322	728	293	497	540	1137	1254	879	760	6	16	1	2	0	0	6	3	2	70	118	188	35	56	84	95	81	98	0	0	1	0
OTU90	411	475	326	398	392	324	309	518	433	3	5	1	6	5	28	2	1	3	1	3	2	5	1	1	0	1	2	0	17	5	2	55	1	2	28	3	10	27	2	0	1	0	0	0	0	0	0	0	0
OTU900	0	0	0	0	0	0	11	0	0	0	0	0	0	0	0	0	1	55	39	0	0	0	0	0	0	0	0	76	0	0	0	0	31	0	0	0	0	0	59	0	0	0	0	35	25	7	14	0	0
OTU901	0	0	0	0	0	9	0	0	0	0	0	0	0	0	65	56	55	1	0	0	0	1	0	34	0	0	0	0	37	63	0	0	117	0	1	0	0	0	0	0	0	0	0	0	0	1	0	0	126
OTU902	0	0	0	0	8	0	0	0	0	0	0	0	0	30	1	0	1	0	0	0	0	0	0	0	0	0	42	0	0	38	0	0	0	0	0	0	1	0	35	0	1	0	48	0	0	0	0	0	0
OTU905	0	0	25	6	0	6	20	0	6	0	0	0	1	0	1	0	8	20	3	0	15	0	0	0	0	0	0	0	0	0	0	0	0	0	37	1	0	0	1	2	0	0	29	0	0	0	0	0	18
OTU906	3	0	5	7	15	7	40	4	37	0	0	0	0	1	0	28	23	0	0	63	0	3	0	0	1	0	1	1	2	0	45	0	0	0	0	0	0	0	0	0	0	0	0	0	0	0	0	0	0
OTU907	16	0	36	6	0	0	0	12	12	13	0	0	0	0	1	1	0	0	33	0	1	27	0	0	0	0	0	0	0	0	44	0	0	0	0	1	0	0	0	0	63	0	0	78	11	45	0	0	0
OTU91	30	8	42	25	17	42	16	23	35	27	0	10	1	89	48	31	26	22	1	1	32	39	2	64	31	0	50	44	80	126	104	48	112	82	15	200	0	2	57	121	1	12	31	30	1	40	40	42	101
OTU9129	0	0	0	0	0	0	0	0	0	0	0	1	0	2	0	1	0	72	55	32	0	0	0	1	0	0	32	2	2	0	28	0	0	0	0	102	0	1	0	0	0	0	0	1	0	0	0	0	0
OTU913	11	12	2	22	8	3	2	3	10	1	0	1	3	1	0	0	26	0	24	0	36	1	0	0	1	1	1	35	0	20	31	0	0	0	56	1	11	0	0	1	47	18	0	0	1	15	35	0	10
OTU9139	12	0	27	18	0	0	5	31	46	0	0	0	0	12	0	32	0	0	0	10	1	16	0	0	0	0	2	8	0	0	0	0	14	0	0	0	1	0	0	0	0	1	0	3	0	0	0	0	0
OTU916	14	3	21	0	11	0	2	1	2	0	0	0	16	14	1	47	14	2	6	0	2	0	13	21	0	16	117	1	0	9	0	1	0	25	16	43	9	0	8	53	2	15	54	1	2	35	64	42	0
OTU917	0	1	1	16	0	6	2	0	0	0	1	0	0	3	11	31	0	0	0	1	0	0	1	42	39	2	0	0	12	43	1	1	0	75	2	2	0	18	1	0	37	2	36	51	69	0	0	66	20
OTU918	0	16	12	0	0	1	9	38	7	0	0	0	18	1	80	1	61	82	1	0	34	0	20	0	0	4	72	26	19	2	37	0	90	0	0	3	68	4	45	0	0	43	39	1	10	3	84	0	1
OTU919	5	0	9	5	0	10	0	9	12	0	0	0	6	0	0	2	0	60	0	35	0	0	0	0	29	13	26	32	7	0	0	0	0	36	0	37	0	31	0	0	0	0	0	0	0	0	0	0	0
OTU92	137	196	218	333	319	217	190	153	170	2	2	2	1	3	0	2	1	1	0	0	1	1	0	0	0	0	0	0	0	20	1	1	0	1	0	0	1	0	1	0	0	0	0	0	0	0	0	0	0
OTU920	38	19	0	33	10	51	60	4	41	0	0	0	4	12	0	8	1	0	29	0	32	0	0	0	0	9	0	0	0	1	0	46	0	1	0	67	0	0	0	0	1	3	0	0	7	0	0	0	12
OTU9205	42	18	22	58	12	31	20	38	48	1	0	0	2	0	0	0	1	1	0	0	1	0	2	0	0	0	0	0	0	0	2	0	0	0	0	1	0	0	0	0	0	1	0	1	0	0	0	0	0
OTU9211	18	9	17	17	23	22	14	10	9	6	18	1	24	20	18	0	0	0	24	0	18	7	8	17	0	0	0	0	12	11	0	25	0	0	0	0	1	0	36	0	0	0	20	2	16	0	1	0	0
OTU922	0	0	19	2	0	1	2	0	9	0	0	2	8	1	0	20	2	0	0	67	26	0	0	0	29	0	0	16	23	0	0	0	0	8	0	1	54	0	0	2	44	0	0	0	98	0	1	0	0
OTU9232	1	0	5	0	9	0	1	0	0	3	0	0	0	0	0	0	0	1	1	0	0	1	0	2	0	0	0	61	1	14	0	0	0	55	0	1	0	1	1	0	3	0	37	0	1	2	1	15	36
OTU9238	9	11	0	3	22	9	4	10	2	5	6	0	9	0	3	0	28	12	1	26	0	0	0	49	0	0	0	1	4	1	0	1	69	0	66	0	0	43	0	0	0	0	0	0	0	0	0	44	0
OTU925	37	0	8	16	17	4	0	0	0	0	5	1	0	0	0	1	0	0	0	0	0	0	0	0	0	0	0	0	0	0	0	1	47	0	47	25	0	0	0	0	0	0	0	0	0	0	0	0	0
OTU926	0	21	0	0	0	0	11	0	8	9	0	0	0	0	22	0	0	0	0	27	0	0	15	0	0	0	0	0	0	0	0	0	43	0	0	0	0	0	46	0	0	0	0	1	10	0	0	1	0
OTU927	0	0	19	1	5	3	12	11	0	0	1	0	0	0	0	0	0	0	0	0	63	0	0	0	0	0	0	0	8	0	0	0	0	0	0	1	0	0	15	0	0	0	0	0	0	34	0	0	0
OTU928	13	3	0	0	1	0	3	20	0	0	0	0	0	0	0	1	27	0	1	3	0	0	0	0	0	0	0	1	10	0	0	76	0	58	0	0	1	0	1	0	0	53	0	0	14	0	51	49	0
OTU929	24	2	0	0	0	5	0	0	0	2	0	0	0	0	10	0	0	0	0	0	32	0	0	0	0	9	0	0	0	0	47	0	0	34	0	0	0	30	0	0	0	27	0	0	0	0	0	0	0
OTU93	65	110	91	112	145	121	109	122	97	36	43	34	63	163	176	216	192	233	185	222	373	288	242	364	254	99	297	373	245	434	218	287	274	315	155	181	179	388	524	358	148	104	349	196	344	355	229	188	293
OTU931	0	0	0	0	3	16	5	0	0	0	0	0	0	19	0	39	0	23	0	0	0	10	0	0	0	0	0	0	0	0	0	39	20	28	0	0	65	0	6	0	0	0	0	0	0	19	0	33	0
OTU932	25	29	23	1	16	8	2	5	3	0	6	0	0	29	0	24	23	0	0	7	0	0	0	77	33	9	0	0	0	40	0	9	0	1	45	6	63	76	2	34	0	0	0	117	0	20	21	47	5
OTU933	0	0	0	0	0	0	0	7	4	0	0	6	0	0	0	0	0	0	0	0	0	0	0	0	0	20	0	28	4	0	0	0	0	0	34	0	0	0	15	1	0	0	0	0	0	0	2	0	31
OTU934	10	2	8	8	7	2	0	7	13	5	0	0	0	51	1	3	80	0	1	3	5	28	67	72	2	12	2	106	14	2	55	26	5	0	40	0	48	0	0	37	1	0	1	52	23	35	2	72	7
OTU935	0	0	0	1	1	0	0	0	0	0	0	0	0	1	0	0	2	60	0	0	0	0	0	0	0	10	1	0	29	0	23	0	31	49	0	0	0	29	46	0	8	0	0	0	0	30	13	34	1
OTU936	0	0	0	0	0	0	0	0	0	0	0	0	0	0	0	1	0	0	0	0	0	16	0	24	22	0	60	0	0	0	32	0	0	0	0	0	0	0	0	0	77	42	29	0	0	0	0	0	26
OTU937	0	10	0	1	0	0	0	0	0	0	0	0	0	0	0	0	31	0	0	0	0	1	0	0	0	0	47	0	23	0	0	84	0	0	0	2	0	0	0	0	0	40	7	0	0	0	102	0	0
OTU938	0	0	0	0	0	0	1	0	0	0	0	0	8	0	2	21	16	0	0	26	0	35	0	1	1	14	1	58	13	0	0	0	0	21	0	73	0	0	0	0	31	0	0	19	0	0	1	0	27
OTU94	223	202	224	229	225	137	191	207	265	6	1	8	2	3	27	0	2	2	0	0	40	20	23	2	78	8	1	45	33	99	1	86	1	0	56	1	27	75	0	1	1	73	9	1	22	25	23	0	126
OTU942	0	13	20	16	5	3	0	0	12	1	0	0	0	0	21	0	0	0	0	0	0	0	17	0	22	13	44	0	0	0	0	0	0	0	0	0	0	0	0	0	0	0	0	1	0	0	28	0	0
OTU944	0	0	0	0	0	0	0	0	0	12	0	0	0	0	0	0	0	0	1	42	38	0	0	0	1	44	0	0	8	0	0	0	0	0	32	0	0	0	0	0	0	0	1	0	0	0	0	16	0
OTU945	44	3	5	0	5	12	7	0	1	0	0	15	0	0	1	31	62	2	0	1	17	0	14	53	1	0	2	0	4	0	73	15	1	0	0	16	27	0	0	1	0	17	64	0	0	0	0	52	1
OTU946	53	33	2	50	34	22	36	83	9	0	0	0	0	0	0	0	0	0	0	0	0	0	0	0	0	0	0	0	0	0	0	0	0	0	0	22	0	0	0	0	0	0	0	0	0	0	0	0	0
OTU947	0	28	10	0	2	0	0	0	0	0	3	0	0	0	0	0	36	1	0	0	0	0	0	0	0	0	1	3	0	0	0	0	0	0	0	0	56	0	1	43	0	0	0	0	17	0	0	0	0
OTU948	0	44	5	25	0	6	23	2	0	1	0	0	0	0	0	0	0	41	22	0	0	0	1	0	52	0	0	0	9	0	0	1	3	0	35	0	0	0	0	0	0	0	1	0	0	0	0	0	52
OTU949	0	0	4	0	0	0	0	0	0	0	0	0	0	0	0	0	2	0	0	0	0	6	0	0	0	0	2	0	8	0	0	0	0	53	0	0	0	0	0	32	0	1	0	0	0	0	47	0	0
OTU95	25	126	83	54	86	107	50	78	74	39	3	29	7	81	109	52	36	106	85	10	4	114	41	174	46	17	51	161	95	333	127	36	76	82	46	129	118	141	91	51	30	77	89	6	138	0	28	155	39
OTU951	0	0	4	1	4	1	8	27	17	4	0	2	29	87	0	0	3	0	38	28	1	1	0	0	1	0	0	1	14	48	44	0	65	42	0	94	0	0	0	0	1	0	0	0	1	0	55	0	0
OTU952	0	0	0	0	17	25	0	23	14	0	0	0	0	1	0	0	0	0	0	55	0	0	0	0	0	0	0	0	11	0	0	0	0	0	42	0	12	0	0	0	0	0	0	0	0	0	0	0	0
OTU9526	48	14	70	31	89	129	21	43	50	58	30	24	77	49	39	181	93	146	277	98	169	64	216	61	99	103	26	217	100	117	129	93	119	314	85	155	48	73	15	119	122	62	254	145	58	368	104	118	133
OTU9527	7	5	20	0	5	0	10	14	0	0	1	9	0	0	79	36	3	1	54	3	20	1	14	1	0	0	36	1	1	1	1	0	72	67	2	75	2	0	0	0	0	0	0	1	2	70	0	0	0
OTU953	17	0	12	7	0	1	5	14	6	0	0	8	0	0	12	6	0	0	62	52	0	0	0	0	10	0	0	0	7	0	0	35	0	0	35	0	12	47	6	0	0	0	0	0	5	0	0	0	1
OTU9544	1	0	3	0	1	8	20	6	2	0	0	7	0	0	0	1	2	0	0	2	1	0	37	0	0	1	37	2	0	0	0	6	0	0	0	4	0	0	0	0	0	18	0	0	0	0	0	0	0
OTU955	9	34	1	10	3	0	0	21	0	1	0	0	2	2	0	1	11	0	0	4	1	0	1	2	1	1	0	0	8	0	0	2	1	43	0	0	124	0	0	0	37	0	0	1	0	0	0	78	0
OTU956	0	51	16	0	6	16	32	0	54	0	0	0	0	0	0	0	0	0	0	0	0	0	0	0	0	0	0	0	1	52	0	0	0	0	0	0	0	0	0	0	1	0	2	0	1	0	0	0	0
OTU957	0	0	0	0	0	4	0	0	2	0	0	3	0	1	35	27	0	0	0	0	0	0	0	0	0	0	0	0	0	0	0	0	67	0	1	0	0	21	39	0	89	25	1	1	0	0	14	0	0
OTU958	0	0	0	0	0	0	0	0	0	0	0	0	0	0	0	0	0	0	0	61	1	0	0	0	0	0	0	0	39	1	0	0	0	0	0	0	0	0	0	0	0	0	0	0	0	0	0	23	0
OTU959	0	0	0	0	0	0	0	0	6	0	6	0	0	0	0	15	0	0	38	0	0	0	0	0	0	0	45	0	0	0	0	0	0	2	0	0	8	0	0	0	0	0	0	0	0	0	0	0	0
OTU9595	15	16	11	9	1	15	0	12	22	3	0	0	1	22	2	72	59	0	0	30	128	55	3	40	5	14	34	3	47	62	113	0	39	4	87	81	18	0	0	32	2	1	29	30	20	0	0	47	41
OTU9598	0	17	0	0	0	0	6	0	0	0	0	0	0	1	0	0	0	0	0	1	28	0	1	0	5	9	2	1	15	1	0	1	0	1	0	0	0	0	1	0	38	3	0	0	0	0	0	6	2
OTU96	13	11	91	25	58	34	46	38	45	0	16	3	1	2	1	0	16	1	0	40	1	3	0	58	0	0	34	0	0	49	1	1	1	0	0	2	0	0	0	0	0	0	0	91	0	42	65	74	1
OTU960	0	2	0	3	18	8	0	0	0	0	0	0	0	1	0	25	0	0	0	11	0	0	37	0	0	0	0	0	18	10	23	0	0	0	0	24	0	0	0	2	0	0	0	0	0	0	0	0	0
OTU9616	136	189	127	81	71	122	109	168	205	22	7	5	27	65	181	85	84	133	41	108	80	9	13	21	4	31	42	90	85	1	12	31	1	40	59	37	2	102	102	3	82	121	78	75	47	140	145	168	185
OTU964	0	0	0	0	0	12	3	0	2	0	0	0	0	0	0	0	0	0	0	0	0	0	0	0	0	0	0	1	0	0	0	0	0	0	0	0	371	3	0	58	0	9	13	0	0	0	0	0	0
OTU9650	39	2	1	2	0	5	2	5	0	5	0	6	0	20	0	0	2	0	1	36	63	0	38	4	0	0	38	0	1	22	1	80	0	2	32	3	0	20	0	0	47	1	0	2	0	0	19	39	0
OTU966	3	0	7	13	1	0	0	0	0	0	11	0	0	1	0	0	0	1	0	0	0	0	0	19	0	0	0	0	0	54	0	0	0	0	0	0	0	0	1	0	1	12	0	1	33	0	0	0	0
OTU9674	0	0	0	0	0	0	0	0	0	0	0	2	6	0	0	16	0	0	31	0	0	1	0	6	0	2	1	0	0	24	1	37	0	0	0	0	0	1	0	0	2	0	28	14	0	20	0	44	0
OTU9678	10	29	7	1	0	15	0	16	19	0	0	2	0	22	4	0	0	0	1	4	0	3	17	21	0	0	32	0	0	22	0	7	37	31	0	1	0	1	50	4	1	1	32	1	28	0	0	0	0
OTU968	0	0	14	16	11	11	13	0	8	1	12	0	0	0	0	0	1	1	0	0	0	0	0	0	1	11	0	0	0	2	0	39	0	0	0	0	0	1	0	0	0	1	1	0	1	1	0	2	2
OTU969	39	0	0	5	15	0	0	23	31	0	1	1	0	0	0	0	0	1	0	1	1	0	0	0	0	0	0	0	0	1	0	0	0	1	28	1	0	0	44	0	0	0	0	0	0	32	0	0	0
OTU97	145	131	57	129	116	141	115	160	187	1	0	1	1	2	10	17	1	5	0	1	0	2	0	0	0	0	30	0	0	26	1	2	20	0	3	63	50	15	0	1	0	0	0	1	0	0	0	0	0
OTU970	9	0	1	0	0	0	1	0	0	0	0	0	0	7	16	0	5	0	0	0	0	0	0	0	0	1	1	1	0	1	2	0	0	1	0	0	0	0	11	3	0	0	19	0	1	22	0	0	0
OTU971	0	0	0	22	21	0	0	0	12	1	1	5	8	2	1	90	1	0	111	0	11	1	42	35	2	1	19	57	0	31	36	1	0	0	1	2	1	63	1	97	0	17	36	2	16	10	0	0	0
OTU972	0	0	0	0	0	0	0	0	0	0	0	0	0	0	0	0	0	0	1	2	0	1	29	0	0	0	0	0	0	45	0	0	41	0	0	0	0	0	0	0	0	0	62	0	154	0	39	0	1
OTU9721	0	0	0	2	6	1	0	0	0	0	0	0	0	2	3	0	1	2	1	1	0	17	3	1	29	3	4	1	6	1	2	3	1	0	4	5	0	2	1	0	2	37	0	2	2	0	26	38	0
OTU975	0	0	26	0	1	0	0	0	1	0	1	0	0	2	0	0	34	0	0	0	1	0	0	1	57	0	0	0	39	0	0	0	0	0	0	0	0	1	0	0	0	0	0	0	34	0	0	0	0
OTU976	19	12	8	11	27	16	9	32	7	1	0	0	10	30	61	47	21	1	0	1	1	0	0	2	1	0	1	1	0	1	32	0	3	0	72	1	0	1	0	0	1	23	0	2	21	11	21	46	35
OTU977	0	4	1	0	0	0	0	0	0	0	0	0	0	0	5	0	0	0	21	0	0	0	0	0	24	0	0	0	0	0	0	0	0	27	0	54	47	0	0	2	0	0	0	0	0	48	19	0	0
OTU978	6	0	1	0	0	7	1	7	9	8	0	15	0	0	0	0	0	0	0	0	0	0	0	0	0	0	0	7	4	0	0	0	1	0	0	63	0	61	53	0	0	1	1	0	15	3	0	74	0
OTU979	0	10	8	36	33	17	22	60	1	0	0	7	1	1	5	0	95	5	38	2	51	0	1	80	54	7	50	6	34	41	66	57	1	0	3	78	1	0	25	131	0	1	0	37	0	0	0	0	37
OTU9793	0	0	6	0	11	5	0	23	1	0	0	5	0	0	0	46	0	0	0	0	0	0	0	26	0	0	2	0	0	13	0	1	33	0	0	47	37	0	24	0	0	0	0	0	17	2	0	2	22
OTU98	70	26	62	75	140	76	42	70	41	34	29	14	14	12	27	42	132	42	47	46	8	36	95	47	51	92	39	128	41	40	75	102	0	94	113	87	22	73	132	129	33	15	29	112	69	25	76	145	53
OTU981	0	0	0	0	0	9	0	1	0	0	0	0	0	0	0	0	0	62	0	0	0	33	0	0	0	0	0	17	0	0	1	0	0	0	0	0	0	0	0	0	0	0	0	0	0	18	0	0	0
OTU982	10	0	21	0	12	2	0	9	11	0	11	0	21	0	0	1	0	29	25	0	0	0	59	6	0	22	66	0	5	0	0	33	0	39	2	32	0	0	1	0	0	0	43	0	11	73	0	0	0
OTU983	23	0	6	0	13	0	0	17	0	0	0	0	0	1	0	0	0	0	2	0	0	0	0	1	0	0	0	0	4	1	0	0	0	0	0	1	0	0	0	0	0	0	0	0	0	0	0	0	8
OTU986	0	10	0	2	1	3	6	14	7	0	3	1	0	45	47	0	24	4	1	60	12	1	16	34	24	24	35	1	33	58	28	8	3	0	0	80	0	0	0	0	1	16	1	43	26	20	0	1	1
OTU989	12	0	0	0	0	0	0	0	0	0	0	9	0	31	0	0	0	0	22	0	0	0	0	0	0	0	0	38	32	0	86	0	0	0	42	0	0	0	0	0	2	0	0	0	0	0	1	38	0
OTU99	34	23	6	21	25	43	19	30	6	14	8	16	0	28	87	169	14	0	14	29	100	46	65	33	3	44	72	17	22	78	92	104	58	101	1	79	28	27	0	55	84	46	26	0	31	134	72	57	102
OTU990	0	0	0	0	0	0	0	0	0	10	0	12	0	0	0	6	0	0	0	0	0	17	0	0	0	0	0	0	0	26	53	0	0	0	0	0	0	0	0	51	0	0	0	0	0	2	0	0	0
OTU991	12	10	3	2	13	0	8	2	0	0	0	0	0	13	74	1	26	2	86	0	19	1	1	17	1	9	51	4	14	0	1	1	1	0	0	3	0	3	21	16	0	1	0	26	0	0	0	0	21
OTU992	17	9	15	0	28	9	0	0	0	0	0	0	0	0	0	0	0	1	0	0	0	0	0	0	0	15	26	0	16	1	0	24	0	0	0	27	0	0	0	0	0	0	61	21	0	0	25	0	0
OTU993	0	0	0	2	5	3	0	1	0	0	0	30	20	1	0	0	0	0	67	0	0	0	0	0	0	8	20	0	0	37	35	0	0	0	0	0	0	42	0	0	0	0	27	0	42	5	0	0	0
OTU994	0	7	0	0	0	10	5	16	0	6	0	0	0	0	40	0	0	0	30	0	55	0	0	0	0	33	0	83	25	0	0	0	1	0	48	0	0	0	0	21	0	22	0	13	31	0	0	0	0
OTU996	50	21	54	21	19	21	18	22	30	23	0	35	16	29	54	12	90	11	1	35	61	32	51	54	54	4	60	0	59	263	163	2	71	0	50	32	60	117	91	37	6	2	1	3	97	100	0	35	156
OTU9975	0	0	0	0	0	3	15	5	0	0	0	7	6	35	0	0	0	0	0	1	0	0	0	0	0	1	0	0	0	26	0	0	0	0	4	0	0	3	17	0	0	26	0	41	0	1	28	0	0
OTU999	0	0	2	0	0	3	0	31	10	0	1	0	0	0	11	58	1	0	12	1	55	30	1	1	0	1	31	0	1	0	0	1	87	0	6	2	0	2	0	56	1	1	0	0	1	42	3	0	3
[truncated: 37 more columns]
